# Supplementary material for: Engaging vinylene carbonate in ruthenium-catalyzed regioselective C-4 methylenation and C-8 formylmethylation of isoquinolinones
Source: Royal Society of Chemistry journal article supplement (doi:10.1039/d4cc03466j), 2024-01-01
Supplement: d4cc03466j1.pdf [file d4cc03466j1.pdf]

# Supporting Information

## Engaging Vinylene Carbonate in Ruthenium-Catalyzed Regioselective C-4 Methylenation and C-8 Formylmethylation of Isoquinolinones.

Dolly David Thalakkottukara<sup>a</sup> and Thirumanavelan Gandhi\*<sup>a</sup>

<sup>a</sup>Department of Chemistry, School of Advanced Sciences, Vellore Institute of Technology, Vellore, Tamil Nadu-632014, India. E-mail: [velan.g@vit.ac.in](mailto:velan.g@vit.ac.in)

# Table of Contents

|    |                                                                      |     |
|----|----------------------------------------------------------------------|-----|
| 1  | General experimental methods and materials and X-Ray Crystallography | S3  |
| 2  | Experimental procedure                                               | S4  |
|    | 2.1. Synthesis of starting material                                  | S4  |
|    | 2.2. Experimental procedure for methylenation                        | S5  |
|    | 2.3. Experimental procedure for formylmethylation.                   | S5  |
| 3  | Optimization table                                                   | S6  |
| 4  | Reluctant substrates                                                 | S7  |
| 5  | Crystallographic data.                                               | S8  |
|    | 5.1. Crystallographic data of <b>3c</b>                              | S8  |
|    | 5.2. Crystallographic data of <b>3m</b>                              | S11 |
| 6  | Mechanistic studies                                                  | S15 |
| 7  | Detection of CO <sub>2</sub>                                         | S20 |
| 8  | Mass spectrometry studies for determining intermediates              | S22 |
| 9  | Characterisation data                                                | S25 |
|    | 9.1. NMR data                                                        | S34 |
| 10 | References                                                           | S58 |

## 1. General experimental methods and materials.

Unless otherwise mentioned all the reactions were carried out in Schlenk tube (15 mL). Chemicals were purchased from Sigma-Aldrich, Alfa Aesar, TCI, AVRA and Carbanio and used without further purification. Vinylene carbonate was purchased from TCI chemicals and used as such for the transformations. Anhydrous DCE, MeOH, TFE and HFIP were purchased from commercial sources and used without further purification. Thin layer chromatography was carried out on 250 mm diameter aluminium supported silica gel TLC plates (MERCK TLC Plates) and with narrow tip capillary. The products were purified by column chromatography using 100-200 mesh silica gel.  $^1\text{H}$  NMR spectra were recorded on Bruker spectrometer (400 MHz) and reported in units *ppm* (parts per million) relative to the signals for residual chloroform (7.26 *ppm*) in the deuterated solvent.  $^{13}\text{C}\{^1\text{H}\}$  NMR spectra were recorded on Bruker spectrometer (100 MHz) and are reported in *ppm* relative to deuterated chloroform (77.23 *ppm*) with tetramethyl silane as an internal standard.  $^{19}\text{F}$  NMR spectra were recorded on Bruker spectrometer (376 MHz) and are reported in *ppm*. Peaks at  $\delta = 1.56\text{--}1.61$  ppm in  $^1\text{H}$  NMR spectra of compounds recorded in  $\text{CDCl}_3$  correspond to water present, if any. Additional peaks at  $\delta = 0.86\text{--}0.88$  ppm and  $\delta = 1.25\text{--}1.28$  ppm in  $^1\text{H}$  NMR spectra and  $\delta = 29.7\text{--}29.8$  ppm in  $^{13}\text{C}\{^1\text{H}\}$ -NMR spectra of compounds recorded in  $\text{CDCl}_3$  correspond to grease present, if any. Coupling constants (*J*) are reported in Hz; splitting patterns are assigned *s* = singlet, *d* = doublet, *t* = triplet, *q* = quartet, *dd* = doublet of doublet, *td* = triplet of doublet, *br* = broad signal. High-resolution mass spectra (HRMS) were performed on TOF-Q analyser.

### 1. 1 X-ray crystallography of compounds **3c** and **3n**.

Single crystal X-ray structural data of the compounds **3c** and **3n** were collected on a CMOS based Bruker D8 Venture PHOTON 100 diffractometer equipped with a INCOATEC microfocus source with graphite monochromated Mo  $\text{K}\alpha$  radiation ( $\lambda = 0.71073$  Å) operating at 50 kV and 30mA. The SAINT<sup>1</sup> program was used for the integration of diffraction profiles and absorption correction was applied with the SADABS<sup>2</sup> program. Both the structures were initially solved by SIR 92<sup>3</sup> and refined by the full matrix least squares method using SHELXL-2013<sup>4</sup> WinGX system, Ver2013.3.<sup>5</sup> The non-hydrogen atoms in all the structures were located using the difference Fourier map and refined anisotropically. The hydrogen atoms were fixed by HFIX and placed in ideal positions and

included in the refinement process using a riding model with isotropic thermal parameters. All the crystallographic and structure refinement data of the compounds are summarized in section 5.

## 2. Experimental procedure

### 2. 1. Synthesis of *N*-substituted Isoquinolones.

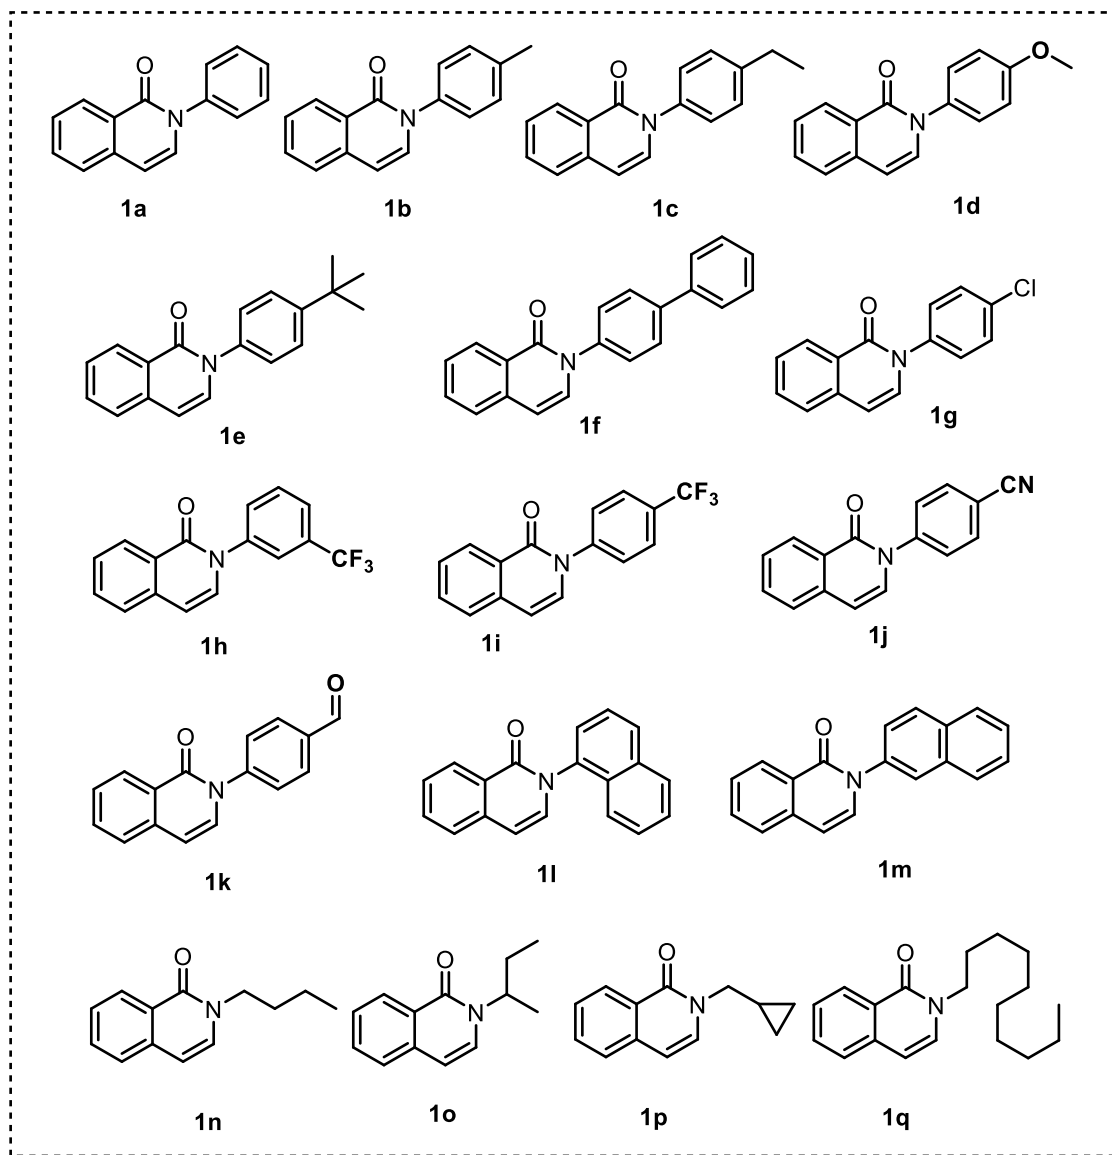

**Table 1.** *N*-substituted Isoquinolones

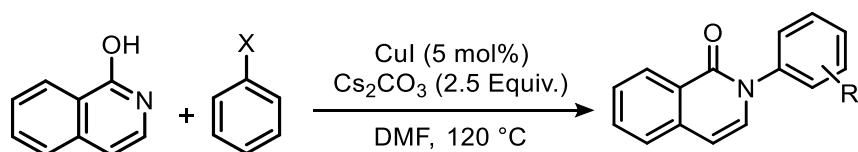

**Scheme S1.** Synthesis of *N*-substituted Isoquinolones

*N*-substituted isoquinolinones were synthesized using reported procedure.<sup>6</sup> Derivatives of isoquinolinones were synthesised by charging 1-Hydroxy isoquinoline (1 equiv) in an oven dried tube followed by aryl or alkyl halides (1.2 equiv). To this copper iodide (5 mol%) and cesium carbonate (2.5 Equiv.) added along with 1 mL of DMF as solvent. The reaction is allowed to stir for 24 h at 120 °C. After completion of the reaction, the mixture was cooled to room temperature and diluted with DCM. This was extracted with water and dried over Na<sub>2</sub>SO<sub>4</sub>, filtered, and concentrated under reduced pressure. The residue was purified by column chromatography on 100-200 mesh silica gel using hexane and ethyl acetate to afford the desired products of *N*-substituted isoquinolinone derivatives (Scheme S1).

## 2. 2. Regioselective C4-methylenation of isoquinolinones

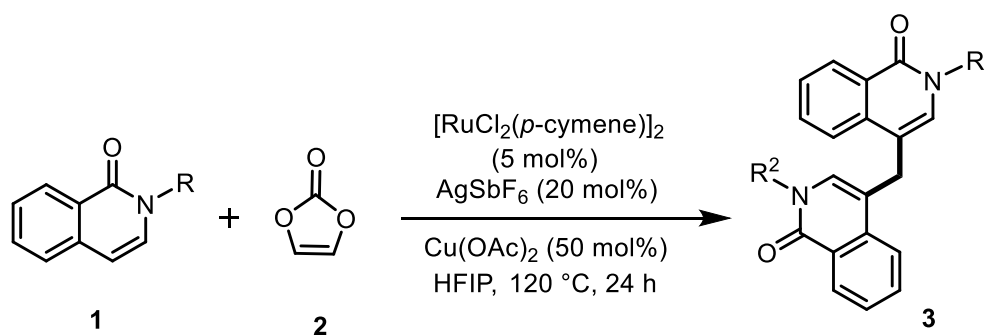

**Scheme S2.** Regioselective C4-methylenation of isoquinolinones

To an oven-dried Schlenk tube (15 mL) equipped with a stir bar was charged with 1mL of HFIP and isoquinolinone **1a** (2 equiv) and vinylene carbonate **2** (0.58 mmol, 1 equiv). To this reaction mixture, [Ru(*p*-cymene)Cl<sub>2</sub>]<sub>2</sub> (5 mol%), AgSbF<sub>6</sub> (20 mol%) and Cu(OAc)<sub>2</sub> (50 mol%). The tube was flushed with nitrogen and screw capped under nitrogen flow and placed in a preheated oil bath at 120 °C for 24 h. After the indicated time, the reaction mixture was cooled and concentrated. The crude material was purified by column chromatography on silica gel (100-200 mesh) using *n*-hexane – ethyl acetate as eluent, to yield the title compound (Scheme S2).

## 2.3. Regioselective C8-formylmethylation of isoquinolinones.

To an oven-dried Schlenk tube (15 mL) equipped with a stir bar was charged with 1mL of HFIP isoquinolinone **1a** (0.22 mmol, 1 equiv) and vinylene carbonate **2** (2 equiv) added. To this reaction mixture, [Ru(*p*-cymene)Cl<sub>2</sub>]<sub>2</sub> (5 mol%), AgSbF<sub>6</sub> (20 mol%), 1-Ad-COOH (20 mol%) and PivOH (0.44 mmol, 2 equiv). The tube was flushed with nitrogen and screw capped under nitrogen flow and placed in a preheated oil bath at 90 °C for 12 h. After the indicated time, the reaction mixture

was cooled and concentrated. The crude material was purified by column chromatography on silica gel (100-200 mesh) using *n*-hexane – ethyl acetate as eluent, to yield the title compound (Scheme S3).

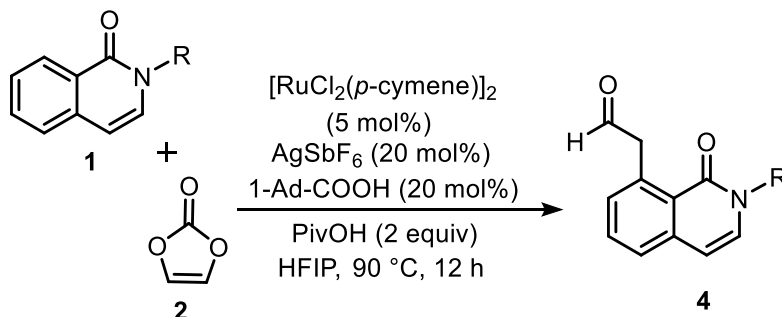

**Scheme S3.** Regioselective C8-formylmethylation of isoquinolinones

### 3. Optimization table

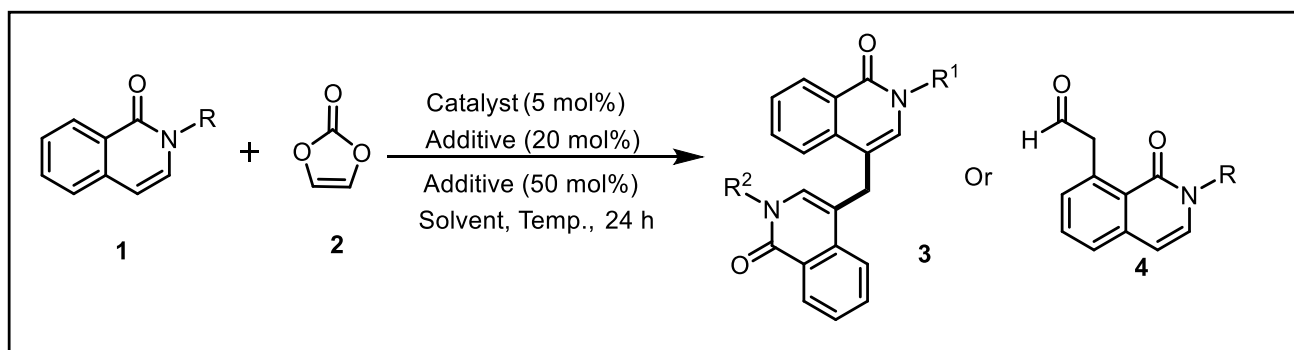

| Sl. No. | Catalyst                                    | Additive                                   | Solvent     | Additive         | Temperature | Yield of 3 (%) | Yield of 4 (%) |
|---------|---------------------------------------------|--------------------------------------------|-------------|------------------|-------------|----------------|----------------|
| 1       | $[\text{Ru}(p\text{-cymene})\text{Cl}_2]_2$ | PivOH/1-Ad-COOH                            | HFIP        | $\text{AgSbF}_6$ | 120 °C      | ND             | 34             |
| 2       | $[\text{Ru}(p\text{-cymene})\text{Cl}_2]_2$ | PivOH/1-Ad-COOH                            | HFIP        | $\text{AgOTf}$   | 120 °C      | ND             | ND             |
| 3       | $[\text{Ru}(p\text{-cymene})\text{Cl}_2]_2$ | PivOH/1-Ad-COOH                            | HFIP        | $\text{AgOAc}$   | 120 °C      | ND             | ND             |
| 4       | $[\text{Ru}(p\text{-cymene})\text{Cl}_2]_2$ | PivOH/1-Ad-COOH                            | DCE         | $\text{AgSbF}_6$ | 90 °C       | ND             | ND             |
| 5       | $[\text{Ru}(p\text{-cymene})\text{Cl}_2]_2$ | PivOH/1-Ad-COOH                            | Isopropanol | $\text{AgSbF}_6$ | 90 °C       | ND             | ND             |
| 6       | $[\text{Ru}(p\text{-cymene})\text{Cl}_2]_2$ | PivOH/1-Ad-COOH                            | HFIP        | $\text{AgSbF}_6$ | 90 °C       | ND             | 43             |
| 7       | $[\text{Ru}(p\text{-cymene})\text{Cl}_2]_2$ | PivOH/1-Ad-COOH                            | HFIP        | $\text{AgSbF}_6$ | 90 °C       | ND             | 61             |
| 8       | $[\text{Ru}(p\text{-cymene})\text{Cl}_2]_2$ | $\text{Cu}(\text{OAc})_2/1\text{-Ad-COOH}$ | HFIP        | $\text{AgSbF}_6$ | 120 °C      | 81             | ND             |

|    |                                                      |                                   |             |                    |        |    |    |
|----|------------------------------------------------------|-----------------------------------|-------------|--------------------|--------|----|----|
| 9  | [Ru( <i>p</i> -cymene)Cl <sub>2</sub> ] <sub>2</sub> | Cu(OAc) <sub>2</sub> (2 Equiv.)   | HFIP        | AgSbF <sub>6</sub> | 120 °C | 81 | ND |
| 10 | [Ru( <i>p</i> -cymene)Cl <sub>2</sub> ] <sub>2</sub> | CuI                               | HFIP        | AgSbF <sub>6</sub> | 120 °C | ND | ND |
| 11 | [Ru( <i>p</i> -cymene)Cl <sub>2</sub> ] <sub>2</sub> | NaOAc                             | HFIP        | AgSbF <sub>6</sub> | 120 °C | ND | ND |
| 12 | [Ru( <i>p</i> -cymene)Cl <sub>2</sub> ] <sub>2</sub> | K <sub>2</sub> CO <sub>3</sub>    | HFIP        | AgSbF <sub>6</sub> | 120 °C | ND | ND |
| 13 | [Ru( <i>p</i> -cymene)Cl <sub>2</sub> ] <sub>2</sub> | Cu(OAc) <sub>2</sub> (1 Equiv.)   | HFIP        | AgSbF <sub>6</sub> | 120 °C | 79 | ND |
| 14 | [Ru( <i>p</i> -cymene)Cl <sub>2</sub> ] <sub>2</sub> | Cu(OAc) <sub>2</sub> (0.5 Equiv.) | HFIP        | AgSbF <sub>6</sub> | 120 °C | 78 | ND |
| 15 | [Ru( <i>p</i> -cymene)Cl <sub>2</sub> ] <sub>2</sub> | Cu(OAc) <sub>2</sub> (0.5 Equiv.) | DCE         | AgSbF <sub>6</sub> | 120 °C | ND | ND |
| 16 | [Ru( <i>p</i> -cymene)Cl <sub>2</sub> ] <sub>2</sub> | Cu(OAc) <sub>2</sub> (0.5 Equiv.) | Isopropanol | AgSbF <sub>6</sub> | 120 °C | ND | ND |
| 17 | [Ru( <i>p</i> -cymene)Cl <sub>2</sub> ] <sub>2</sub> | Cu(OAc) <sub>2</sub> (0.5 Equiv.) | HFIP        | AgSbF <sub>6</sub> | 140 °C | 56 | ND |
| 18 | [Ru( <i>p</i> -cymene)Cl <sub>2</sub> ] <sub>2</sub> | -                                 | HFIP        |                    | 120 °C | ND | ND |
| 19 | -                                                    | Cu(OAc) <sub>2</sub> (0.2 Equiv.) | HFIP        | AgSbF <sub>6</sub> | 120 °C | ND | ND |
| 20 |                                                      | Cu(OAc) <sub>2</sub> / Bipyridyl  | HFIP        | AgSbF <sub>6</sub> | 120 °C | ND | ND |

#### 4. Reluctant substrates

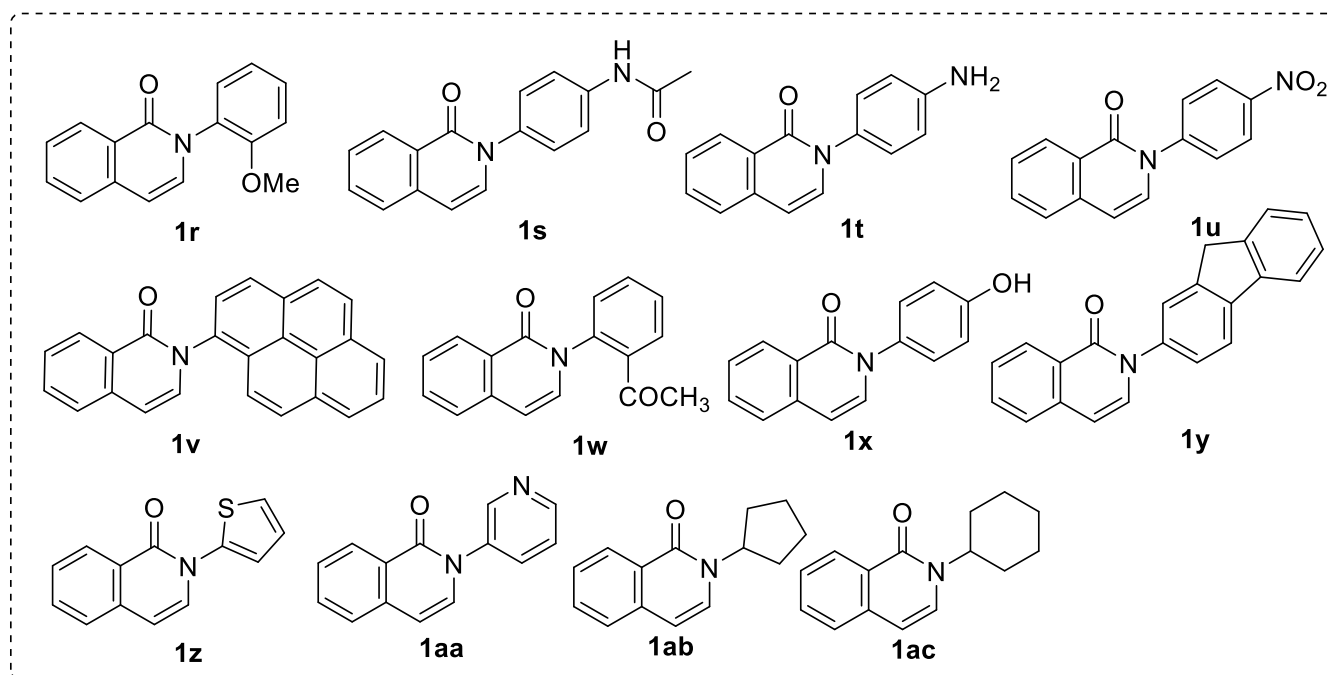

**Table 2.** Reluctant substrates

## 5. Crystallographic data

### 5.1. Crystallographic data for 3c

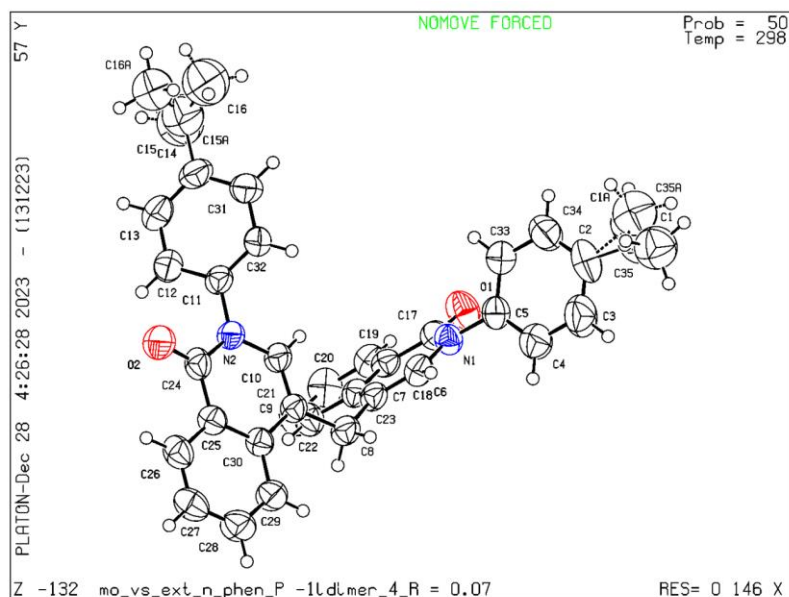

**Fig 1.** Perspective view of the X-ray structure of **3c**. Hydrogen atoms are omitted for clarity.

| Compound                           | <b>3c</b>                    |
|------------------------------------|------------------------------|
| CCDC No.                           | 2351517                      |
| Formula                            | $C_{35}H_{30}N_2O_2$         |
| <i>D</i> calc./ g cm <sup>-3</sup> | 1.237                        |
| $\mu$ /mm <sup>-1</sup>            | 0.077                        |
| Formula Weight                     | 510.61                       |
| Colour                             | metallic light<br>colourless |
| Shape                              | block-shaped                 |
| Size/mm <sup>3</sup>               | 0.14×0.08×0.02               |
| <i>T</i> /K                        | 298                          |
| Crystal System                     | triclinic                    |
| Space Group                        | <i>P</i> -1                  |
| <i>a</i> /Å                        | 10.4851(5)                   |
| <i>b</i> /Å                        | 11.5807(5)                   |
| <i>c</i> /Å                        | 13.2811(7)                   |
| $\alpha$ /°                        | 66.245(2)                    |
| $\beta$ /°                         | 74.285(2)                    |
| $\gamma$ /°                        | 70.005(2)                    |
| <i>V</i> /Å <sup>3</sup>           | 1370.34(12)                  |
| <i>Z</i>                           | 2                            |
| <i>Z'</i>                          | 1                            |
| Wavelength/Å                       | 0.71073                      |

|                             |              |
|-----------------------------|--------------|
| Radiation type              | MoK $\alpha$ |
| $\Theta_{min}/^{\circ}$     | 1.992        |
| $\Theta_{max}/^{\circ}$     | 26.730       |
| Measured Refl's.            | 42356        |
| Indep't Refl's              | 5817         |
| Refl's $I \geq 2 \sigma(I)$ | 2495         |
| $R_{int}$                   | 0.1295       |
| Parameters                  | 395          |
| Restraints                  | 78           |
| Largest Peak                | 0.347        |
| Deepest Hole                | -0.285       |
| GooF                        | 1.019        |
| $wR2$ (all data)            | 0.2278       |
| $wR2$                       | 0.1716       |
| $R1$ (all data)             | 0.1771       |
| $R1$                        | 0.0691       |

#### 5.1.1. Bond distances of 3c

| Atom | Atom | Distance Å | Atom | Atom | Distance Å |
|------|------|------------|------|------|------------|
| O1   | C17  | 1.225(3)   | C2   | C3   | 1.376(6)   |
| O2   | C24  | 1.228(4)   | C2   | C34  | 1.369(5)   |
| N1   | C5   | 1.439(4)   | C2   | C1A  | 1.556(11)  |
| N1   | C6   | 1.394(4)   | C3   | C4   | 1.376(6)   |
| N1   | C17  | 1.380(4)   | C4   | C5   | 1.362(5)   |
| N2   | C10  | 1.397(4)   | C5   | C33  | 1.380(5)   |
| N2   | C11  | 1.444(4)   | C6   | C7   | 1.335(4)   |
| N2   | C24  | 1.386(4)   | C7   | C8   | 1.500(4)   |
| C1   | C2   | 1.525(10)  | C7   | C23  | 1.449(4)   |
| C1   | C35  | 1.377(11)  | C8   | C9   | 1.513(4)   |
| C9   | C10  | 1.342(4)   | C13  | C14  | 1.370(5)   |
| C9   | C30  | 1.442(4)   | C14  | C15  | 1.547(18)  |

|     |     |          |     |      |          |
|-----|-----|----------|-----|------|----------|
| C11 | C12 | 1.385(4) | C14 | C31  | 1.375(5) |
| C11 | C32 | 1.365(4) | C14 | C15A | 1.515(6) |
| C12 | C13 | 1.371(4) | C15 | C16  | 1.42(2)  |
| C9  | C10 | 1.342(4) | C17 | C18  | 1.461(4) |
| C9  | C30 | 1.442(4) |     |      |          |
| C11 | C12 | 1.385(4) |     |      |          |

### 5.1.2. Bond angles of 3c

| Atom | Atom | Atom | Angle [°]  |  | Atom | Atom | Atom | Angle [°]  |
|------|------|------|------------|--|------|------|------|------------|
| C14  | N1   | C4   | 119.19(17) |  | C27  | C8   |      | 122.56(18) |
| C14  | N1   | C4   | 118.16(17) |  | C8   | C9   |      | 123.47(19) |
| C9   | N1   | C5   | 122.61(18) |  | N2   | C10  |      | 111.92(18) |
| C21  | N2   | C10  | 118.21(17) |  | C12  | C11  |      | 112.3(2)   |
| C21  | N2   | C9   | 122.63(17) |  | C13  | C12  |      | 112.8(2)   |
| C1   | N2   | C10  | 119.06(17) |  | O2   | C14  |      | 120.9(2)   |
| C2   | C2   | C3   | 117.7(4)   |  | O2   | C14  |      | 123.4(2)   |
| N1   | C3   | C4   | 113.8(3)   |  | N1   | C14  |      | 115.67(18) |
| C6   | C4   | C3   | 112.0(2)   |  | C16  | C15  |      | 120.97(18) |
| C5   | C5   | N1   | 123.34(18) |  | C20  | C15  |      | 119.0(2)   |
| C5   | C6   | C7   | 122.82(17) |  | C20  | C15  |      | 120.0(2)   |
| C16  | C6   | C16  | 118.06(17) |  | C15  | C16  |      | 119.16(19) |
| C8   | C6   | C7   | 119.10(17) |  | C15  | C16  |      | 117.57(18) |
| C9   | C7   | C6   | 117.08(17) |  | C17  | C16  |      | 123.25(19) |

|     |     |     |            |  |     |     |     |            |
|-----|-----|-----|------------|--|-----|-----|-----|------------|
| C9  | C8  | C7  | 119.21(18) |  | C18 | C17 |     | 121.2(2)   |
| C20 | C8  | C27 | 118.17(18) |  | C17 | C18 |     | 120.5(2)   |
| C19 | C19 | C18 | 119.9(2)   |  | C24 | C22 | C21 | 121.08(18) |
| O1  | C20 | C15 | 120.7(2)   |  | C23 | C23 | C22 | 120.3(2)   |
| O1  | C21 | N2  | 121.19(19) |  | C26 | C24 | C25 | 119.6(2)   |
| N1  | C21 | C22 | 123.3(2)   |  | C25 | C25 | C24 | 121.2(2)   |
| C23 | C21 | C22 | 115.53(17) |  | C22 | C26 | C27 | 120.5(2)   |
| C23 | C22 | C21 | 118.49(18) |  | C22 | C27 | C8  | 119.09(17) |
| C27 | C22 | C27 | 120.41(19) |  | C26 | C27 | C26 | 117.96(19) |
|     |     |     |            |  |     | C27 | C8  | 122.95(18) |

## 5.2. Crystallographic data for **3m**

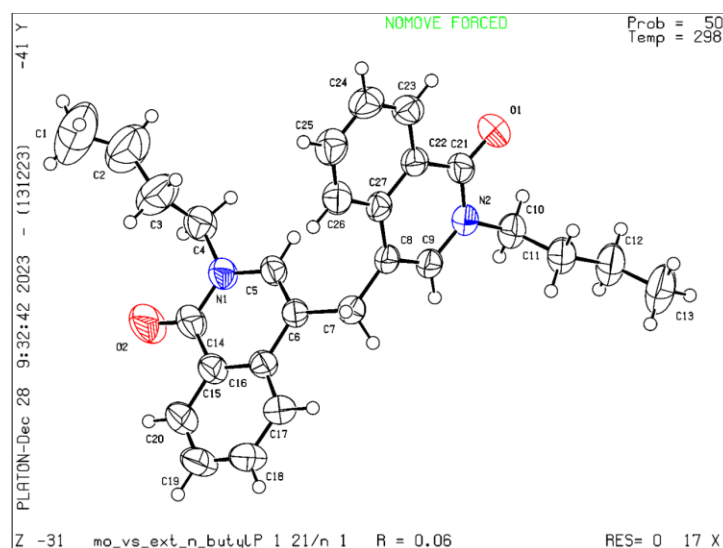

**Fig 2.** Perspective view of the X-ray structure of **3m**. Hydrogen atoms are omitted for clarity.

| Compound                                     | 3m                                                            |
|----------------------------------------------|---------------------------------------------------------------|
| CCDC No.                                     | 2351516                                                       |
| Empirical formula                            | C <sub>27</sub> H <sub>30</sub> N <sub>2</sub> O <sub>2</sub> |
| Formula weight                               | 414.53                                                        |
| Temperature/K                                | 298                                                           |
| Crystal system                               | Monoclinic                                                    |
| Wavelength                                   | 0.71073 Å                                                     |
| Space group                                  | P 2 <sub>1</sub> /n                                           |
| a/Å                                          | 10.0243(4)                                                    |
| b/Å                                          | 12.5308(5)                                                    |
| c/Å                                          | 18.4588(8)                                                    |
| α /°                                         | 90                                                            |
| β /°                                         | 97.5810(10)                                                   |
| γ /°                                         | 90                                                            |
| Volume                                       | 2318.54(16)                                                   |
| Z                                            | 4                                                             |
| Calculated density g/cm <sup>3</sup>         | 1.188                                                         |
| Absorption coefficient (μ/mm <sup>-1</sup> ) | 0.83                                                          |
| F(000)                                       | 888                                                           |
|                                              | -16<h<17                                                      |
| Index ranges                                 | -18<k<18                                                      |
|                                              | -11<l<11                                                      |
| Reflections collected                        | 32117                                                         |
| Independent reflections                      | 5118                                                          |
| Data/restraint/parameters                    | 3969/0/210                                                    |
| Goodness of fit on F <sup>2</sup>            | 1.032                                                         |
| Final R indices[I>2σ(I)]                     | R <sub>1</sub> =0.0590                                        |
|                                              | wR <sub>2</sub> =0.1564                                       |
| Final R indices [all data]                   | R <sub>1</sub> =0.0947                                        |
|                                              | wR <sub>2</sub> =0.1808                                       |

### 5.2.1. Bond distances of 3n

| Atom  | Atom  | Distance Å | Atom  | Atom  | Distance Å |
|-------|-------|------------|-------|-------|------------|
| O(1)  | C(21) | 1.233(2)   | C(11) | C(12) | 1.507(3)   |
| O(2)  | C(14) | 1.226(3)   | C(12) | C(13) | 1.505(4)   |
| N(1)  | C(4)  | 1.470(3)   | C(14) | C(15) | 1.464(3)   |
| N(1)  | C(5)  | 1.382(2)   | C(15) | C(16) | 1.406(3)   |
| N(1)  | C(14) | 1.375(3)   | C(15) | C(20) | 1.401(3)   |
| N(2)  | C(9)  | 1.380(2)   | C(16) | C(17) | 1.407(3)   |
| N(2)  | C(10) | 1.468(3)   | C(17) | C(18) | 1.370(3)   |
| N(2)  | C(21) | 1.373(3)   | C(18) | C(19) | 1.385(4)   |
| C(1)  | C(2)  | 1.375(5)   | C(19) | C(20) | 1.360(4)   |
| C(2)  | C(3)  | 1.476(4)   | C(21) | C(22) | 1.464(3)   |
| C(3)  | C(4)  | 1.507(3)   | C(22) | C(23) | 1.397(3)   |
| C(5)  | C(6)  | 1.342(3)   | C(22) | C(27) | 1.404(3)   |
| C(6)  | C(7)  | 1.513(3)   | C(23) | C(24) | 1.369(3)   |
| C(6)  | C(16) | 1.442(3)   | C(24) | C(25) | 1.386(3)   |
| C(7)  | C(8)  | 1.509(3)   | C(25) | C(26) | 1.367(3)   |
| C(8)  | C(9)  | 1.339(3)   | C(26) | C(27) | 1.405(3)   |
| C(8)  | C(9)  | 1.438(3)   |       |       |            |
| C(10) | C(11) | 1.509(3)   |       |       |            |

### 5.2.2. Bond angles of 3n

| Atom | Atom | Atom | Angle [°]  |  | Atom | Atom | Atom | Angle [°]  |
|------|------|------|------------|--|------|------|------|------------|
| C5   | N1   | C4   | 119.19(17) |  | C24  | C23  | C22  | 120.3(2)   |
| C14  | N1   | C4   | 118.16(17) |  | C23  | C24  | C25  | 119.6(2)   |
| C14  | N1   | C5   | 122.61(18) |  | C26  | C25  | C24  | 121.2(2)   |
| C9   | N2   | C10  | 118.21(17) |  | C25  | C26  | C27  | 120.5(2)   |
| C21  | N2   | C9   | 122.63(17) |  | C22  | C27  | C8   | 119.09(17) |
| C21  | N2   | C10  | 119.06(17) |  | C22  | C27  | C26  | 117.96(19) |
| C1   | C2   | C3   | 117.7(4)   |  | C26  | C27  | C8   | 122.95(18) |
| C2   | C3   | C4   | 113.8(3)   |  | C27  | C8   |      | 122.56(18) |
| N1   | C4   | C3   | 112.0(2)   |  | C8   | C9   |      | 123.47(19) |
| C6   | C5   | N1   | 123.34(18) |  | N2   | C10  |      | 111.92(18) |
| C5   | C6   | C7   | 122.82(17) |  | C12  | C11  |      | 112.3(2)   |
| C5   | C6   | C16  | 118.06(17) |  | C13  | C12  |      | 112.8(2)   |
| C16  | C6   | C7   | 119.10(17) |  | O2   | C14  |      | 120.9(2)   |
| C8   | C7   | C6   | 117.08(17) |  | O2   | C14  |      | 123.4(2)   |
| C9   | C8   | C7   | 119.21(18) |  | N1   | C14  |      | 115.67(18) |
| C9   | C8   | C27  | 118.17(18) |  | C16  | C15  |      | 120.97(18) |
| C20  | C19  | C18  | 119.9(2)   |  | C20  | C15  |      | 119.0(2)   |
| C19  | C20  | C15  | 120.7(2)   |  | C20  | C15  |      | 120.0(2)   |
| O1   | C21  | N2   | 121.19(19) |  | C15  | C16  |      | 119.16(19) |
| O1   | C21  | C22  | 123.3(2)   |  | C15  | C16  |      | 117.57(18) |
| N1   | C21  | C22  | 115.53(17) |  | C17  | C16  |      | 123.25(19) |

|     |     |     |            |  |     |     |  |          |
|-----|-----|-----|------------|--|-----|-----|--|----------|
| C23 | C22 | C21 | 118.49(18) |  | C18 | C17 |  | 121.2(2) |
| C23 | C22 | C27 | 120.41(19) |  | C17 | C18 |  | 120.5(2) |
| C27 | C22 | C21 | 121.08(18) |  |     |     |  |          |

## 6. Mechanistic studies

### 6. 1. H/D exchange experiment without vinylene carbonate:

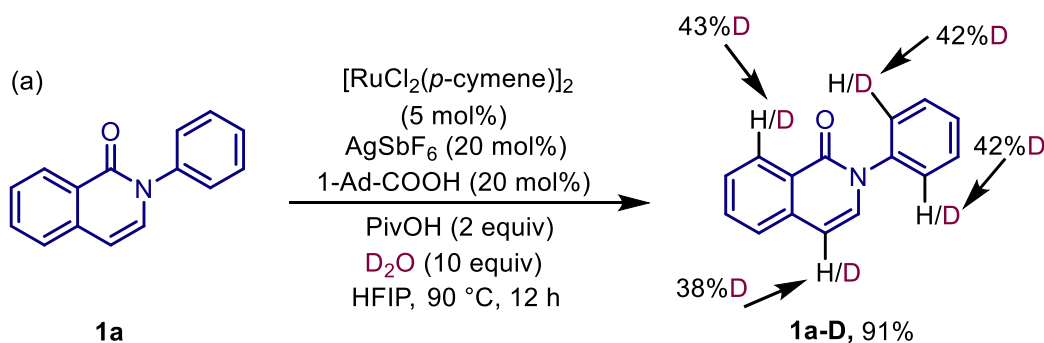

**Scheme S4.** H/D exchange experiment without vinylene carbonate

To an oven-dried Schlenk tube (15 mL) equipped with a stir bar, 1 mL of HFIP and isoquinolinone **1a** (0.22 mmol, 1 equiv) were added. To this reaction mixture,  $[Ru(p\text{-cymene})Cl_2]_2$  (5 mol%),  $AgSbF_6$  (20 mol%), 1-Ad-COOH (20 mol%), PivOH (0.44 mmol, 2 equiv) and  $D_2O$  (10 equiv). The tube was flushed with nitrogen and screw capped under nitrogen flow and placed in a preheated oil bath at 90 °C for 12 h. After the indicated time, the reaction mixture was cooled and concentrated. The crude material was purified by column chromatography on silica gel (100-200 mesh) using *n*-hexane – ethyl acetate as eluent, to yield the title compound (Scheme S4).

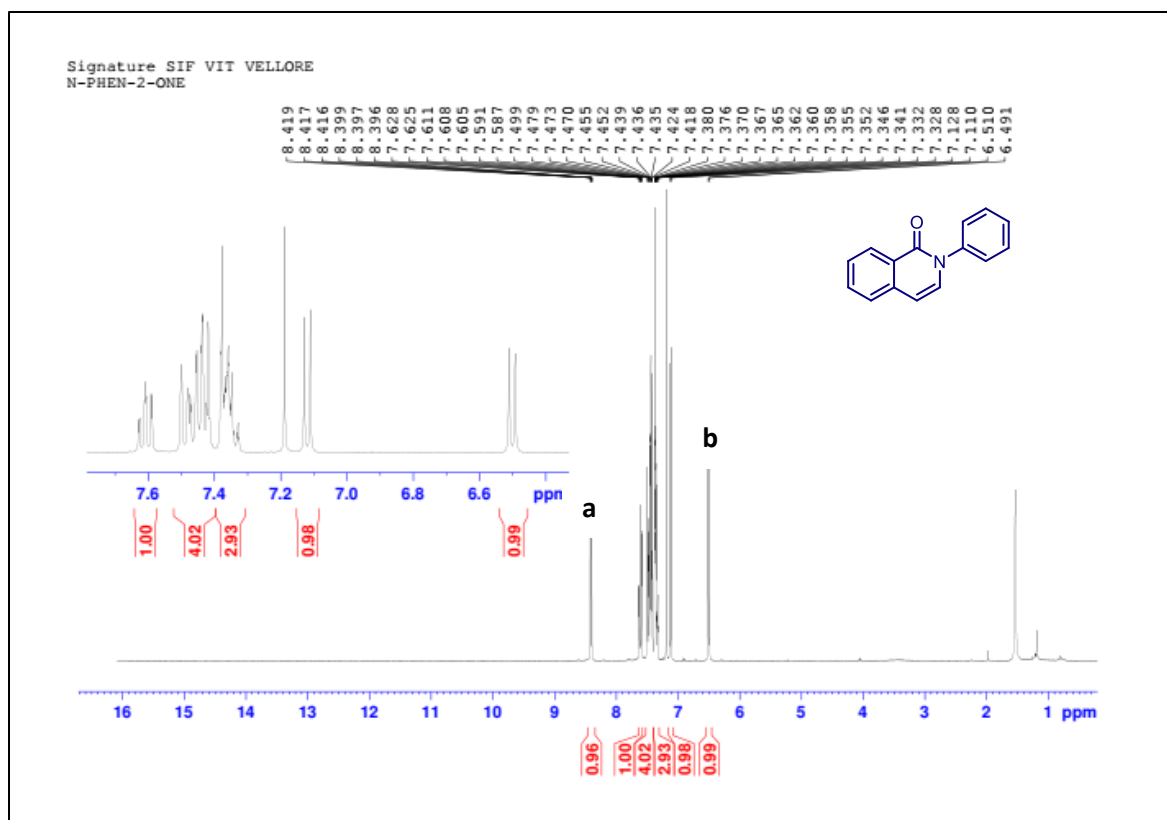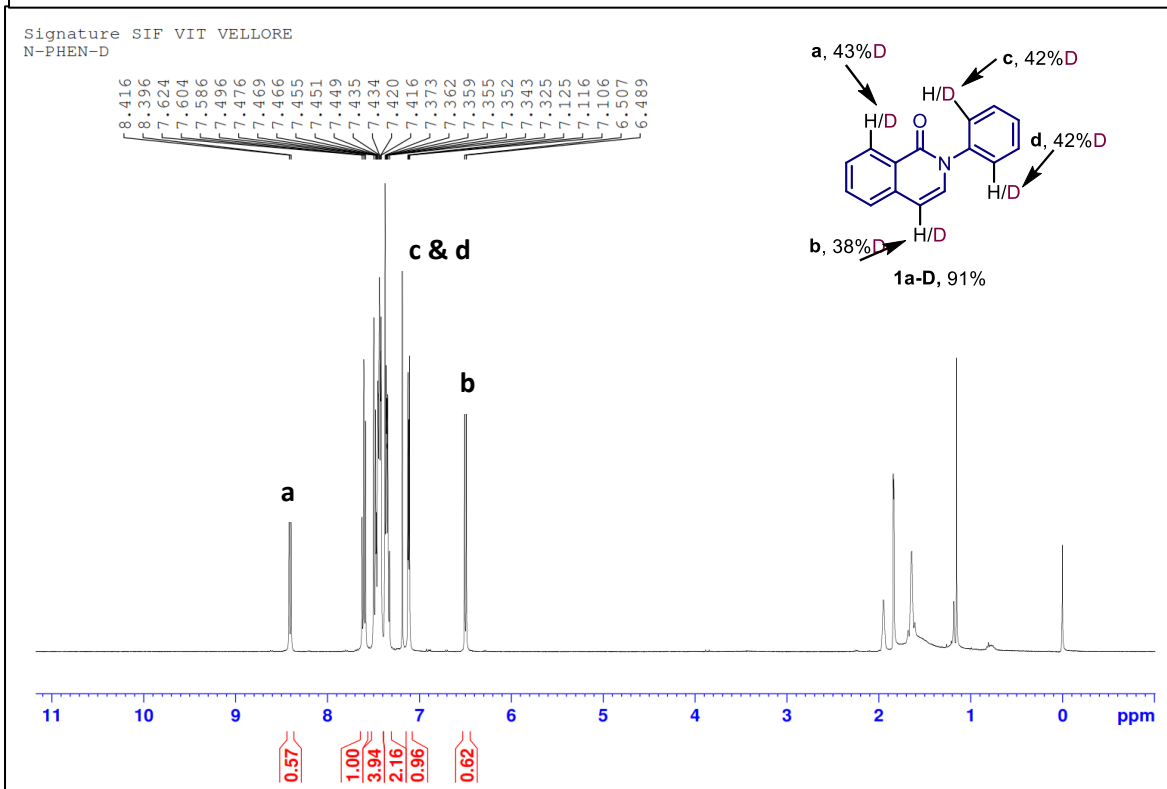

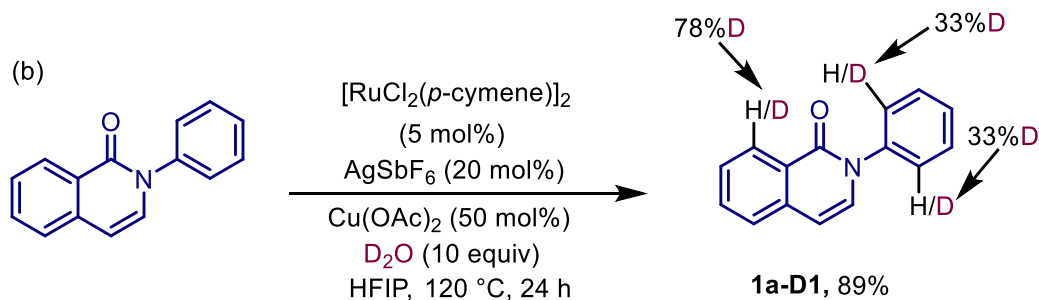

**Scheme S5.** H/D exchange experiment without vinylene carbonate

To an oven-dried Schlenk tube (15 mL) equipped with a stir bar, 1 mL of HFIP and isoquinolinone **1a** (0.22 mmol, 1 equiv) were added. To this reaction mixture,  $[\text{Ru}(p\text{-cymene})\text{Cl}_2]_2$  (5 mol%),  $\text{AgSbF}_6$  (20 mol%),  $\text{Cu}(\text{OAc})_2$  (50 mol%) and  $\text{D}_2\text{O}$  (10 equiv). The tube was flushed with nitrogen and screw capped under nitrogen flow and placed in a preheated oil bath at 120 °C for 24 h. After the indicated time, the reaction mixture was cooled and concentrated. The crude material was purified by column chromatography on silica gel (100-200 mesh) using *n*-hexane – ethyl acetate as eluent, to yield the title compound (Scheme S5).

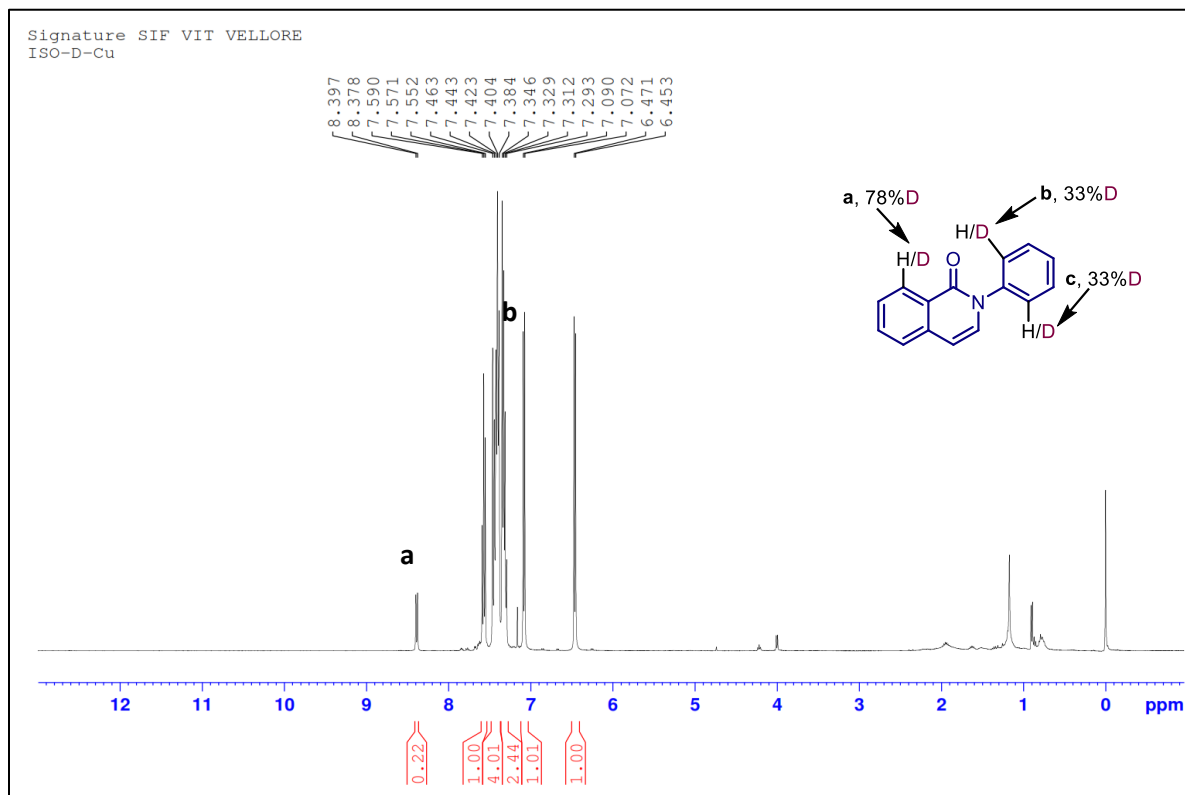

## 6.2 Radical inhibition experiment

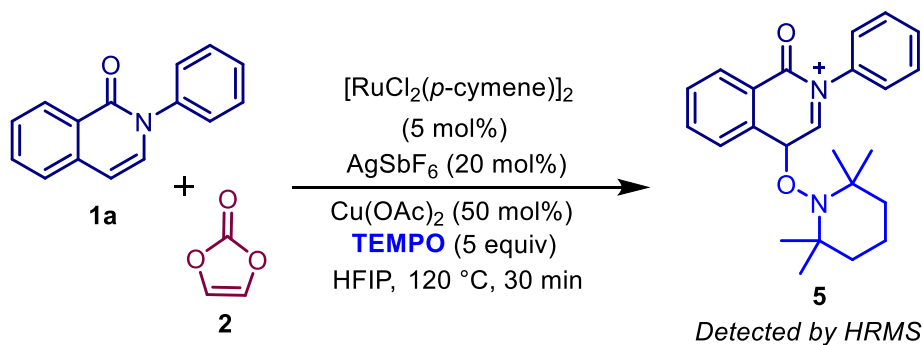

**Scheme S6.** Radical inhibition experiment

To an oven-dried Schlenk tube (15 mL) equipped with a stir bar, 1 mL of HFIP and isoquinolinone **1a** (2 equiv) were added. To this reaction mixture, vinylene carbonate **2** (0.58 mmol, 1 equiv.),  $[\text{Ru}(p\text{-cymene})\text{Cl}_2]_2$  (5 mol%),  $\text{AgSbF}_6$  (20 mol%),  $\text{Cu}(\text{OAc})_2$  (50 mol%) and TEMPO (5 equiv) were added. The tube was flushed with nitrogen and screw capped under nitrogen flow and placed in a preheated oil bath at 120 °C for 30 min. This reaction mixture was subjected to mass spectrometry analysis (ESI-HRMS) (Scheme S6).

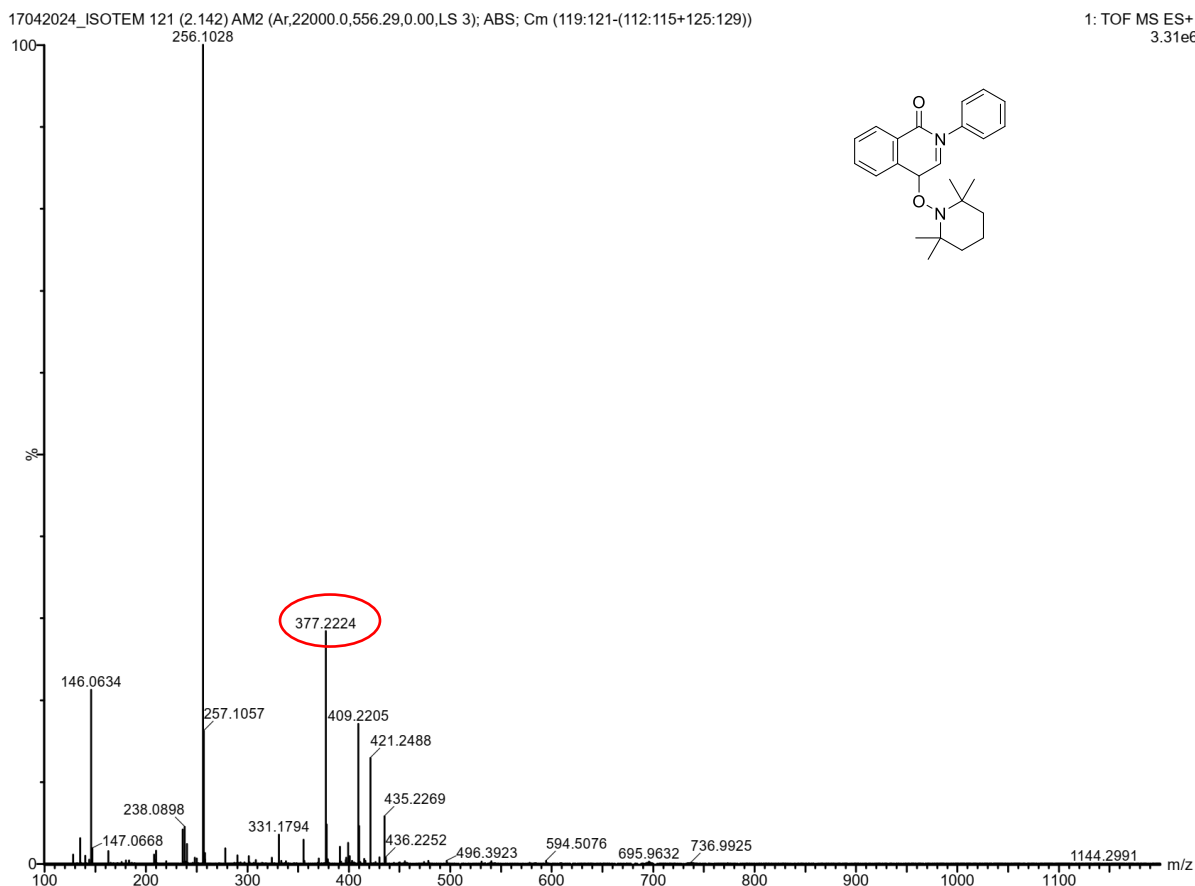

### 6.3 Reaction with 4,5-Dimethyl-1,3-dioxol-2-one.

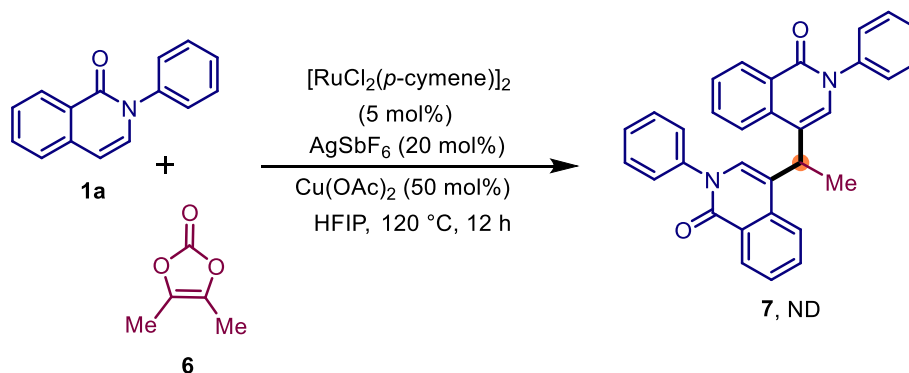

**Scheme S7.** Reaction of isoquinolinone with derivative of vinylene carbonate.

To an oven-dried Schlenk tube (15 mL) equipped with a stir bar, 1 mL of HFIP, **1a** (0.25 mmol, 1 equiv) and 4,5-Dimethyl-1,3-dioxol-2-one **6** (0.58 mmol, 1 equiv.) were added. To this reaction mixture,  $[\text{Ru}(p\text{-cymene})\text{Cl}_2]_2$  (5 mol%),  $\text{AgSbF}_6$  (20 mol%) and  $\text{Cu}(\text{OAc})_2$  (50 mol%) were added. The tube was flushed with nitrogen and screw capped under nitrogen flow and placed in a preheated oil bath at 120 °C for 24 h. After the indicated time, the reaction mixture was cooled and concentrated. (Scheme S7).

### 6.4. Experimental proof for conversion of formyl group to methylene group

To an oven-dried Schlenk tube (15 mL) equipped with a stir bar, 1 mL of HFIP and diphenyl acetaldehyde **8** (0.25 mmol, 1 equiv) were added. To this reaction mixture,  $[\text{Ru}(p\text{-cymene})\text{Cl}_2]_2$  (5 mol%),  $\text{AgSbF}_6$  (20 mol%) and  $\text{Cu}(\text{OAc})_2$  (50 mol%) were added. The tube was flushed with nitrogen and screw capped under nitrogen flow and placed in a preheated oil bath at 120 °C for 24 h. After the indicated time, the reaction mixture was cooled and concentrated. The crude material was purified by column chromatography on silica gel (100-200 mesh) using *n*-hexane – ethyl acetate as eluent, to yield the title compound (Scheme S8).

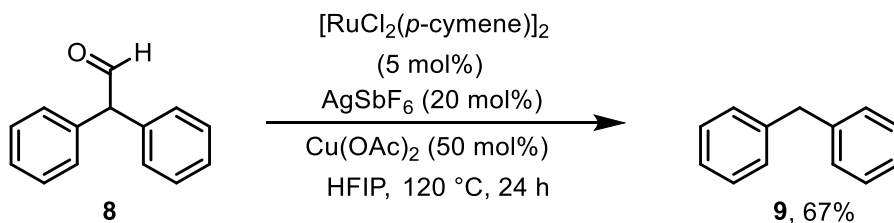

**Scheme S8.** Conversion of formyl group to methylene group

### 6.5. Experimental proof for conversion of carboxylic acid to methylene group

To an oven-dried Schlenk tube (15 mL) equipped with a stir bar, 1 mL of HFIP and diphenyl acetic acid **10** (0.23 mmol, 1 equiv) were added. To this reaction mixture,  $[\text{Ru}(p\text{-cymene})\text{Cl}_2]_2$  (5 mol%),  $\text{AgSbF}_6$  (20 mol%) and  $\text{Cu}(\text{OAc})_2$  (50 mol%) were added. The tube was flushed with nitrogen and screw capped under nitrogen flow and placed in a preheated oil bath at 120 °C for 24 h. After the indicated time, the reaction mixture was cooled and concentrated. The crude material was purified by column chromatography on silica gel (100-200 mesh) using *n*-hexane – ethyl acetate as eluent, to yield the title compound (Scheme S9).

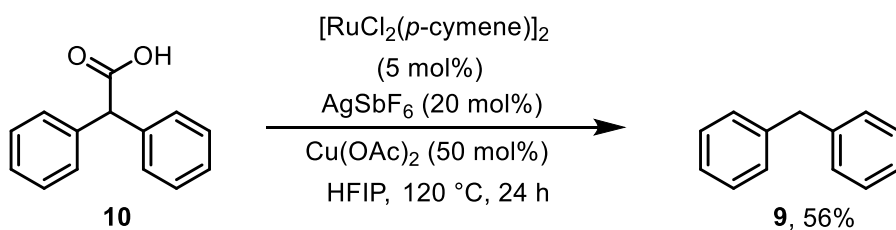

**Scheme S9.** Conversion of acid group to methylene group

## 7. Detection of CO<sub>2</sub> by GC-MS

To an oven-dried Schlenk tube (15 mL) equipped with a stir bar, 1 mL of HFIP, **1a** (0.25 mmol, 1 equiv) and vinylene carbonate **2** (0.58 mmol, 1 equiv.) were added. To this reaction mixture,  $[\text{Ru}(p\text{-cymene})\text{Cl}_2]_2$  (5 mol%),  $\text{AgSbF}_6$  (20 mol%) and  $\text{Cu}(\text{OAc})_2$  (50 mol%) were added. The tube was flushed with nitrogen and closed with septum, then placed in a preheated oil bath at 120 °C for 4 h. After the indicated time, the reaction mixture was cooled and gas inside the reaction tube was monitored with GC-MS.

At the first the air blank was loaded with atmospheric air to monitor the presence of carbon dioxide and then the sample air was loaded in which shown much higher peak of CO<sub>2</sub> as compared to the blank one. Hereby, in the attached chromatogram peak in orange colour shows airblank and other one in blue colour shows the sample peak.

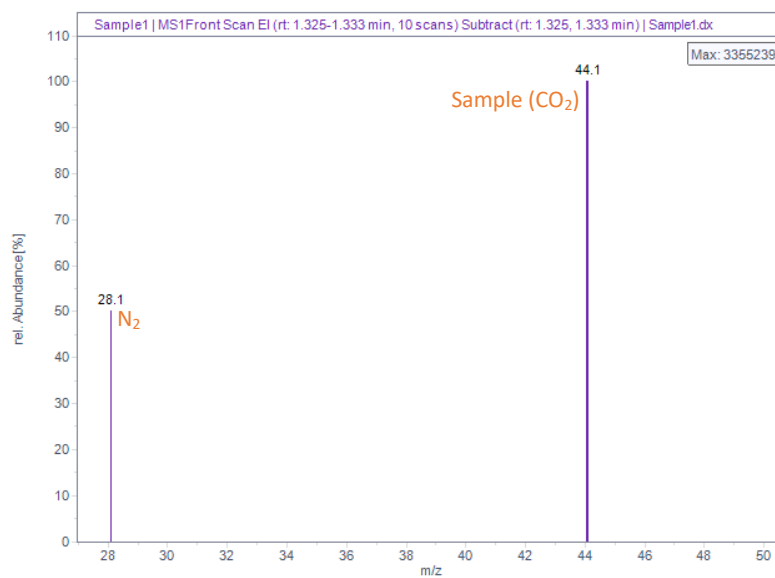

**Fig 3.** Mass spectrum for sample

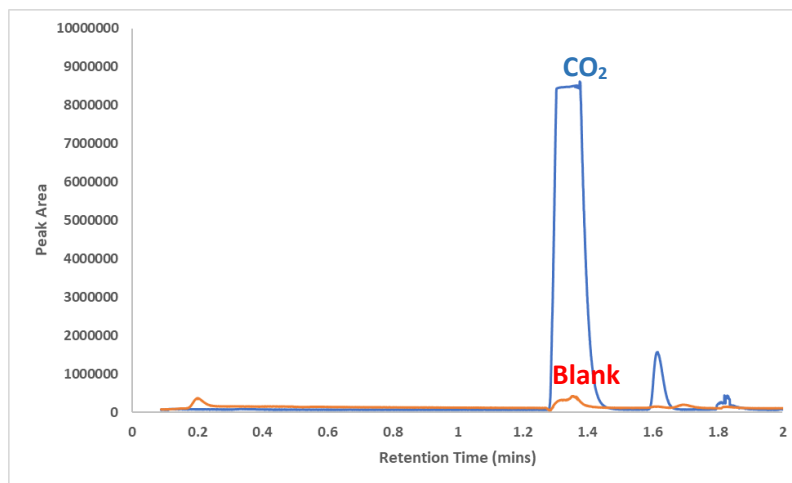

**Fig 4.** Chromatogram with mass filter from 42-47

## 8. Mass spectrometry studies for determining intermediates

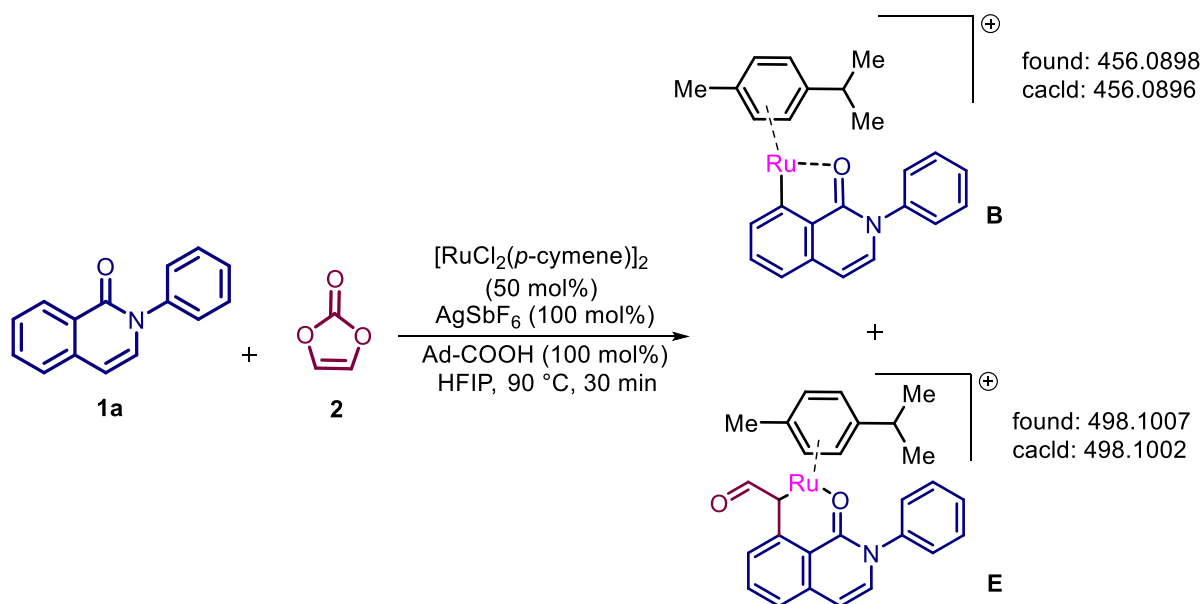

**Scheme S10.** Formyl methylation of isoquinolones

To an oven-dried Schlenk tube (15 mL) equipped with a stir bar was charged with 1 mL of HFIP and isoquinolinone **1a** (0.22 mmol, 2 equiv) and Vinylene carbonate **2** (1 equiv.) To this reaction mixture,  $[\text{Ru}(p\text{-cymene})\text{Cl}_2]_2$  (5 mol%),  $\text{AgSbF}_6$  (20 mol%) and  $\text{Cu}(\text{OAc})_2$  (50 mol%) .The tube was flushed with nitrogen and screw capped under nitrogen flow and placed in a preheated oil bath at 120 °C for 30 min. This reaction mixture was subjected to mass spectrometry analysis (ESI-HRMS) (Scheme S10).

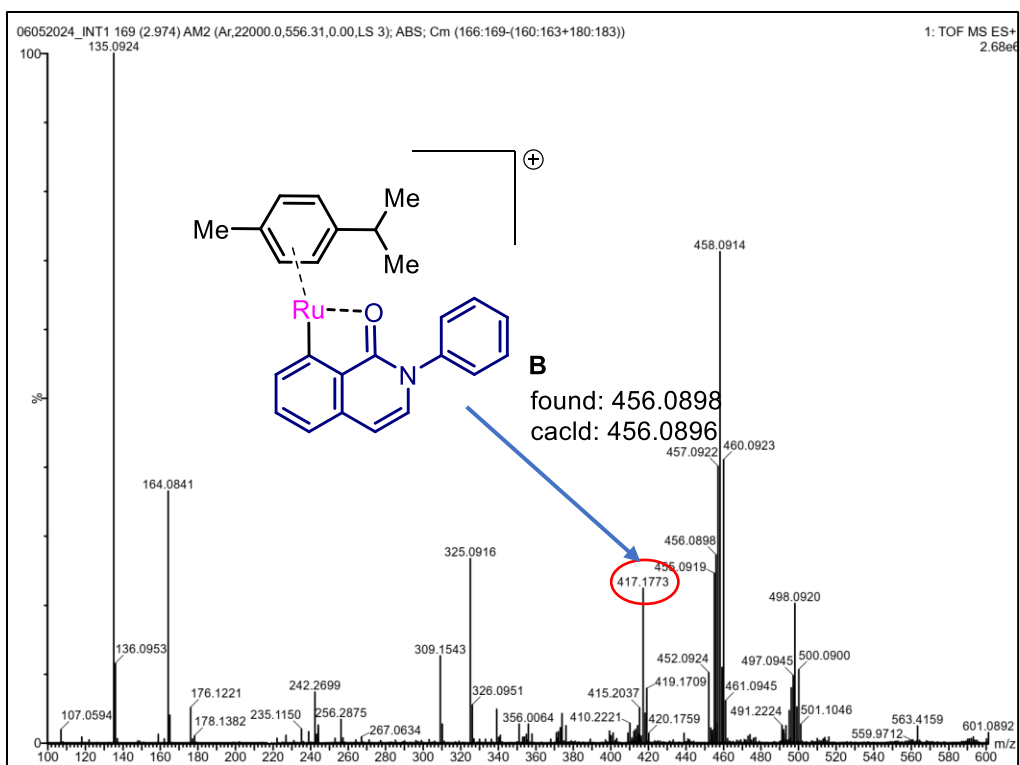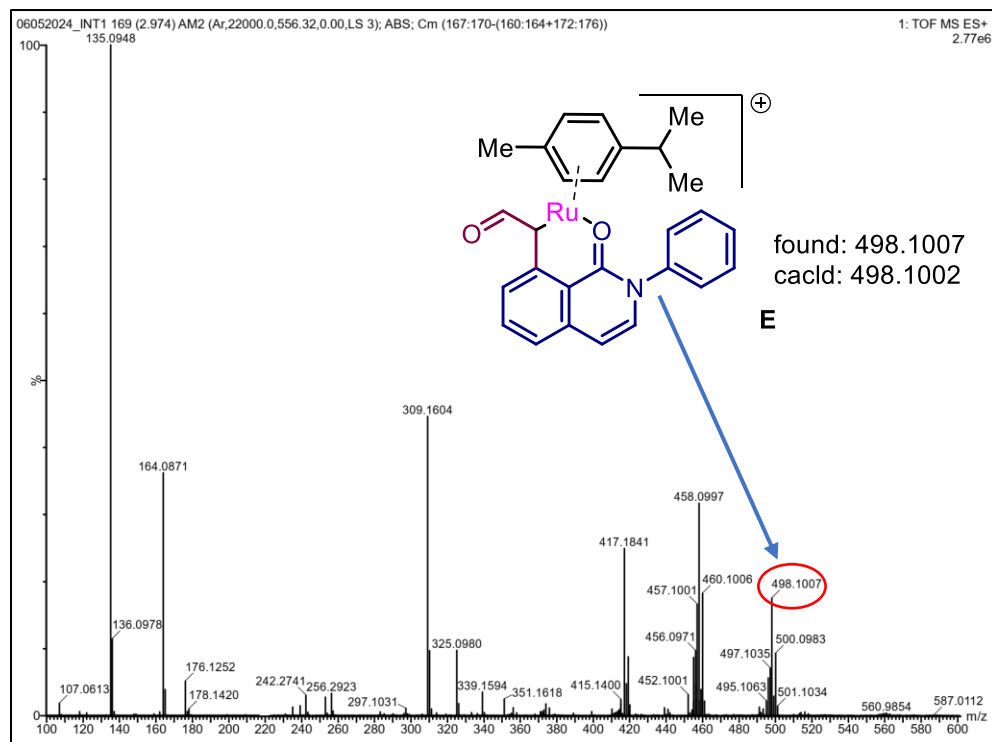

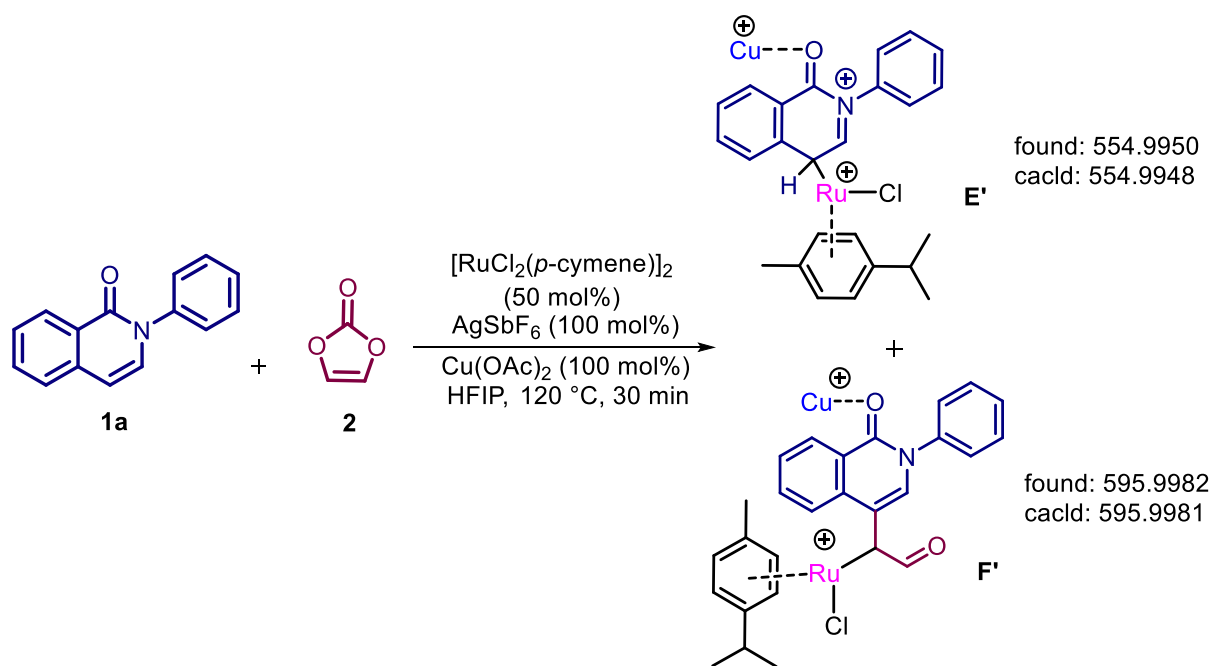

**Scheme S11.** Methylenation of isoquinolones

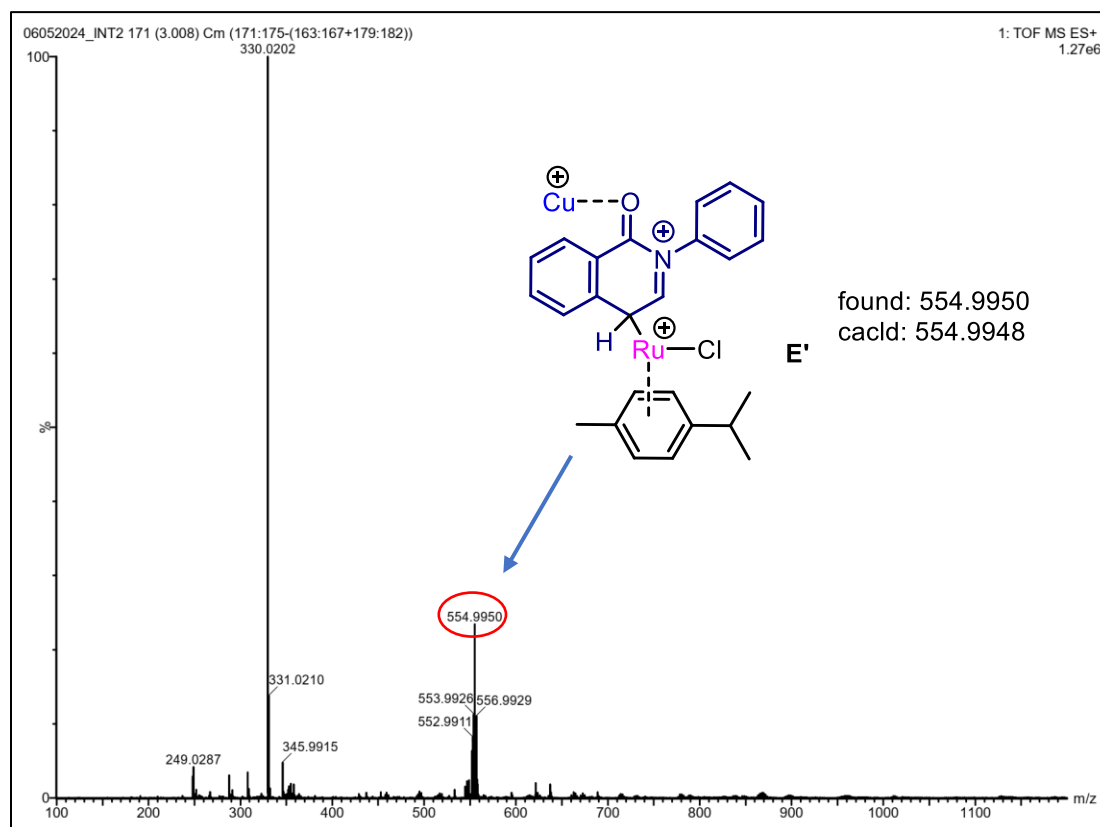

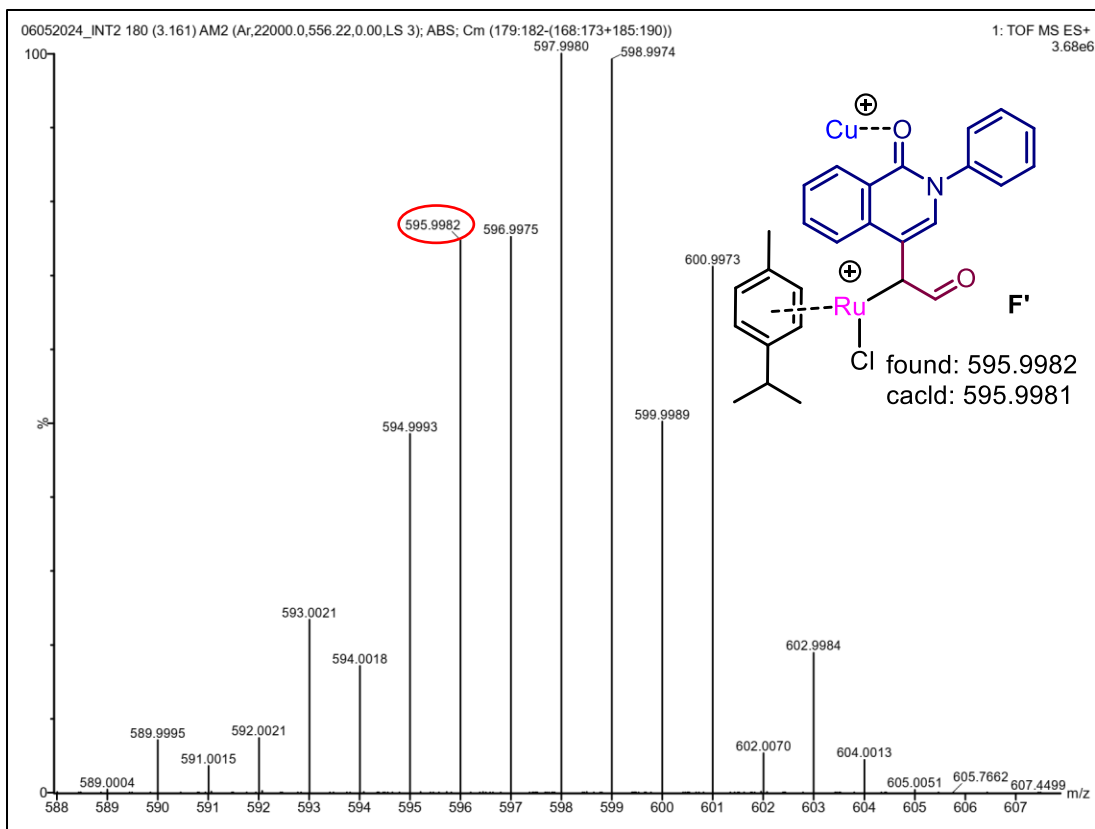

## 9. Characterization Data:

### 4,4'-methylenebis(2-phenylisoquinolin-1(2H)-one) (3a)

Purified by column chromatography on silica gel using (hexane/ethyl acetate = 80/20)

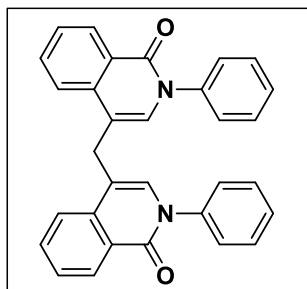

**Yield:** 38 mg, 78%, off-white coloured solid

Gram scale: 141 mg, 67%

**<sup>1</sup>H NMR (400 MHz, CDCl<sub>3</sub>)**  $\delta$ : 8.46 (d,  $J$  = 8.04 Hz, 2H), 7.64 (dt,  $J$  = 7.96 Hz, 2H), 7.60 (d,  $J$  = 7.88 Hz, 2H), 7.48 (t,  $J$  = 7.2 Hz, 2H), 7.33 (t,  $J$  = 7.6 Hz, 4H), 7.26 (t,  $J$  = 7.08 Hz, 2H), 7.2 (d,  $J$  = 7.9 Hz, 4H), 6.84 (s, 2H), 4.05 (s, 2H).

**<sup>13</sup>C{<sup>1</sup>H} NMR (100 MHz, CDCl<sub>3</sub>)**  $\delta$ : 161.6, 141.1, 136.4, 132.7, 131.5, 129.2, 129.0, 128.0, 127.4, 126.7, 126.6, 122.8, 112.6, 29.3.

**HR-MS:** [M+H]<sup>+</sup> calculated for C<sub>31</sub>H<sub>22</sub>N<sub>2</sub>O<sub>2</sub>, 477.1573 found, 477.1563.

#### 4,4'-methylenebis(2-(p-tolyl)isoquinolin-1(2H)-one) (3b)

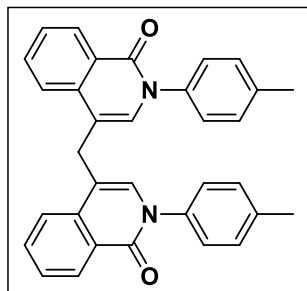

Purified by column chromatography on silica gel using (hexane/ethyl acetate = 84/16)

**Yield:** 27 mg, 54%, off-white coloured solid

**<sup>1</sup>H NMR (400 MHz, CDCl<sub>3</sub>) δ:** 8.47 (d, *J* = 8.04 Hz, 2H), 7.67 (dt, *J* = 8.0 Hz, 2H), 7.61 (d, *J* = 7.48 Hz, 2H), 7.50 (t, *J* = 7.0 Hz, 2H), 7.15 (d, *J* = 8.32 Hz, 4H), 7.09 (d, *J* = 8.32 Hz, 4H), 6.83 (s, 2H), 4.06 (s, 2H), 2.29 (s, 6H).

**<sup>13</sup>C{<sup>1</sup>H} NMR (100 MHz, CDCl<sub>3</sub>) δ:** 161.7, 138.5, 138.0, 136.4, 132.6, 131.7, 129.8, 129.0, 127.3, 126.6, 126.4, 122.84, 112.5, 29.3, 21.1.

**HR-MS:** [M+H]<sup>+</sup> calculated for C<sub>33</sub>H<sub>26</sub>N<sub>2</sub>NaO<sub>2</sub><sup>+</sup>, 505.1886; found, 505.1886.

#### 4,4'-methylenebis(2-(4-ethylphenyl)isoquinolin-1(2H)-one) (3c)

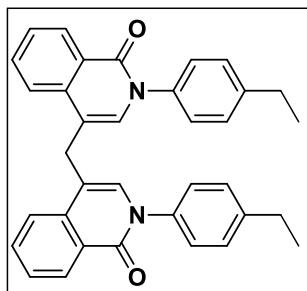

Purified by column chromatography on silica gel using (hexane/ethyl acetate = 80/20)

**Yield:** 36 mg, 71%, off-white coloured solid

**<sup>1</sup>H NMR (400 MHz, CDCl<sub>3</sub>) δ:** 8.46 (d, *J* = 8.0 Hz, 2H), 7.65 (t, *J* = 7.2 Hz, 2H), 7.60 (t, *J* = 5.64, 2H), 7.47 (t, *J* = 6.8 Hz, 2H), 7.16 (d, *J* = 8.32 Hz, 4H), 7.11 (d, *J* = 8.36 Hz, 4H), 6.83 (s, 2H), 4.04 (s, 2H), 2.61-2.55 (m, 4H), 1.15 (t, *J* = 7.52 Hz, 6H).

**<sup>13</sup>C{<sup>1</sup>H} NMR (100 MHz, CDCl<sub>3</sub>) δ:** 161.7, 144.2, 138.7, 136.4, 132.6, 131.7, 129.0, 128.7, 127.3, 126.6, 126.4, 122.8, 112.5, 29.3, 28.5, 15.4.

**HR-MS:** [M+Na]<sup>+</sup> calculated for C<sub>35</sub>H<sub>30</sub>N<sub>2</sub>O<sub>2</sub>Na, 534.2272; found, 534.2233.

#### 4,4'-methylenebis(2-(4-methoxyphenyl)isoquinolin-1(2H)-one) (3d)

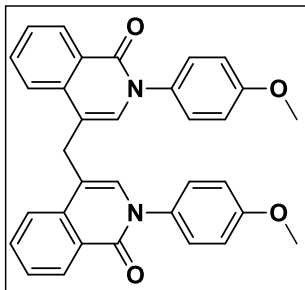

Purified by column chromatography on silica gel using (hexane/ethyl acetate = 84/16)

**Yield:** 28 mg, 56%, off-white coloured solid

**<sup>1</sup>H NMR (400 MHz, CDCl<sub>3</sub>) δ:** 8.44 (d, *J* = 7.64 Hz, 2H), 7.65 (td, *J* = 8.08 Hz, 2H), 7.61 (d, *J* = 7.2, 2H), 7.46 (td, *J* = 7.96 Hz, 2H), 7.11 (d, *J* = 8.8 Hz, 4H), 6.83 (s, 2H), 6.81 (d, *J* = 2.88, 4H), 4.03 (s, 2H), 3.70 (s, 6H)

**<sup>13</sup>C{<sup>1</sup>H} NMR (100 MHz, CDCl<sub>3</sub>) δ:** 161.9, 159.1, 136.4, 133.9, 132.6, 131.9, 128.9, 127.7, 127.3, 126.5, 122.8, 114.4, 112.5, 55.5, 29.3

**HR-MS:**  $[M+H]^+$  calculated for  $C_{33}H_{26}N_2O_4Na$ , 537.1785; found, 537.1772.

**4,4'-methylenebis(2-(4-(tert-butyl)phenyl)isoquinolin-1(2H)-one) (3e)**

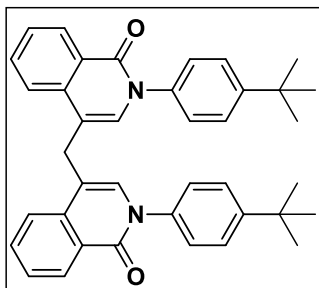

Purified by column chromatography on silica gel using (hexane/ethyl acetate = 84/16)

**Yield:** 24 mg, 48%, off-white coloured solid

**$^1H$  NMR (400 MHz,  $CDCl_3$ )  $\delta$ :** 8.49 (d,  $J$  = 7.88 Hz, 2H), 7.66 (td,  $J$  = 8.08 Hz, 2H), 7.61 (d,  $J$  = 7.24, 2H), 7.50 (td,  $J$  = 8.04 Hz, 2H), 7.37 (d,  $J$  = 8.56 Hz, 2H), 7.15 (d,  $J$  = 8.56 Hz, 2H), 6.86 (s, 2H), 4.06 (s, 2H), 1.25 (s, 18H)

**$^{13}C\{^1H\}$  NMR (100 MHz,  $CDCl_3$ )  $\delta$ :** 161.6, 141.0, 136.4, 132.7, 131.5, 129.2, 129.0, 128.1, 126.6, 126.6, 122.8, 112.6, 30.0, 29.7, 29.3.

**HR-MS:**  $[M+H]^+$  calculated for  $C_{39}H_{39}N_2O_2$ , 567.3006; found, 567.3007.

**4,4'-methylenebis(2-([1,1'-biphenyl]-4-yl)isoquinolin-1(2H)-one) (3f)**

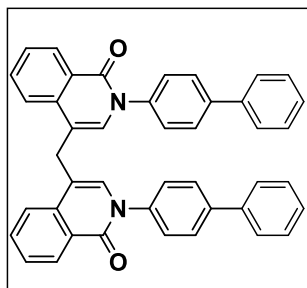

Purified by column chromatography on silica gel using (hexane/ethyl acetate = 84/16)

**Yield:** 12 mg, 36%, off-white coloured solid

**$^1H$  NMR (400 MHz,  $CDCl_3$ )  $\delta$ :** 8.52 (d,  $J$  = 7.92 Hz, 2H), 7.69 (td,  $J$  = 6.84 Hz, 2H), 7.65 (d,  $J$  = 7.2, 2H), 7.56 (d,  $J$  = 8.52 Hz, 4H), 7.51 (d,  $J$  = 7.12 Hz, 6H), 7.37 (t,  $J$  = 7.24, 4H), 7.31 (d,  $J$  = 8.44, 6H), 6.9 (s, 2H), 4.11 (s, 2H)

**$^{13}C\{^1H\}$  NMR (100 MHz,  $CDCl_3$ )  $\delta$ :** 161.7, 141.1, 140.1, 140.1, 136.4, 132.8, 131.4, 129.0, 128.8, 128.0, 127.7, 127.5, 127.2, 126.9, 126.5, 122.9, 112.8, 29.4

**HR-MS:**  $[M+H]^+$  calculated for  $C_{43}H_{31}N_2O_2$ , 607.2380; found, 607.2374.

**4,4'-methylenebis(2-(4-chlorophenyl)isoquinolin-1(2H)-one) (3g)**

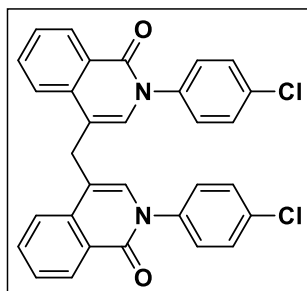

Purified by column chromatography on silica gel using (hexane/ethyl acetate = 80/20)

**Yield:** 37 mg, 73%, off-white coloured solid

**$^1H$  NMR (400 MHz,  $CDCl_3$ )  $\delta$ :** 8.45 (d,  $J$  = 7.96 Hz, 2H), 7.67 (dt,  $J$  = 8.12 Hz, 2H), 7.60 (d,  $J$  = 7.68, 2H), 7.50 (td,  $J$  = 7.12 Hz, 2H), 7.30 (d,  $J$  = 4.68 Hz, 2H), 7.15 (d,  $J$  = 8.68 Hz, 2H), 6.7 (s, 2H), 4.03 (s, 2H).

**$^{13}C\{^1H\}$  NMR (100 MHz,  $CDCl_3$ )  $\delta$ :** 161.5, 139.4, 133.9, 132.9, 131.0, 129.0, 129.0, 128.0, 127.6, 122.9, 112.9, 29.3.

**HR-MS:**  $[M+Na]^+$  calculated for  $C_{31}H_{21}Cl_2N_2O_2$ , 523.0975; found, 523.0975.

**4,4'-methylenebis(2-(3-(trifluoromethyl)phenyl)isoquinolin-1(2H)-one) (3h)**

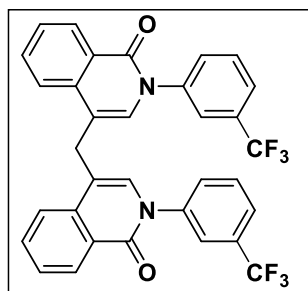

Purified by column chromatography on silica gel using (hexane/ethyl acetate = 84/16)

**Yield:** 30 mg, 60%, off-white coloured solid

**$^1H$  NMR (400 MHz,  $CDCl_3$ )  $\delta$ :** 8.44 (d,  $J$  = 7.52 Hz, 2H), 7.70 (td,  $J$  = 8.16 Hz, 2H), 7.62 (d,  $J$  = 7.64, 2H), 7.52 (d,  $J$  = 7.08 Hz, 4H), 7.52 (t,  $J$  = 6.84 Hz, 4H), 7.43 (d,  $J$  = 7.88 Hz, 2H), 6.81 (s, 2H), 4.09 (s, 2H).

**$^{13}C\{^1H\}$  NMR (100 MHz,  $CDCl_3$ )  $\delta$ :** 161.5, 141.3, 136.3, 133.1, 132.2, 131.9, 131.6, 131.3, 130.8, 130.2, 129.9, 129.0, 127.8, 126.4, 124.9, 124.8, 124.8, 124.8, 123.8, 123.8, 123.7, 123.0, 122.1, 113.2, 29.3.

**HR-MS:**  $[M+H]^+$  calculated for  $C_{33}H_{21}F_6N_2O_2$ , 591.1502; found, 591.1506.

**4,4'-methylenebis(2-(4-(trifluoromethyl)phenyl)isoquinolin-1(2H)-one) (3i)**

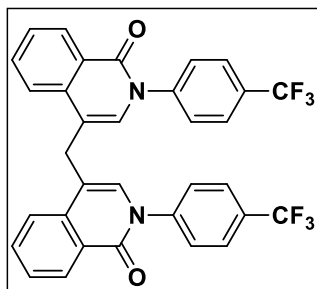

Purified by column chromatography on silica gel using (hexane/ethyl acetate = 84/16)

**Yield:** 32 mg, 64%, off-white coloured solid

**$^1H$  NMR (400 MHz,  $CDCl_3$ )  $\delta$ :** 8.45 (d,  $J$  = 8.0 Hz, 2H), 7.70 (td,  $J$  = 8.16 Hz, 2H), 7.62 (d,  $J$  = 7.84, 2H), 7.58 (d,  $J$  = 8.44 Hz, 4H), 7.52 (td,  $J$  = 7.08 Hz, 2H), 7.34 (d,  $J$  = 8.28 Hz, 4H), 6.81 (s, 2H), 4.08 (s, 2H).

**$^{13}C\{^1H\}$  NMR (100 MHz,  $CDCl_3$ )  $\delta$ :** 161.4, 143.8, 136.2, 133.1, 130.6, 130.3, 129.9, 129.6, 127.8, 127.7, 126.5, 126.4, 126.4, 126.4, 125.0, 123.0, 122.3, 113.2, 29.4.

**HR-MS:**  $[M+H]^+$  calculated for  $C_{33}H_{21}F_6N_2O_2$ , 591.1502; found, 591.1506.

**4,4'-(methylenebis(1-oxoisoquinoline-4,2(1H)-diyl))dibenzaldehyde (3j)**

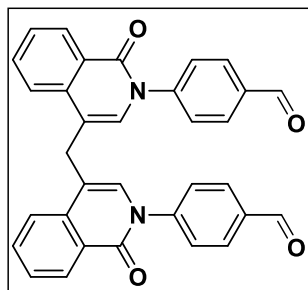

Purified by column chromatography on silica gel using (hexane/ethyl acetate = 84/16)

**Yield:** 17 mg, 36%, off-white coloured solid

**$^1H$  NMR (400 MHz,  $CDCl_3$ )  $\delta$ :** 9.96 (s, 2H), 8.48 (d,  $J$  = 8.0 Hz, 2H), 7.89(d,  $J$  = 8.48 Hz, 4H), 7.74 (td,  $J$  = 6.92 Hz, 2H), 7.65 (d,  $J$  = 7.52 Hz, 2H), 7.55 (td,  $J$  = 7.0 Hz, 2H), 7.43 (d,  $J$  = 8.36 Hz, 4H), 6.85 (s,

2H), 4.1 (s, 2H).

**$^{13}\text{C}\{^1\text{H}\}$  NMR (100 MHz,  $\text{CDCl}_3$ )  $\delta$ :** 199.09, 162.4, 141.4, 139.1, 136.4, 132.3, 132.2, 131.5, 129.4, 128.2, 126.9, 126.3, 124.3, 106.7, 50.4.

**HR-MS:**  $[\text{M}+\text{H}]^+$  calculated for  $\text{C}_{33}\text{H}_{23}\text{N}_2\text{O}_4$ , 511.1652; found, 511.1654.

#### 4,4'-methylenebis(2-(naphthalen-1-yl)isoquinolin-1(2H)-one) (3k)

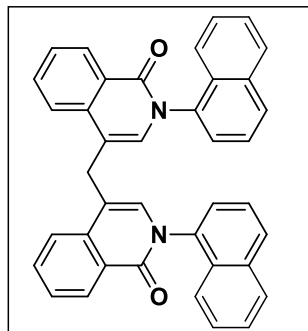

Purified by column chromatography on silica gel using (hexane/ethyl acetate = 84/16)

Yield: 27 mg, 54%, off-white coloured solid

**$^1\text{H}$  NMR (400 MHz,  $\text{CDCl}_3$ )  $\delta$ :** 8.45 (d,  $J = 7.92$  Hz, 2H), 7.83 (d,  $J = 8.0$ , 2H), 7.81 (d,  $J = 7.28$  Hz, 2H), 7.70 (s, 2H), 7.53 – 7.48 (m, 3H), 7.44 (d,  $J = 8.12$ , 2H), 7.40 – 7.37 (m, 2H), 7.34 (t,  $J = 6.44$  Hz, 2H), 7.26 (t,  $J = 7.12$  Hz, 1H), 7.21 (d,  $J = 4.92$  Hz, 2H), 7.18 (s, 1H), 7.05 (td,  $J = 7.28$  Hz, 1H), 6.8 (s, 2H), 4.1 (s, 2H).

**$^{13}\text{C}\{^1\text{H}\}$  NMR (100 MHz,  $\text{CDCl}_3$ )  $\delta$ :** 162.0, 162.0, 137.7, 137.5, 136.6, 134.4, 134.4, 132.8, 132.8, 132.5, 132.4, 129.5, 129.5, 129.3, 129.1, 128.5, 128.4, 127.4, 127.2, 127.2, 126.6, 126.6, 126.5, 126.5, 125.5, 125.4, 125.4, 122.9, 122.9, 122.2, 122.1, 112.6, 112.5, 29.3.

**HR-MS:**  $[\text{M}+\text{H}]^+$  calculated for  $\text{C}_{39}\text{H}_{27}\text{N}_2\text{O}_2$ , 555.2067; found, 555.2066.

#### 4,4'-methylenebis(2-(naphthalen-2-yl)isoquinolin-1(2H)-one) (3l)

Purified by column chromatography on silica gel using (hexane/ethyl acetate = 84/16)

Yield: 24mg, 48%, off-white coloured solid

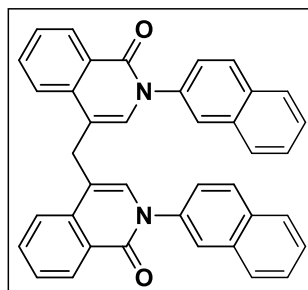

**$^1\text{H}$  NMR (400 MHz,  $\text{CDCl}_3$ )  $\delta$ :** 8.45 (d,  $J = 7.84$  Hz, 2H), 7.80 (d,  $J = 8.8$ , 2H), 7.77 (d,  $J = 3.56$  Hz, 2H), 7.70 (d,  $J = 1.08$ , 2H), 7.68 – 7.66 (m, 4H), 7.61 (s, 2H), 7.55 (t,  $J = 1.2$  Hz, 3H), 7.44 – 7.40 (m, 3H), 7.39 (d,  $J = 2$  Hz, 1H), 7.37 (d,  $J = 2$  Hz, 1H), 6.9 (s, 2H), 4.1 (s, 2H)

**$^{13}\text{C}\{^1\text{H}\}$  NMR (100 MHz,  $\text{CDCl}_3$ )  $\delta$ :** 161.8, 138.7, 136.5, 133.3, 132.8, 132.5, 131.8, 129.0, 128.0, 127.7, 127.4, 126.7, 126.7, 126.6, 125.0, 124.7, 122.9, 112.8, 29.4.

**HR-MS:**  $[\text{M}+\text{H}]^+$  calculated for  $\text{C}_{39}\text{H}_{27}\text{N}_2\text{O}_2$ , 555.2067; found, 555.2066.

#### 4,4'-methylenebis(2-butylisoquinolin-1(2*H*)-one (3m)

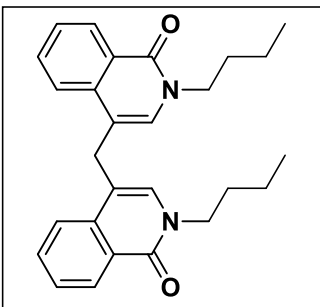

Purified by column chromatography on silica gel using (hexane/ethyl acetate = 85/15)

**Yield:** 42 mg, 82%, off-white coloured solid

**<sup>1</sup>H NMR (400 MHz, CDCl<sub>3</sub>) δ:** 8.46 (d, *J* = 8.0 Hz, 2H), 7.59 (t, *J* = 7.0 Hz, 2H), 7.53 (d, *J* = 7.76 Hz, 2H), 7.44 (t, *J* = 7.0 Hz, 2H), 6.62 (s, 2H), 3.99 (s, 2H), 3.81 (t, *J* = 7.2 Hz, 4H), 1.15 (m, 4H), 1.17 (m, 4H), 0.76 (t, *J* = 7.36, 6H).

**<sup>13</sup>C{<sup>1</sup>H} NMR (100 MHz, CDCl<sub>3</sub>) δ:** 160.7, 135.2, 131.1, 130.2, 127.4, 125.8, 125.2, 121.6, 111.4, 47.9, 30.1, 28.2, 18.7, 12.6.

**HR-MS:** [M+H]<sup>+</sup> calculated for C<sub>27</sub>H<sub>31</sub>N<sub>2</sub>O<sub>2</sub>, 415.2380; found, 415.2389.

#### 4,4'-methylenebis(2-isobutylisoquinolin-1(2*H*)-one) (3n)

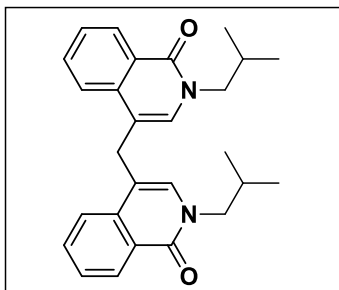

Purified by column chromatography on silica gel using (hexane/ethyl acetate = 84/16)

**Yield:** 35 mg, 68%, off-white coloured solid

**<sup>1</sup>H NMR (400 MHz, CDCl<sub>3</sub>) δ:** 8.44 (d, *J* = 7.96 Hz, 2H), 7.58 (td, *J* = 8.0 Hz, 2H), 7.51 (d, *J* = 7.36 Hz, 2H), 7.43 (td, *J* = 6.8 Hz, 2H), 6.5 (s, 2H), 3.9 (s, 2H), 3.5 (d, *J* = 7.4 Hz, 4H), 2.05-1.9 (m, 2H),

0.7 (d, *J* = 6.7 Hz, 12H).

**<sup>13</sup>C{<sup>1</sup>H} NMR (100 MHz, CDCl<sub>3</sub>) δ:** 161.9, 136.2, 132.2, 131.8, 128.5, 126.9, 126.2, 122.7, 112.1, 56.1, 29.1, 28.0, 19.8.

**HR-MS:** [M+H]<sup>+</sup> calculated for C<sub>27</sub>H<sub>31</sub>N<sub>2</sub>O<sub>2</sub>, 415.2380; found, 415.2385.

#### 4,4'-methylenebis(2-(cyclopropylmethyl)isoquinolin-1(2*H*)-one) (3o)

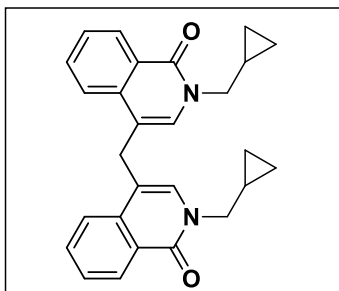

Purified by column chromatography on silica gel using (hexane/ethyl acetate = 84/16)

**Yield:** 34 mg, 67%, off-white coloured solid

**<sup>1</sup>H NMR (400 MHz, CDCl<sub>3</sub>) δ:** 8.45 (d, *J* = 8.08 Hz, 2H), 7.58 (td, *J* = 7.92 Hz, 2H), 7.56 (d, *J* = 7.32 Hz, 2H), 7.47 (td, *J* = 6.8 Hz, 2H), 6.75 (s, 2H), 4.04 (s, 2H), 3.7 (d, *J* = 7.08 Hz, 4H), 1.18 (s,

2H), 0.36-0.34 (m, 4H), 0.15-0.11 (m, 4H).

**<sup>13</sup>C{<sup>1</sup>H} NMR (100 MHz, CDCl<sub>3</sub>) δ:** 161.9, 136.3, 132.2, 130.9, 128.5, 126.9, 126.2, 122.7, 112.4, 53.0, 29.4, 10.6, 3.6.

**HR-MS:**  $[M+H]^+$  calculated for  $C_{27}H_{26}N_2O_2$ , 411.2067; found, 411.2069.

**4-((1-oxo-2-(p-tolyl)-1,2-dihydroisoquinolin-4-yl)methyl)-2-phenylisoquinolin-1(2H)-one (3p)**

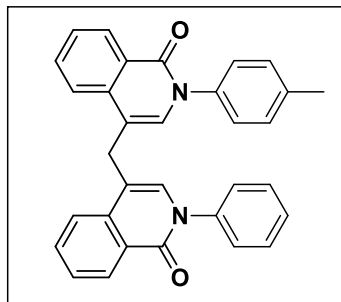

Purified by column chromatography on silica gel using (hexane/ethyl acetate = 84/16)

**Yield:** 12 mg, 23%, off-white coloured solid

**$^1H$  NMR (400 MHz,  $CDCl_3$ )  $\delta$ :** 8.48 (d,  $J$  = 7.76 Hz, 2H), 7.66 (dt,  $J$  = 6.92 Hz, 2H), 7.62 (d,  $J$  = 8.16 Hz, 2H), 7.50 (td,  $J$  = 6.88 Hz, 2H), 7.37 (t,  $J$  = 7.04 Hz, 2H), 7.29 (t,  $J$  = 7.56 Hz, 1H), 7.15 (d,  $J$  = 7.44 Hz, 2H), 7.15 (d,  $J$  = 8.28 Hz, 2H), 7.09 (d,  $J$  = 8.32 Hz, 2H),

6.86 (s, 1H), 6.83 (s, 1H), 4.07 (s, 2H), 2.29 (s, 3H).

**$^{13}C\{^1H\}$  NMR (100 MHz,  $CDCl_3$ )  $\delta$ :** 16179, 136.3, 136.3, 132.1, 132.1, 131.2, 131.2, 128.5, 1226.9, 126.3, 122.7, 122.6, 112.5, 112.4, 49.3, 49.0, 31.9, 31.2, 29.6, 29.5, 29.4, 29.3, 29.2, 29.2, 26.6, 22.6, 19.8, 19.1, 14.1, 13.6.

**HR-MS:**  $[M+H]^+$  calculated for  $C_{32}H_{25}N_2O_2$ , 469.1911; found, 469.1911.

**2-butyl-4-((2-decyl-1-oxo-1,2-dihydroisoquinolin-4-yl)methyl)isoquinolin-1(2H)-one (3q)**

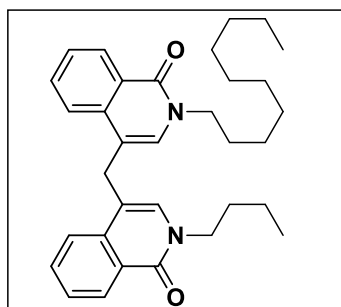

Purified by column chromatography on silica gel using (hexane/ethyl acetate = 84/16)

**Yield:** 13 mg, 23%, off-white coloured solid

**$^1H$  NMR (400 MHz,  $CDCl_3$ )  $\delta$ :** 8.45 (d,  $J$  = 7.88 Hz, 2H), 7.58 (td,  $J$  = 6.96 Hz, 2H), 7.54 (d,  $J$  = 4.8 Hz, 2H), 7.47 (td,  $J$  = 7.92 Hz, 2H), 6.62 (d,  $J$  = 8.4, 2H), 4.0 (s, 2H), 3.8-3.7 (m, 4H), 1.56-1.53 (m, 4H), 1.15 (d,  $J$  = 8.04, 16H), 0.81-0.75 (m, 6H).

**$^{13}C\{^1H\}$  NMR (100 MHz,  $CDCl_3$ )  $\delta$ :** 16179, 136.3, 136.3, 132.1, 132.1, 131.2, 131.2, 128.5, 1226.9, 126.3, 122.7, 122.6, 112.5, 112.4, 49.3, 49.0, 31.9, 31.2, 29.6, 29.5, 29.4, 29.3, 29.2, 29.2, 26.6, 22.6, 19.8, 19.1, 14.1, 13.6.

**HR-MS:**  $[M+H]^+$  calculated for  $C_{17}H_{15}N_2O_2$ , 279.1128; found, 279.1129.

**2-(1-oxo-2-phenyl-1,2-dihydroisoquinolin-8-yl)acetaldehyde (4a)**

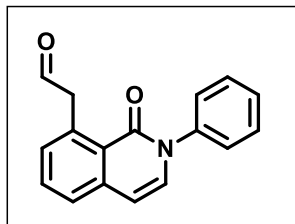

Purified by column chromatography on silica gel using (hexane/ethyl acetate = 84/16)

**Yield:** 36 mg, 61%, off-white coloured solid

**<sup>1</sup>H NMR (400 MHz, CDCl<sub>3</sub>) δ:** 9.80 (br, 1H), 7.53 (t, *J* = 7.84 Hz, 1H), 7.44 (td, *J* = 8.16 Hz, 2H), 7.41 (d, *J* = 1.52 Hz, 1H), 7.35 (td, *J* = 7.48 Hz, 1H), 7.32-7.30 (m, 1H), 7.22-7.29 (m, 1H), 7.16 (d, *J* = 7.16 Hz, 1H), 7.10 (d, *J* = 7.32 Hz, 1H), 6.49 (d, *J* = 7.76 Hz, 1H), 4.25 (s, 2H).s

**<sup>13</sup>C{<sup>1</sup>H} NMR (100 MHz, CDCl<sub>3</sub>) δ:** 199.0, 162.4, 141.4, 139.1, 136.4, 132.3 (d, *J* = 21.2 Hz), 131.5, 129.4, 128.2, 126.9, 126.3, 124.3, 106.7, 50.4.

**HR-MS:** [M+H]<sup>+</sup> calculated for C<sub>17</sub>H<sub>14</sub>NO<sub>2</sub>, 264.1019; found, 264.1060

#### 2-(2-(4-methoxyphenyl)-1-oxo-1,2-dihydroisoquinolin-8-yl)acetaldehyde (4b)

Purified by column chromatography on silica gel using (hexane/ethyl acetate = 84/16)

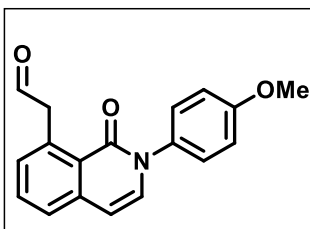

**Yield:** 36 mg, 63%, off-white coloured solid

**<sup>1</sup>H NMR (400 MHz, CDCl<sub>3</sub>) δ:** 9.79 (br, 1H), 7.53 (t, *J* = 7.52 Hz, 1H), 7.42 (dd, *J* = 6.92 Hz, 1H), 7.20 (d, *J* = 8.96 Hz, 2H), 7.15 (d, *J* = 7.04 Hz, 1H), 7.07 (d, *J* = 7.32 Hz, 1H), 6.92-6.90 (m, 2H), 6.46 (d, *J* = 7.36 Hz, 1H), 4.23 (s, 2H), 3.76 (s, 3H).

**<sup>13</sup>C{<sup>1</sup>H} NMR (100 MHz, CDCl<sub>3</sub>) δ:** 199.1, 162.6, 159.2, 139.1, 136.4, 134.2, 132.6, 132.1, 131.4, 128.0, 126.2, 124.3, 114., 106.5, 55.5, 50.4.

**HR-MS:** [M+H]<sup>+</sup> calculated for C<sub>18</sub>H<sub>16</sub>NO<sub>3</sub>, 294.1125; found, 294.1149.

#### 2-(2-(4-chlorophenyl)-1-oxo-1,2-dihydroisoquinolin-8-yl)acetaldehyde (4c)

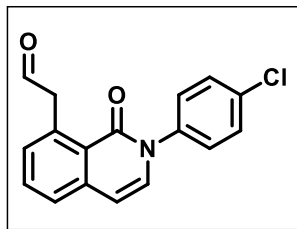

Purified by column chromatography on silica gel using (hexane/ethyl acetate = 84/16)

**Yield:** 32 mg, 54%, off-white coloured solid

**<sup>1</sup>H NMR (400 MHz, CDCl<sub>3</sub>) δ:** 9.80 (br, 1H), 7.56 (t, *J* = 8.12 Hz, 1H), 7.53 (d, *J* = 7.72 Hz, 1H), 7.44 (d, *J* = 7.92 Hz, 1H), 7.39 (d, *J* = 8.48 Hz, 2H), 7.25 (d, *J* = 8.44 Hz, 2H), 7.05 (d, *J* = 7.36 Hz, 1H), 6.50 (d, *J* = 7.4 Hz, 1H), 4.24 (s, 2H).

**<sup>13</sup>C{<sup>1</sup>H} NMR (100 MHz, CDCl<sub>3</sub>) δ:** 198.9, 162.3, 139.0, 136.4, 134.1, 132.4, 131.7, 131.7, 129.6, 128.3, 126.3, 107.1, 50.4.

**HR-MS:** [M+H]<sup>+</sup> calculated for C<sub>17</sub>H<sub>13</sub>ClNO<sub>2</sub>, 298.0629; found, 298.0623.

#### 2-(1-oxo-2-(p-tolyl)-1,2-dihydroisoquinolin-8-yl)acetaldehyde (4d)

Purified by column chromatography on silica gel using (hexane/ethyl acetate = 84/16)

**Yield:** 30 mg, 51%, off-white coloured solid

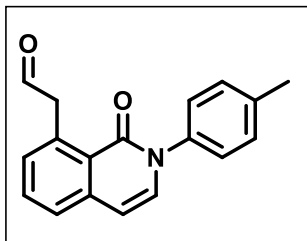

**<sup>1</sup>H NMR (400 MHz, CDCl<sub>3</sub>)**  $\delta$ : 9.68 (br, 1H), 7.54 (t,  $J$  = 7.76 Hz, 1H), 7.44 (d,  $J$  = 7.24 Hz, 1H), 7.23 (d,  $J$  = 8.32 Hz, 3H), 7.18 (d,  $J$  = 3.0 Hz, 2H), 7.10 (d,  $J$  = 7.32 Hz, 1H), 6.51 (d,  $J$  = 7.32 Hz, 1H), 4.22 (s, 2H), 2.3 (s, 3H).

**<sup>13</sup>C{<sup>1</sup>H} NMR (100 MHz, CDCl<sub>3</sub>)**  $\delta$ : 198.1, 161.4, 137.9, 137.2, 135.3, 131.4, 131.1, 130.4, 128.9, 127.9, 125.6, 125.2, 105.5, 49.4,

20.1.

**HR-MS:** [M+H]<sup>+</sup> calculated for C<sub>17</sub>H<sub>14</sub>NO<sub>2</sub>, 264.1019; found, 264.1060

## 2-(1-oxo-2-phenyl-1,2-dihydroisoquinolin-8-yl)acetaldehyde (4e)

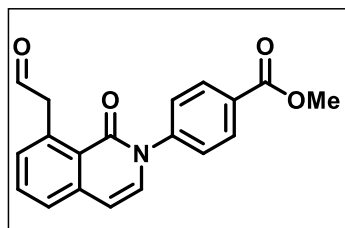

Purified by column chromatography on silica gel using (hexane/ethyl acetate = 84/16)

**Yield:** 17 mg, 34%, off-white coloured solid

**<sup>1</sup>H NMR (400 MHz, CDCl<sub>3</sub>)**  $\delta$ : 9.81 (br, 1H), 7.74 (t,  $J$  = 7.8 Hz, 1H), 7.63 (d,  $J$  = 4.24 Hz, 1H), (t,  $J$  = 7.6 Hz, 2H), 7.39 (d,  $J$  = 7.92 Hz, 2H), 7.13 (d,  $J$  = 7.32 Hz, 1H), 7.0 (d,  $J$  = 7.2 Hz, 1H), 4.2 (s, 3H), 3.4 (s, 2H).

**<sup>13</sup>C{<sup>1</sup>H} NMR (100 MHz, CDCl<sub>3</sub>)**  $\delta$ : 193.7, 172.3, 146.5, 139.4, 135.5, 132.6, 132.5, 132.0, 131.8, 131.6, 131.4, 131.1, 129.9, 126.5, 126.1, 109.8, 108.69, 106.2, 86.51, 39.01, 37.3.

**HR-MS:** [M+H]<sup>+</sup> calculated for C<sub>18</sub>H<sub>16</sub>NNaO<sub>3</sub><sup>2+</sup>, 317.1017; found, 317.1086.

## 2-(2-(naphthalen-2-yl)-1-oxo-1,2-dihydroisoquinolin-8-yl)acetaldehyde (4f)

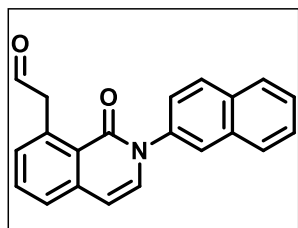

Purified by column chromatography on silica gel using (hexane/ethyl acetate = 84/16)

**Yield:** 30 mg, 53%, off-white coloured solid

**<sup>1</sup>H NMR (400 MHz, CDCl<sub>3</sub>)**  $\delta$ : 9.80 (br, 1H), 7.87 (d,  $J$  = 8.64 Hz, 1H), 7.81-7.76 (m, 3H), 7.73 (br, 1H), 7.53 (t,  $J$  = 7.72 Hz, 1H), 7.46 (s, 1H), 7.44-7.42 (m, 2H), 7.40 (d,  $J$  = 1.92 Hz, 1H), 7.17 (d,  $J$  = 6.8 Hz, 1H), 6.53 (d,  $J$  = 7.32 Hz, 1H), 4.25 (s, 2H).

**<sup>13</sup>C{<sup>1</sup>H} NMR (100 MHz, CDCl<sub>3</sub>)**  $\delta$ : 199.1, 162.6, 139.2, 139.0, 136.4, 133.5, 132.7, 132.4, 132.3, 131.5, 129.2, 128.0, 127.8, 126.8, 126.7, 126.3, 125.2, 125.0, 124.3, 106.9, 50.4.

**HR-MS:** [M+H]<sup>+</sup> calculated for C<sub>21</sub>H<sub>16</sub>NO<sub>2</sub>, 314.1176; found, 314.1205.

## 9.1. NMR data

### <sup>1</sup>H NMR of 3a

Signature SIF VIT VELLORE  
N-PHT-DUMER

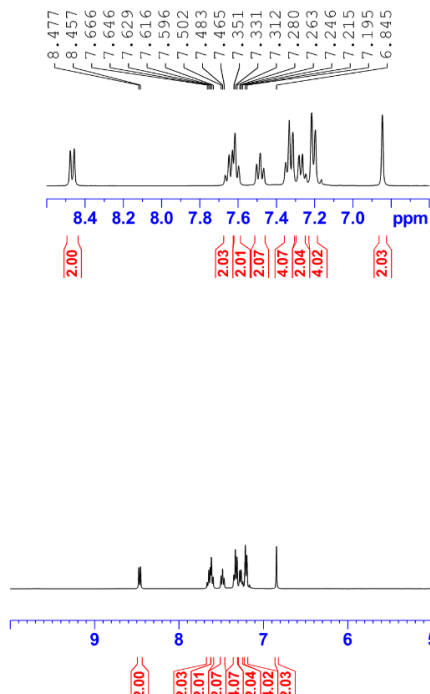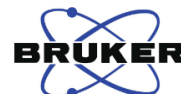

Current Data Parameters  
NAME H1  
EXPNO 87  
PROCNO 1

F2 - Acquisition Parameters  
Date 20230329  
Time 14.04 h  
INSTRUM spect  
PROBHD Z108618\_0505 (1  
PULPROG zg30  
TD 65536  
SOLVENT CDCl3  
NS 32  
DS 2  
SWH 8012.820 Hz  
FIDRES 0.244532 Hz  
AQ 4.0894465 sec  
RG 71.13  
DW 62.400 usec  
DE 6.50 usec  
TE 305.8 K  
D1 1.00000000 sec  
TD0 1  
SFO1 400.2604716 MHz  
NUC1 1H  
P1 15.00 usec  
PLW1 14.95499992 W

F2 - Processing parameters  
SI 65536  
SF 400.2580479 MHz  
WDW EM  
SSB 0  
LB 0.30 Hz  
GB 0  
PC 1.00

### <sup>13</sup>C NMR of 3a

Signature SIF VIT VELLORE  
N-PHE-DUMON

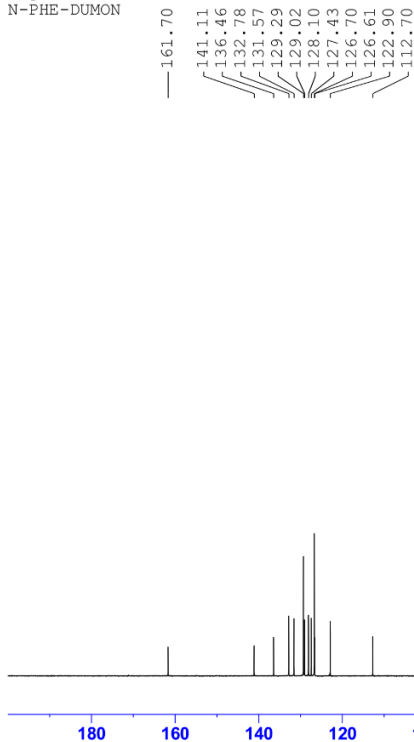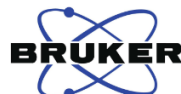

Current Data Parameters  
NAME C13  
EXPNO 91  
PROCNO 1

F2 - Acquisition Parameters  
Date 20230330  
Time 8.18 h  
INSTRUM spect  
PROBHD Z108618\_0505 (1  
PULPROG zgpg30  
TD 65536  
SOLVENT CDCl3  
NS 512  
DS 4  
SWH 24038.461 Hz  
FIDRES 0.733596 Hz  
AQ 1.3631488 sec  
RG 199.6  
DW 20.800 usec  
DE 6.50 usec  
TE 304.1 K  
D1 2.00000000 sec  
D11 0.03000000 sec  
TD0 1  
SFO1 100.6550186 MHz  
NUC1 13C  
P1 10.00 usec  
PLW1 58.22499847 W  
SFO2 400.2596010 MHz  
NUC2 1H  
CPDPRG2 waltz16  
PCPD2 90.00 usec  
PLM2 14.95499992 W  
PLM12 0.41542000 W  
PLM13 0.20895000 W

F2 - Processing parameters  
SI 32768  
SF 100.6449542 MHz  
WDW EM  
SSB 0  
LB 1.00 Hz  
GB 0  
PC 1.40

# <sup>1</sup>H NMR of 3b

Signature SIF VIT VELLORE  
4MEDIM

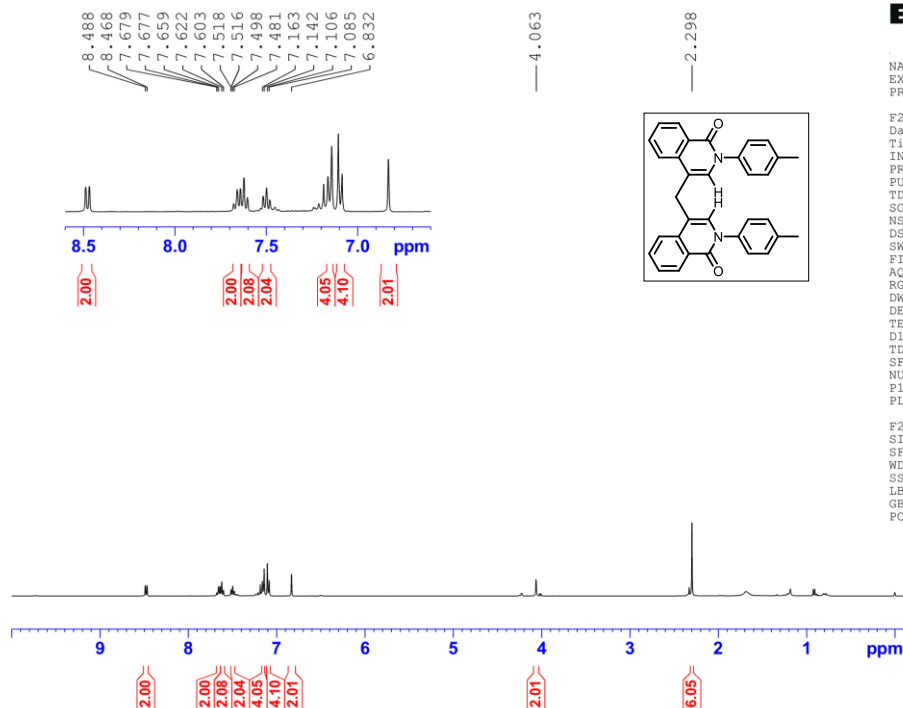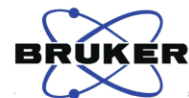

NAME Dr.GTV270624  
EXPNO 106  
PROCNO 1

F2 - Acquisition Parameters  
Date\_ 20240626  
Time\_ 20.18 h  
INSTRUM spect  
PROBHD Z108618\_0505 (   
PULPROG zg30  
TD 65536  
SOLVENT CDC13  
NS 16  
DS 2  
SWH 8012.820 Hz  
FIDRES 0.244532 Hz  
AQ 4.0894465 sec  
RG 156.91  
DW 62.400 usec  
DE 6.50 usec  
TE 303.8 K  
D1 1.00000000 sec  
TD0 1  
SFO1 400.2604716 MHz  
NUC1 1H  
P1 15.00 usec  
PLW1 15.21399975 W

F2 - Processing parameters  
SI 65536  
SF 400.2580396 MHz  
WDW EM  
SSB 0  
LB 0.30 Hz  
GB 0  
PC 1.00

# <sup>13</sup>C NMR of 3b

Signature SIF VIT VELLORE  
4MEDIM

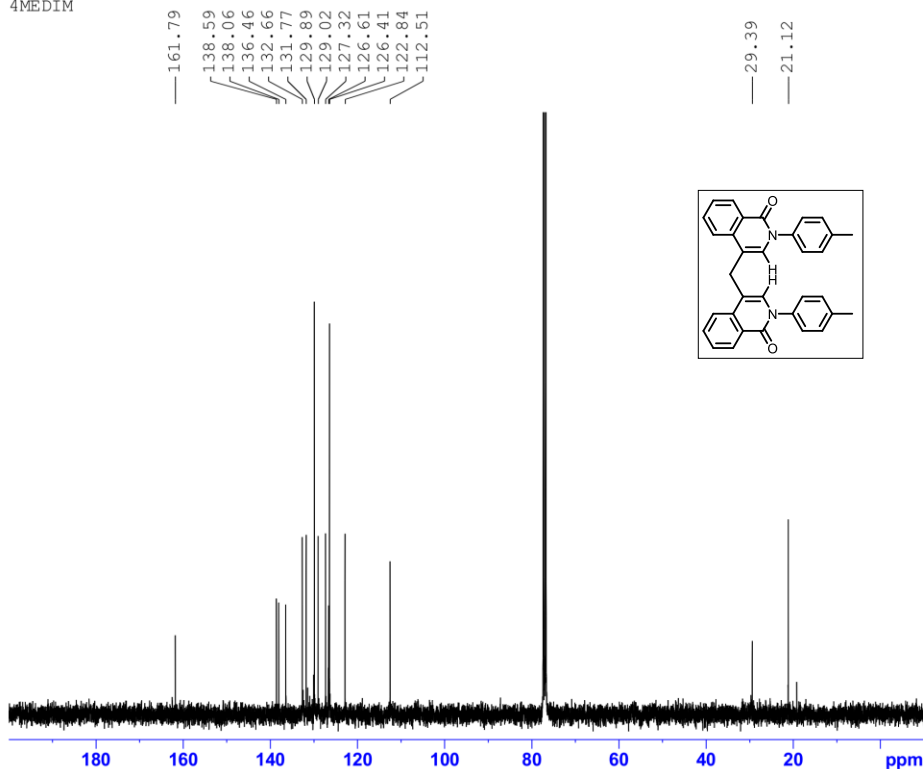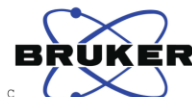

C  
NAME Dr.GTV270624  
EXPNO 107  
PROCNO 1

F2 - Acquisition Parameters  
Date\_ 20240626  
Time\_ 20.49 h  
INSTRUM spect  
PROBHD Z108618\_0505 (   
PULPROG zgpg30  
TD 65536  
SOLVENT CDC13  
NS 512  
DS 4  
SWH 24038.461 Hz  
FIDRES 0.733596 Hz  
AQ 1.3631488 sec  
RG 199.6  
DW 20.800 usec  
DE 6.50 usec  
TE 304.3 K  
D1 2.00000000 sec  
D11 0.03000000 sec  
TD0 1  
SFO1 100.6550186 MHz  
NUC1 13C  
P1 10.00 usec  
PLW1 56.49300003 W  
SFO2 400.2596010 MHz  
NUC2 1H  
CPDPRG2 waltz16  
PCPD2 90.00 usec  
PLW2 15.21399975 W  
PLW12 0.42261001 W  
PLW13 0.21257000 W

F2 - Processing parameters  
SI 32768  
SF 100.6449542 MHz  
WDW EM  
SSB 0  
LB 1.00 Hz  
GB 0  
PC 1.40

## <sup>1</sup>H NMR of 3c

Signature SIF VIT VELLORE  
4-ETHYL-DIMER

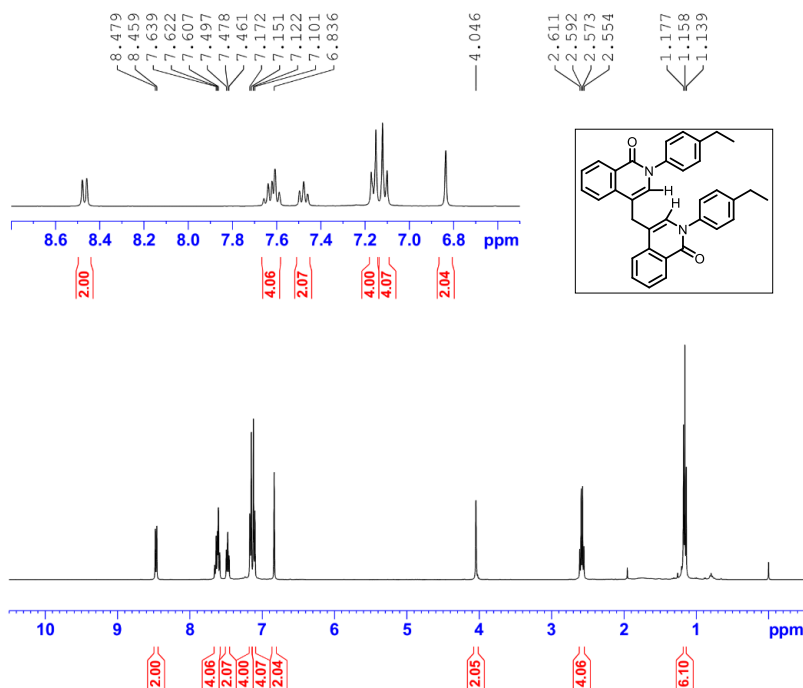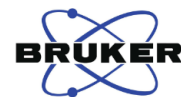

Current Data Parameters  
NAME Dr.GTV170823  
EXPNO 41  
PROCNO 1

F2 - Acquisition Parameters  
Date\_ 20230817  
Time\_ 18.38 h  
INSTRUM spect  
PROBHD Z108618\_0505 (   
PULPROG zg30  
TD 65536  
SOLVENT CDCl3  
NS 32  
DS 2  
SWH 8012.820 Hz  
FIDRES 0.244532 Hz  
AQ 4.0894465 sec  
RG 63.11  
DW 62.400 usec  
DE 6.50 usec  
TE 306.5 K  
D1 1.00000000 sec  
TD0 1  
SFO1 400.2604716 MHz  
NUC1 1H  
P1 15.00 usec  
PLW1 14.95499992 W

F2 - Processing parameters  
SI 65536  
SF 400.2580476 MHz  
WDW EM  
SSB 0  
LB 0.30 Hz  
GB 0  
PC 1.00

## <sup>13</sup>C NMR of 3c

Signature SIF VIT VELLORE  
4-ETHYL DIMER

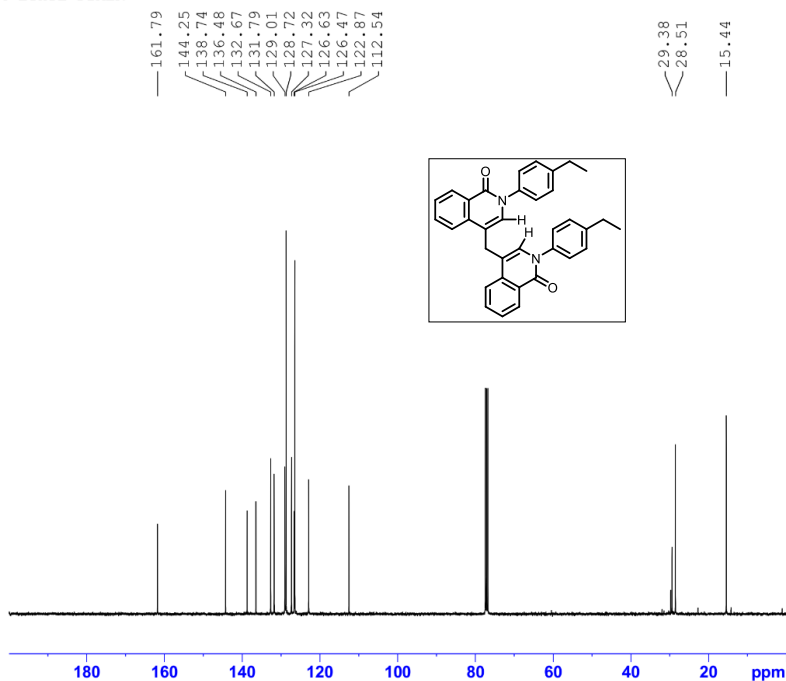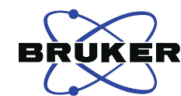

Current Data Parameters  
NAME Dr.GTV190823  
EXPNO 56  
PROCNO 1

F2 - Acquisition Parameters  
Date\_ 20230819  
Time\_ 20.57 h  
INSTRUM spect  
PROBHD Z108618\_0505 (   
PULPROG zgpg30  
TD 65536  
SOLVENT CDCl3  
NS 512  
DS 4  
SWH 24038.461 Hz  
FIDRES 0.733596 Hz  
AQ 1.3631488 sec  
RG 112.69  
DW 20.800 usec  
DE 6.50 usec  
TE 305.7 K  
D1 2.00000000 sec  
D11 0.03000000 sec  
TD0 1  
SFO1 100.6550186 MHz  
NUC1 13C  
P1 10.00 usec  
PLW1 58.22499847 W  
SFO2 400.2596010 MHz  
NUC2 1H  
CPDPRG2 waltz16  
PCPD2 90.00 usec  
PLW2 14.95499992 W  
PLW12 0.41542000 W  
PLW13 0.20895000 W

F2 - Processing parameters  
SI 32768  
SF 100.6449542 MHz  
WDW EM  
SSB 0  
LB 1.00 Hz  
GB 0  
PC 1.40

## <sup>1</sup>H NMR of 3d

Signature SIF VIT VELLORE

4-M2O-PHE-DEMEN

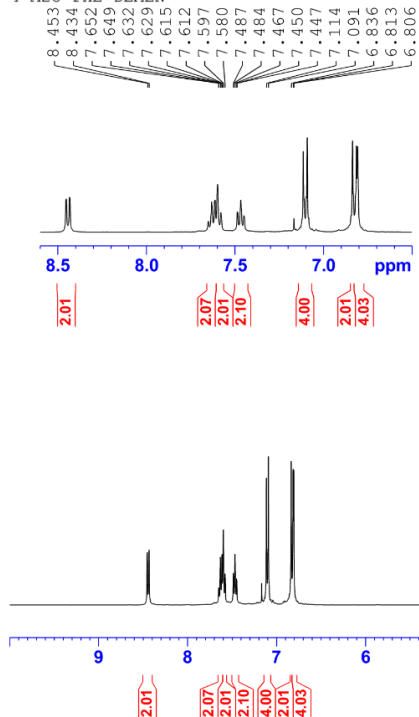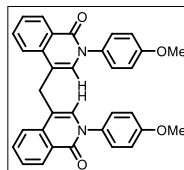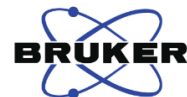

Current Data Parameters  
NAME Dr.NP030423  
EXPNO 54  
PROCNO 1

F2 - Acquisition Parameters  
Date\_ 20230403  
Time 10.22 h  
INSTRUM spect  
PROBHD Z108618\_0505 (zg30)  
PULPROG zg30  
TD 65536  
SOLVENT CDCl3  
NS 32  
DS 2  
SWH 8012.820 Hz  
FIDRES 0.244532 Hz  
AQ 4.089465 sec  
RG 58.47  
DW 62.400 usec  
DE 6.50 usec  
TE 303.3 K  
D1 1.0000000 sec  
TD0 1  
SFO1 400.2604716 MHz  
NUC1 1H  
P1 15.00 usec  
PLW1 14.95499992 W

F2 - Processing parameters  
SI 65536  
SF 400.2580471 MHz  
WDW EM  
SSB 0  
LB 0.30 Hz  
GB 0  
PC 1.00

## <sup>13</sup>C NMR of 3d

Signature SIF VIT VELLORE

4-MEO-N-PHE-DUMN

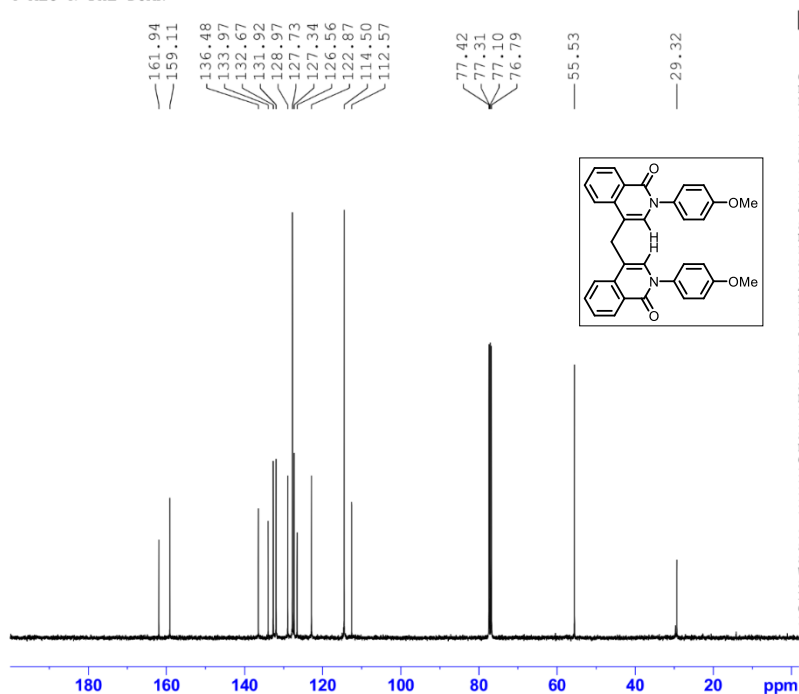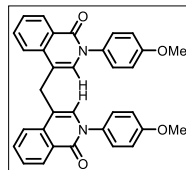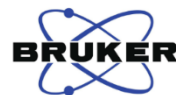

Current Data Parameters  
NAME Dr.GTV300323  
EXPNO 92  
PROCNO 1

F2 - Acquisition Parameters  
Date\_ 20230330  
Time 15.25 h  
INSTRUM spect  
PROBHD Z108618\_0505 (zgpg30)  
PULPROG zgpg30  
TD 65536  
SOLVENT CDCl3  
NS 512  
DS 4  
SWH 24038.461 Hz  
FIDRES 0.733596 Hz  
AQ 1.3631488 sec  
RG 199.6  
DW 20.800 usec  
DE 6.50 usec  
TE 305.7 K  
D1 2.00000000 sec  
D11 0.03000000 sec  
TD0 1  
SFO1 100.6550186 MHz  
NUC1 13C  
P1 10.00 usec  
PLW1 58.22499847 W  
SFO2 400.2596010 MHz  
NUC2 1H  
CPDPRG2 waltz16  
PCPD2 90.00 usec  
PLW2 14.95499992 W  
PLW12 0.41542000 W  
PLW13 0.20895000 W

F2 - Processing parameters  
SI 32768  
SF 100.6449542 MHz  
WDW EM  
SSB 0  
LB 1.00 Hz  
GB 0  
PC 1.40

## <sup>1</sup>H NMR of 3e

Signature SIF VIT VELLORE  
NP-4-TBU-DIMER

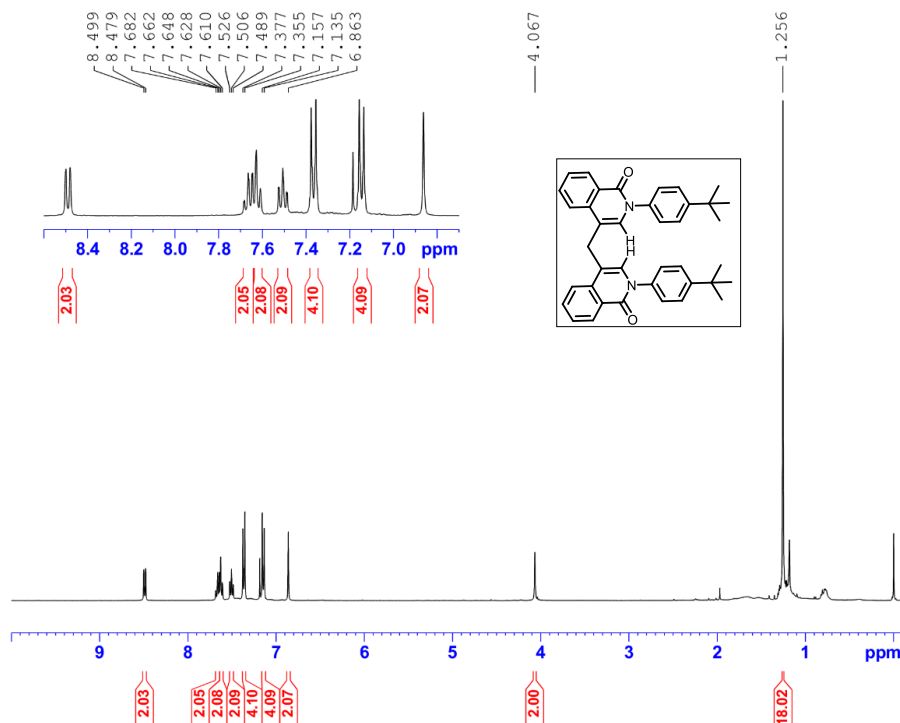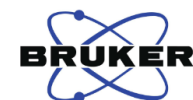

Current Data Parameters  
NAME Dr.NAP201023  
EXPNO 14  
PROCNO 1

F2 - Acquisition Parameters  
Date\_ 20231020  
Time 14.00 h  
INSTRUM spect  
PROBHD Z108618\_0505 (1  
PULPROG zg30  
TD 65536  
SOLVENT CDCl3  
NS 32  
DS 2  
SWH 8012.820 Hz  
FIDRES 0.244532 Hz  
AQ 4.0894465 sec  
RG 127.79  
DW 62.400 usec  
DE 6.50 usec  
TE 305.2 K  
D1 1.00000000 sec  
TD0 1  
SFO1 400.2604716 MHz  
NUC1 1H  
P1 15.00 usec  
PLW1 14.95499992 W

F2 - Processing parameters  
SI 65536  
SF 400.2580396 MHz  
WDW EM  
SSB 0  
LB 0.30 Hz  
GB 0  
PC 1.00

## <sup>13</sup>C NMR of 3e

Signature SIF VIT VELLORE  
N-7-TBU-DIMER

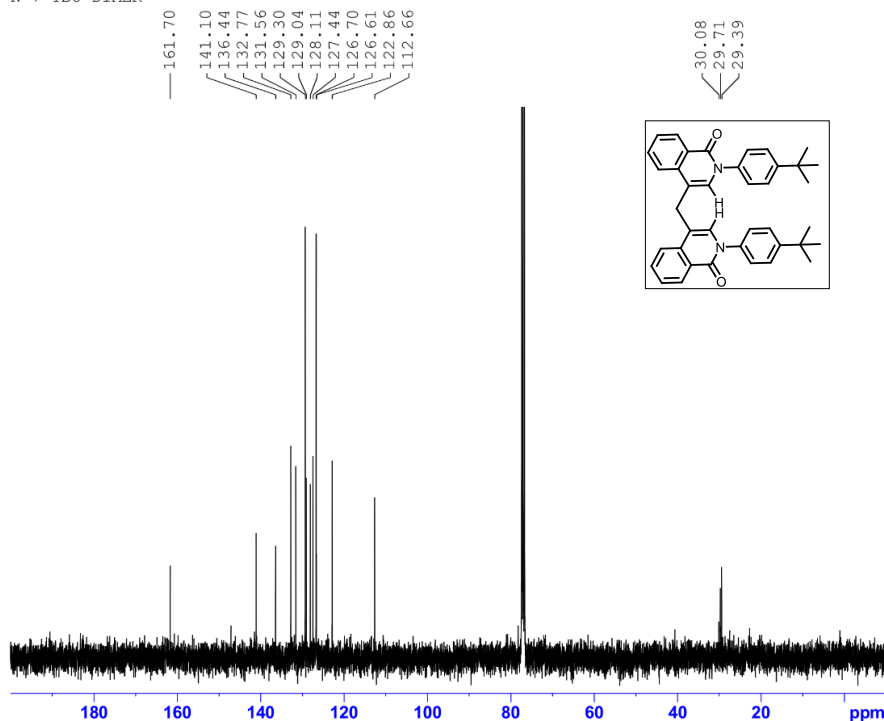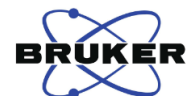

Current Data Parameters  
NAME Dr.GTV090124  
EXPNO 29  
PROCNO 1

F2 - Acquisition Parameters  
Date\_ 20240110  
Time 0.22 h  
INSTRUM spect  
PROBHD Z108618\_0505 (1  
PULPROG zgpg30  
TD 65536  
SOLVENT CDCl3  
NS 512  
DS 4  
SWH 24038.461 Hz  
FIDRES 0.733596 Hz  
AQ 1.3631488 sec  
RG 199.6  
DW 20.800 usec  
DE 6.50 usec  
TE 303.6 K  
D1 2.00000000 sec  
D11 0.03000000 sec  
TD0 1  
SFO1 100.6550186 MHz  
NUC1 13C  
P1 10.00 usec  
PLW1 56.49300003 W  
SFO2 400.2596010 MHz  
NUC2 1H  
CPDPRG2 waltz16  
PCPD2 90.00 usec  
PLW2 15.21399975 W  
PLW12 0.42261001 W  
PLW13 0.21257000 W

F2 - Processing parameters  
SI 32768  
SF 100.6449542 MHz  
WDW EM  
SSB 0  
LB 1.00 Hz  
GB 0  
PC 1.40

## <sup>1</sup>H NMR of 3f

Signature SIF VIT VELLORE  
NBIPED

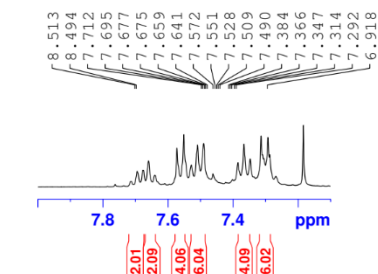

— 4.110

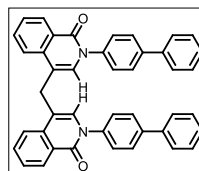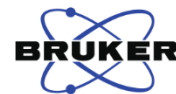

Current Data Parameters  
NAME Dr.GTV290724  
EXPNO 64  
PROCNO 1

F2 - Acquisition Parameters  
Date\_ 20240729  
Time\_ 15.29 h  
INSTRUM spect  
PROBHD Z108618\_0505 (4  
PULPROG zg30  
TD 65536  
SOLVENT CDCl3  
NS 32  
DS 2  
SWH 8012.820 Hz  
FIDRES 0.244532 Hz  
AQ 4.0894465 sec  
RG 143.73  
DW 62.400 usec  
DE 6.50 usec  
TE 303.7 K  
D1 1.00000000 sec  
TD0 1  
SFO1 400.2604716 MHz  
NUC1 1H  
P1 15.00 usec  
PLW1 15.21399975 W

F2 - Processing parameters  
SI 65536  
SF 400.2580404 MHz  
WDW EM  
SSB 0  
LB 0.30 Hz  
GB 0  
PC 1.00

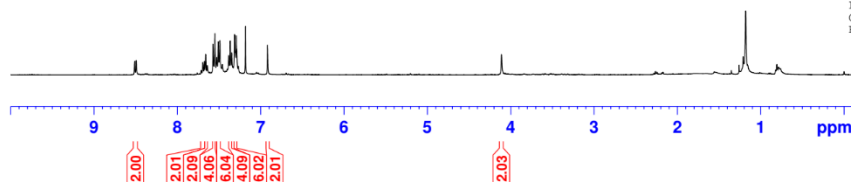

## <sup>13</sup>C NMR of 3f

Signature SIF VIT VELLORE  
N-BIPHE-DIMER

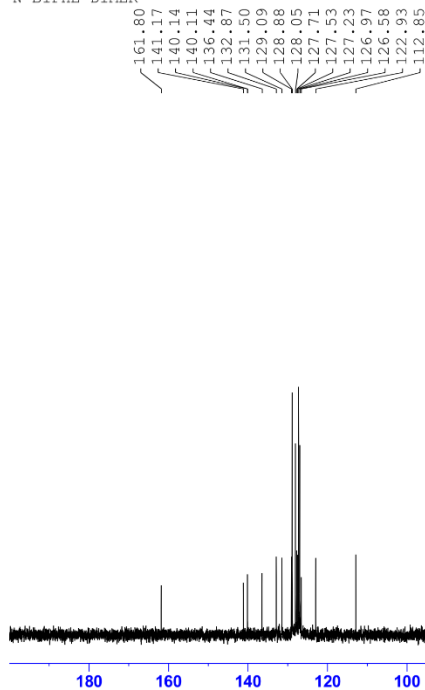

— 29.44

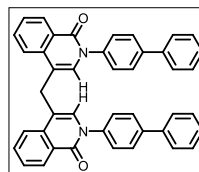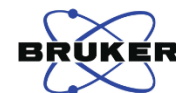

Current Data Parameters  
NAME Dr.GTV040124  
EXPNO 10  
PROCNO 1

F2 - Acquisition Parameters  
Date\_ 20240104  
Time\_ 20.34 h  
INSTRUM spect  
PROBHD Z108618\_0505 (4  
PULPROG zgpg30  
TD 65536  
SOLVENT CDCl3  
NS 512  
DS 4  
SWH 24038.461 Hz  
FIDRES 0.733596 Hz  
AQ 1.3631488 sec  
RG 156.91  
DW 20.800 usec  
DE 6.50 usec  
TE 301.1 K  
D1 2.00000000 sec  
D11 0.03000000 sec  
TD0 1  
SFO1 100.6550186 MHz  
NUC1 13C  
P1 10.00 usec  
PLW1 56.49300003 W  
SFO2 400.2596010 MHz  
NUC2 1H  
CPDPRG2 waltz16  
PCPD2 90.00 usec  
PLW2 15.21399975 W  
PLW12 0.42261001 W  
PLW13 0.21257000 W

F2 - Processing parameters  
SI 32768  
SF 100.6449542 MHz  
WDW EM  
SSB 0  
LB 1.00 Hz  
GB 0  
PC 1.40

## <sup>1</sup>H NMR of 3g

Signature SIF VIT VELLORE  
N-4-CL-ALD

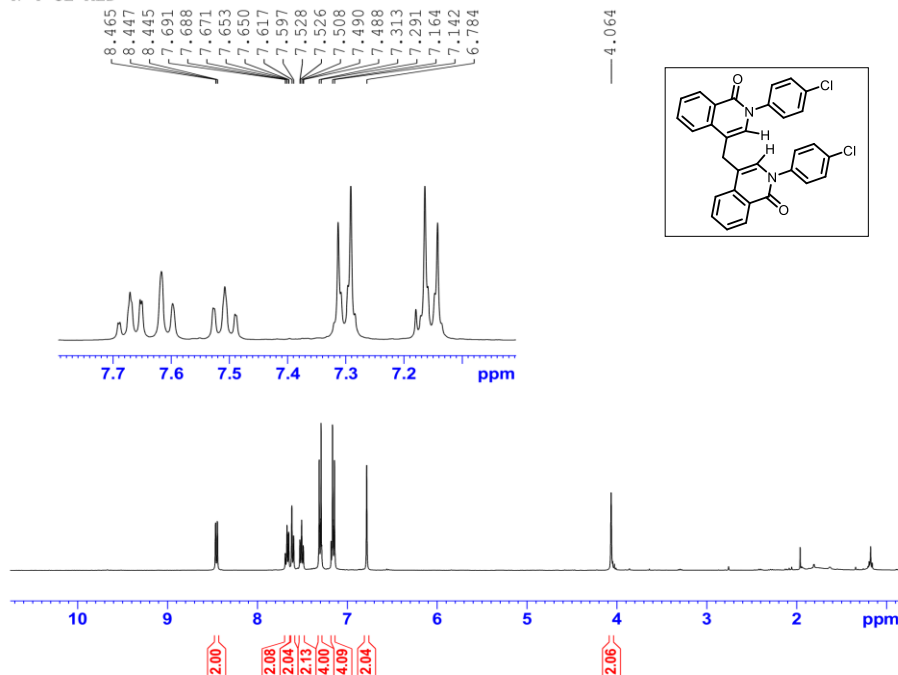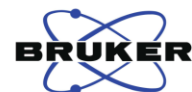

Current Data Parameters  
NAME Dr.LKA180323  
EXPNO 83  
PROCNO 1

F2 - Acquisition Parameters  
Date\_ 20230318  
Time 13.48 h  
INSTRUM spect  
PROBHD Z108618\_0505 ( )  
PULPROG zg30  
TD 65536  
SOLVENT CDCl3  
NS 32  
DS 2  
SWH 8012.820 Hz  
FIDRES 0.244532 Hz  
AQ 4.0894465 sec  
RG 88.69  
DW 62.400 usec  
DE 6.50 usec  
TE 303.9 K  
D1 1.0000000 sec  
TD0 1  
SFO1 400.2604716 MHz  
NUC1 1H  
P1 15.00 usec  
PLW1 14.95499992 W

F2 - Processing parameters  
SI 65536  
SF 400.2580418 MHz  
WDW EM  
SSB 0  
LB 0.30 Hz  
GB 0  
PC 1.00

## <sup>13</sup>C NMR of 3g

Signature SIF VIT VELLORE  
N-PHE-4-CT

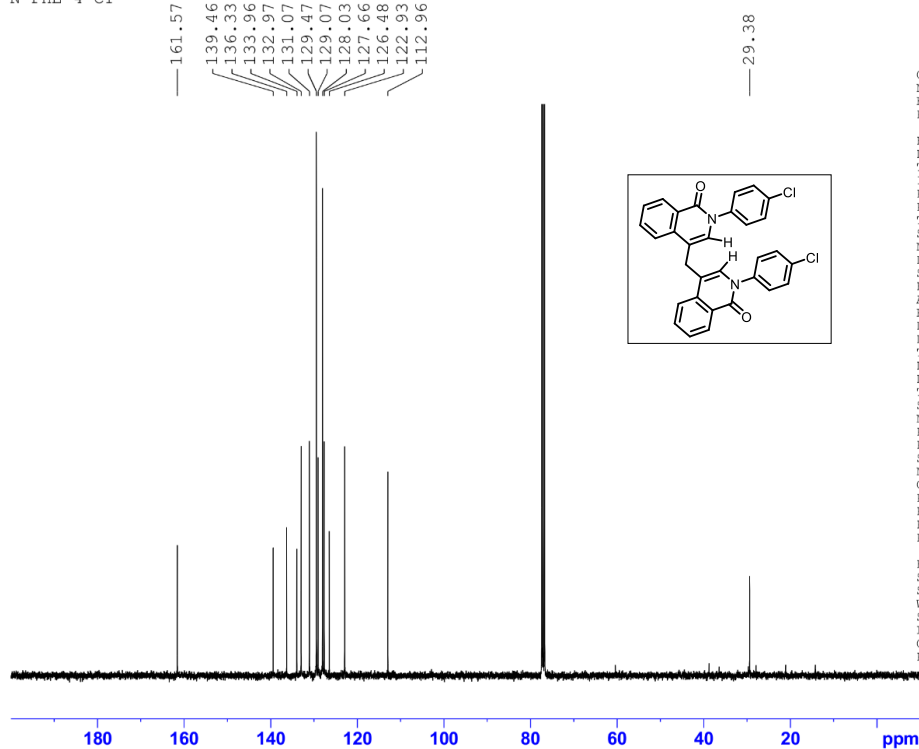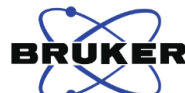

Current Data Parameters  
NAME C13  
EXPNO 58  
PROCNO 1

F2 - Acquisition Parameters  
Date\_ 20230320  
Time 19.12 h  
INSTRUM spect  
PROBHD Z108618\_0505 ( )  
PULPROG zgpg30  
TD 65536  
SOLVENT CDCl3  
NS 512  
DS 4  
SWH 24038.461 Hz  
FIDRES 0.733596 Hz  
AQ 1.3631488 sec  
RG 139.6  
DW 20.800 usec  
DE 6.50 usec  
TE 304.9 K  
D1 2.0000000 sec  
D11 0.0300000 sec  
TD0 1  
SFO1 100.6550186 MHz  
NUC1 13C  
P1 10.00 usec  
PLW1 58.22499847 W  
SFO2 400.2596010 MHz  
NUC2 1H  
CPDPRG[2] waltz16  
PCPD2 90.00 usec  
PLW2 14.95499992 W  
PLW12 0.41542000 W  
PLW13 0.20895000 W

F2 - Processing parameters  
SI 32768  
SF 100.6449542 MHz  
WDW EM  
SSB 0  
LB 1.00 Hz  
GB 0  
PC 1.40

## <sup>1</sup>H NMR of 3h

Signature SIF VIT VELLORE  
N-3-CF<sub>3</sub>-DIMER

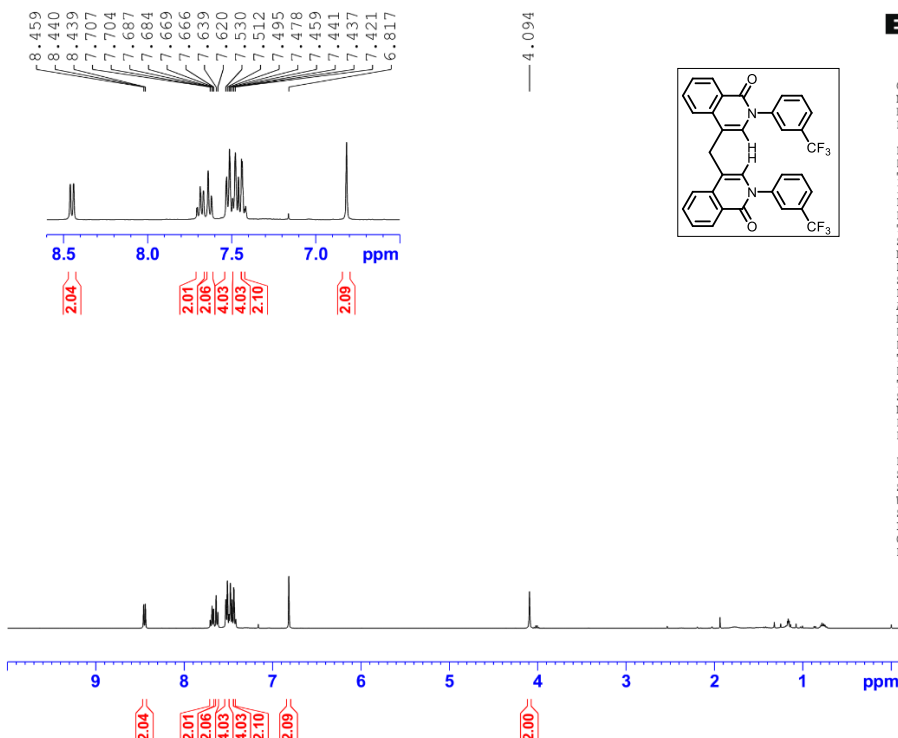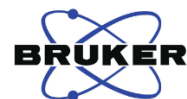

Current Data Parameters  
NAME Dr.RGL131023  
EXPNO 24  
PROCNO 1

F2 - Acquisition Parameters  
Date\_ 20231013  
Time 16.22 h  
INSTRUM spect  
PROBHD Z108618\_0505 ( )  
PULPROG zg30  
TD 65536  
SOLVENT CDCl3  
NS 32  
DS 2  
SWH 8012.820 Hz  
FIDRES 0.244532 Hz  
AQ 4.0894465 sec  
RG 58.47  
DW 62.400 usec  
DE 6.50 usec  
TE 305.1 K  
D1 1.00000000 sec  
TD0 1  
SFO1 400.2604716 MHz  
NUC1 1H  
P1 15.00 usec  
PLW1 14.95499992 W

F2 - Processing parameters  
SI 65536  
SF 400.2580488 MHz  
WDW EM  
SSB 0  
LB 0.30 Hz  
GB 0  
PC 1.00

## <sup>13</sup>C NMR of 3h

Signature SIF VIT VELLORE  
3-CF<sub>3</sub>-DIMER

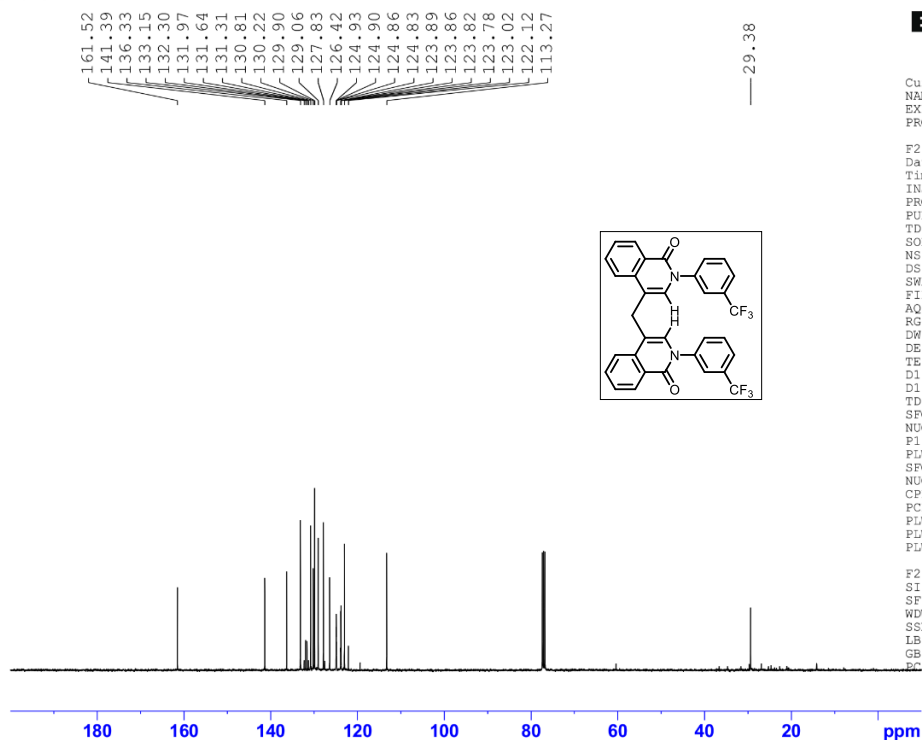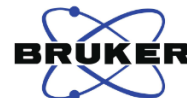

Current Data Parameters  
NAME Dr.GTV161023  
EXPNO 45  
PROCNO 1

F2 - Acquisition Parameters  
Date\_ 20231017  
Time 11.32 h  
INSTRUM spect  
PROBHD Z108618\_0505 ( )  
PULPROG zgpg30  
TD 65536  
SOLVENT CDCl3  
NS 512  
DS 4  
SWH 24038.461 Hz  
FIDRES 0.733596 Hz  
AQ 1.3631488 sec  
RG 199.6  
DW 20.800 usec  
DE 6.50 usec  
TE 306.2 K  
D1 2.00000000 sec  
D11 0.03000000 sec  
TD0 1  
SFO1 100.6550186 MHz  
NUC1 13C  
P1 10.00 usec  
PLW1 58.22499847 W  
SFO2 400.2596010 MHz  
NUC2 1H  
CPDPRG2 waltz16  
PCPD2 90.00 usec  
PLW2 14.95499992 W  
PLW12 0.41542000 W  
PLW13 0.20895000 W

F2 - Processing parameters  
SI 32768  
SF 100.6449542 MHz  
WDW EM  
SSB 0  
LB 1.00 Hz  
GB 0  
PC 1.40

# <sup>19</sup>F NMR of 3h

Signature SIF VIT VELLORE  
3-CF<sub>3</sub>-DIMER

— -62.65

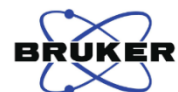

Current Data Parameters  
NAME Dr.GTV161023  
EXPNO 44  
PROCNO 1

F2 - Acquisition Parameters  
Date\_ 20231017  
Time\_ 11.00 h  
INSTRUM spect  
PROBHD Z108618\_0505 (   
PULPROG zgpg30  
TD 131072  
SOLVENT CDCl<sub>3</sub>  
NS 16  
DS 4  
SWH 89285.711 Hz  
FIDRES 1.362392 Hz  
AQ 0.7340032 sec  
RG 199.6  
DW 5.600 usec  
DE 6.50 usec  
TE 305.7 K  
D1 1.00000000 sec  
TDO 1  
SFO1 376.5811447 MHz  
NUC1 19F  
P1 15.00 usec  
PLW1 20.11800003 W

F2 - Processing parameters  
SI 65536  
SF 376.6188065 MHz  
WDW EM  
SSB 0  
LB 0.30 Hz  
GB 0  
PC 1.00

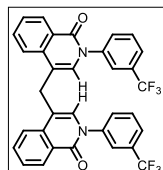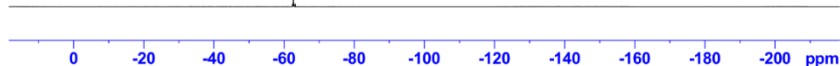

# <sup>1</sup>H NMR of 3i

Signature SIF VIT VELLORE  
N-4-CF<sub>3</sub>-DIMER

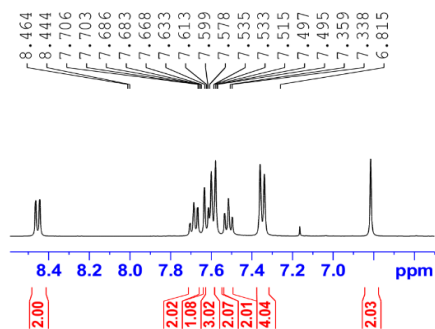

— 4.085

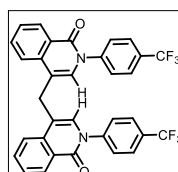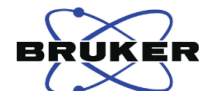

Current Data Parameters  
NAME Dr.GTV171023  
EXPNO 47  
PROCNO 1

F2 - Acquisition Parameters  
Date\_ 20231017  
Time\_ 18.02 h  
INSTRUM spect  
PROBHD Z108618\_0505 (   
PULPROG zgpg30  
TD 65536  
SOLVENT CDCl<sub>3</sub>  
NS 32  
DS 2  
SWH 8012.820 Hz  
FIDRES 0.244532 Hz  
AQ 4.0894465 sec  
RG 71.13  
DW 62.400 usec  
DE 6.50 usec  
TE 305.2 K  
D1 1.00000000 sec  
TDO 1  
SFO1 400.2604716 MHz  
NUC1 1H  
P1 15.00 usec  
PLW1 14.95499992 W

F2 - Processing parameters  
SI 65536  
SF 400.2580482 MHz  
WDW EM  
SSB 0  
LB 0.30 Hz  
GB 0  
PC 1.00

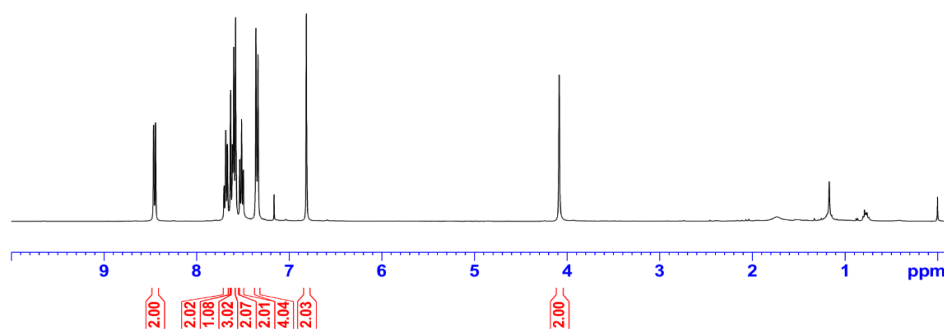

## <sup>13</sup>C NMR of 3i

Signature SIF VIT VELLORE  
N-4-CF<sub>3</sub>-DIMER

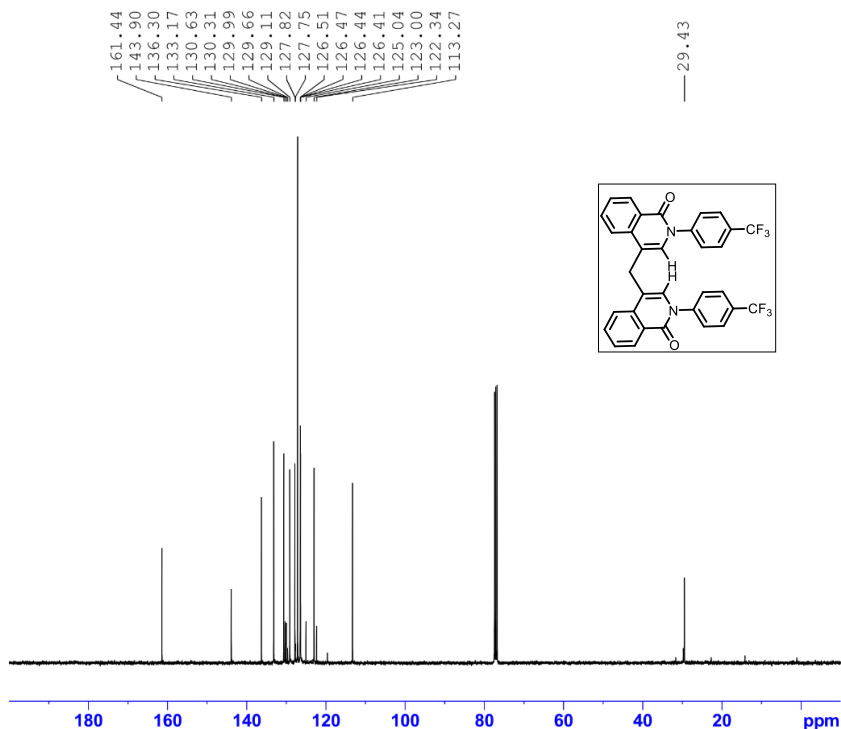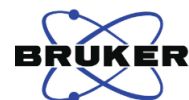

Current Data Parameters  
NAME Dr.GTV191023  
EXPNO 61  
PROCNO 1

F2 - Acquisition Parameters  
Date\_ 20231020  
Time 5.13 h  
INSTRUM spect  
PROBHD Z108618\_0505 ( )  
PULPROG zgpg30  
TD 65536  
SOLVENT CDCl<sub>3</sub>  
NS 512  
DS 4  
SWH 24038.461 Hz  
FIDRES 0.733296 Hz  
AQ 1.3631488 sec  
RG 199.6  
DW 20.800 usec  
DE 6.50 usec  
TE 306.8 K  
D1 2.00000000 sec  
D11 0.03000000 sec  
TD0 1  
SFO1 100.6550186 MHz  
NUC1 13C  
P1 10.00 usec  
PLW1 58.22499847 W  
SFO2 400.2596010 MHz  
NUC2 1H  
CPDPRG2 waltz16  
PCPD2 90.00 usec  
PLW2 14.95499992 W  
PLW12 0.41542000 W  
PLW13 0.20895000 W

F2 - Processing parameters  
SI 32768  
SF 100.6449542 MHz  
WDW EM  
SSB 0  
LB 1.00 Hz  
GB 0  
PC 1.40

## <sup>19</sup>F NMR of 3i

Signature SIF VIT VELLORE  
N-4-CF<sub>3</sub>-DIMER

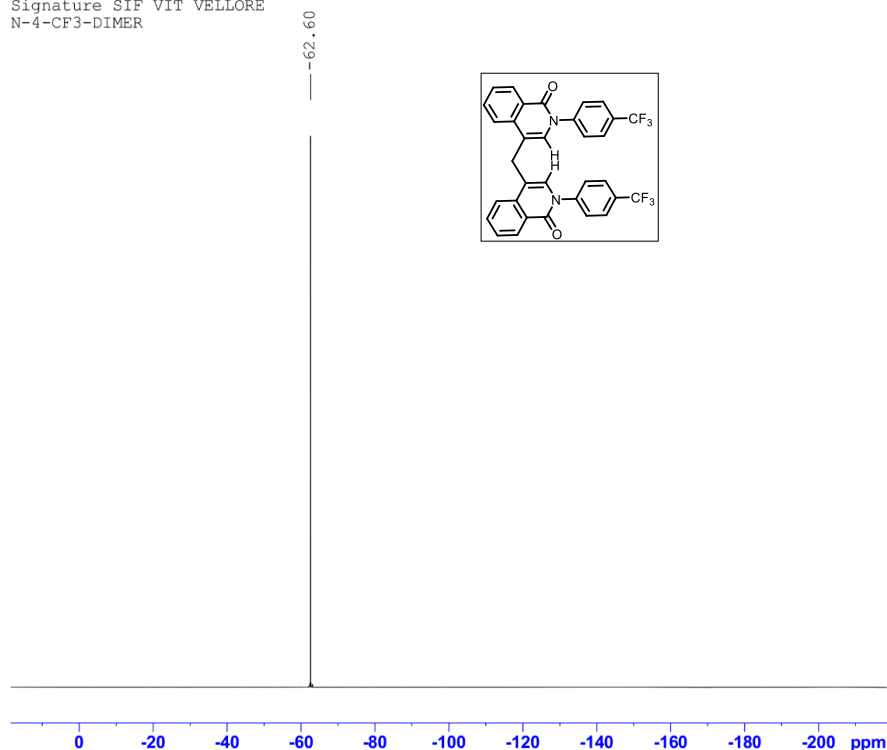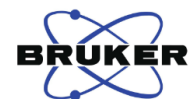

Current Data Parameters  
NAME Dr.GTV171023  
EXPNO 48  
PROCNO 1

F2 - Acquisition Parameters  
Date\_ 20231017  
Time 18.04 h  
INSTRUM spect  
PROBHD Z108618\_0505 ( )  
PULPROG zgflgn  
TD 131072  
SOLVENT CDCl<sub>3</sub>  
NS 16  
DS 4  
SWH 89285.711 Hz  
FIDRES 1.362392 Hz  
AQ 0.7340032 sec  
RG 199.6  
DW 5.600 usec  
DE 6.50 usec  
TE 305.3 K  
D1 1.00000000 sec  
TD0 1  
SFO1 376.5811447 MHz  
NUC1 19F  
P1 15.00 usec  
PLW1 20.1180003 W

F2 - Processing parameters  
SI 65536  
SF 376.6188065 MHz  
WDW EM  
SSB 0  
LB 0.30 Hz  
GB 0  
PC 1.00

## <sup>1</sup>H NMR of 3j

Signature SIF VIT VELLORE  
N-BENZ-OLD-DIMER

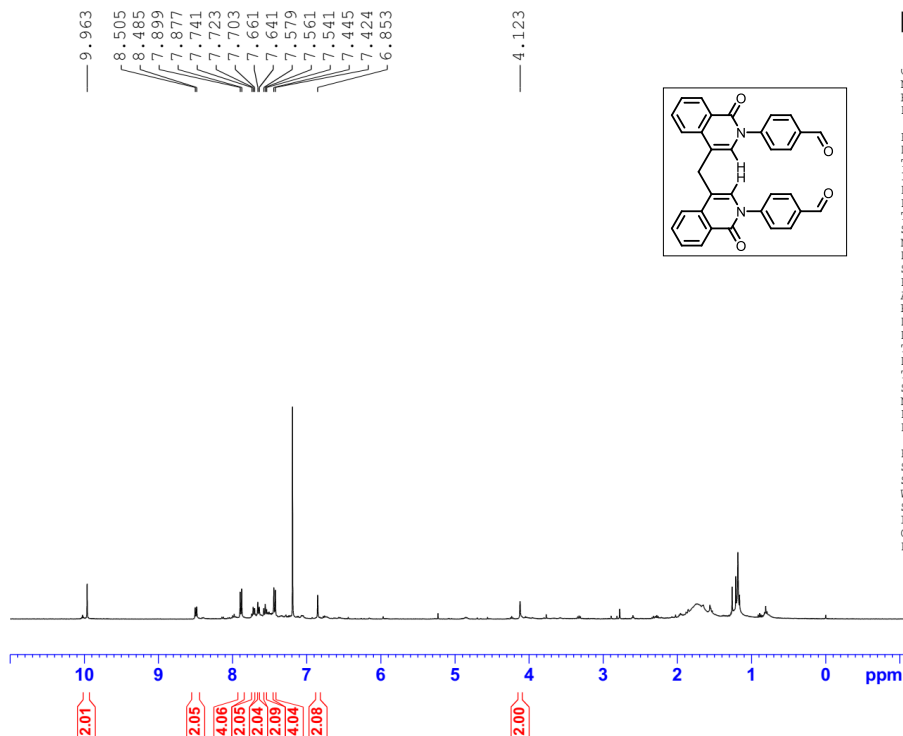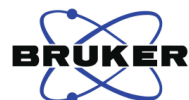

Current Data Parameters  
NAME Dr.GTV120923  
EXPNO 46  
PROCNO 1

F2 - Acquisition Parameters  
Date\_ 20230912  
Time 15.08 h  
INSTRUM spect  
PROBHD Z108618\_0505 (   
PULPROG zg30  
TD 65536  
SOLVENT CDCl3  
NS 32  
DS 2  
SWH 8012.820 Hz  
FIDRES 0.244532 Hz  
AQ 4.0894465 sec  
RG 199.6  
DW 62.400 usec  
DE 6.50 usec  
TE 305.8 K  
D1 1.00000000 sec  
TDO 1  
SFO1 400.2604716 MHz  
NUC1 1H  
P1 15.00 usec  
PLW1 14.95499992 W

F2 - Processing parameters  
SI 65536  
SF 400.2580367 MHz  
WDW EM  
SSB 0  
LB 0.30 Hz  
GB 0  
PC 1.00

## <sup>1</sup>H NMR of 3j

Signature SIF VIT VELLORE  
N-BEN-ALD

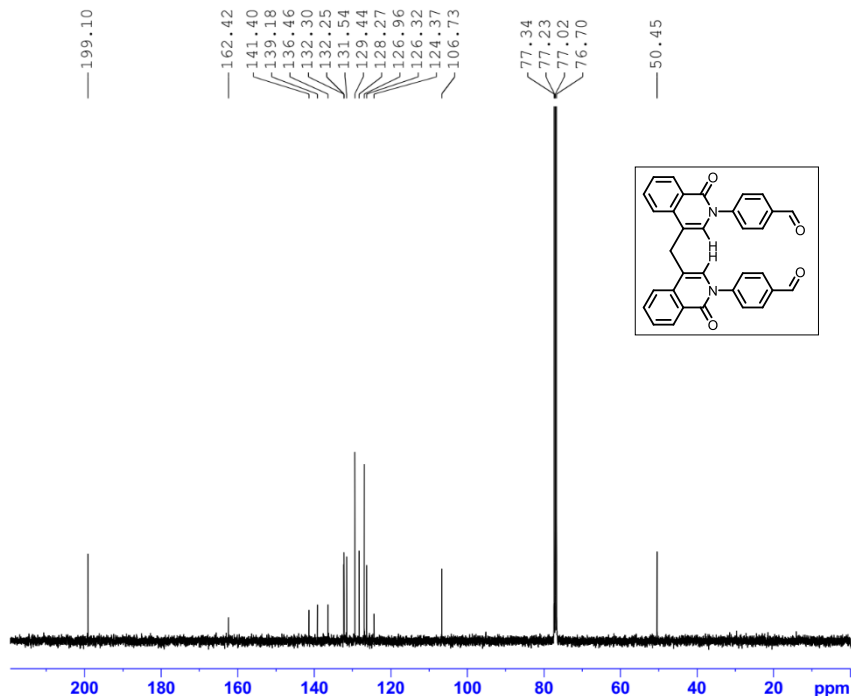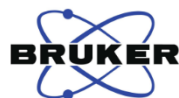

Current Data Parameters  
NAME Dr.GTV151222  
EXPNO 38  
PROCNO 1

F2 - Acquisition Parameters  
Date\_ 20221215  
Time 0.57 h  
INSTRUM spect  
PROBHD Z108618\_0505 (   
PULPROG zgpg30  
TD 65536  
SOLVENT CDCl3  
NS 512  
DS 4  
SWH 24038.461 Hz  
FIDRES 0.733596 Hz  
AQ 1.3631488 sec  
RG 199.6  
DW 20.800 usec  
DE 6.50 usec  
TE 304.9 K  
D1 2.00000000 sec  
D11 0.03000000 sec  
TDO 1  
SFO1 100.6550186 MHz  
NUC1 13C  
P1 10.00 usec  
PLW1 58.22499847 W  
SFO2 400.2596010 MHz  
NUC2 1H  
CPDPRG[2] waltz16  
PCPD2 90.00 usec  
PLW2 14.95499992 W  
PLW12 0.41542000 W  
PLW13 0.20895000 W

F2 - Processing parameters  
SI 32768  
SF 100.6449542 MHz  
WDW EM  
SSB 0  
LB 1.00 Hz  
GB 0  
PC 1.40

## <sup>1</sup>H NMR of 3k

Signature SIF VIT VELLORE  
N-1-NAPH-DIMER

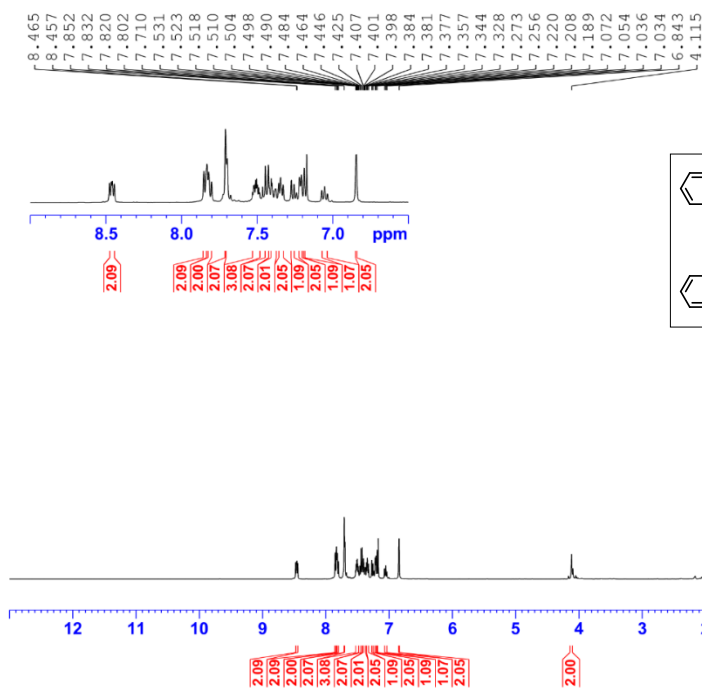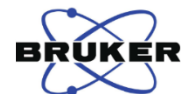

Current Data Parameters  
NAME Dr.RGL131023  
EXPNO 25  
PROCNO 1

F2 - Acquisition Parameters  
Date 20231013  
Time 20.22 h  
INSTRUM spect  
PROBHD z108618\_0505 (1  
PULPROG zg30  
TD 65536  
SOLVENT CDCl3  
NS 32  
DS 2  
SWH 8012.820 Hz  
FIDRES 0.244532 Hz  
AQ 4.0894465 sec  
RG 112.69  
DW 62.400 usec  
DE 6.50 usec  
TE 305.5 K  
D1 1.00000000 sec  
TD0 1  
SFO1 400.2604716 MHz  
NUC1 1H  
P1 15.00 usec  
PLW1 14.95499992 W

F2 - Processing parameters  
SI 65536  
SF 400.2580448 MHz  
WDW EM  
SSB 0  
LB 0.30 Hz  
GB 0  
PC 1.00

## <sup>13</sup>C NMR of 3k

Signature SIF VIT VELLORE  
N-1-NAPH-DIMER

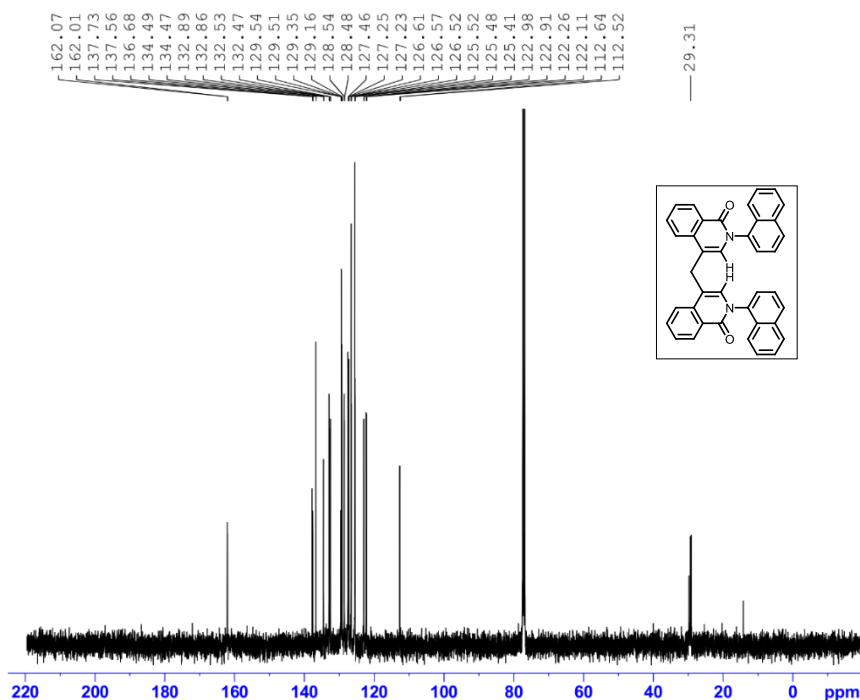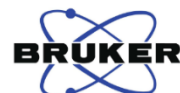

Current Data Parameters  
NAME Dr.RGL131023  
EXPNO 26  
PROCNO 1

F2 - Acquisition Parameters  
Date 20231013  
Time 20.53 h  
INSTRUM spect  
PROBHD z108618\_0505 (1  
PULPROG zgpg30  
TD 65536  
SOLVENT CDCl3  
NS 512  
DS 4  
SWH 24038.461 Hz  
FIDRES 0.733596 Hz  
AQ 1.3631488 sec  
RG 199.6  
DW 20.800 usec  
DE 6.50 usec  
TE 306.1 K  
D1 2.00000000 sec  
D11 0.03000000 sec  
TD0 1  
SFO1 100.6550186 MHz  
NUC1 13C  
P1 10.00 usec  
PLW1 58.22459947 W  
SFO2 400.2596010 MHz  
NUC2 1H  
CPDPRG2 waltz16  
PCPD2 30.00 usec  
PLW2 14.95499992 W  
PLW12 0.41542000 W  
PLW13 0.20895000 W

F2 - Processing parameters  
SI 32768  
SF 100.6449542 MHz  
WDW EM  
SSB 0  
LB 1.00 Hz  
GB 0  
PC 1.40

## <sup>1</sup>H NMR of 3l

Signature SIF VIT VELLORE  
N2NAPH

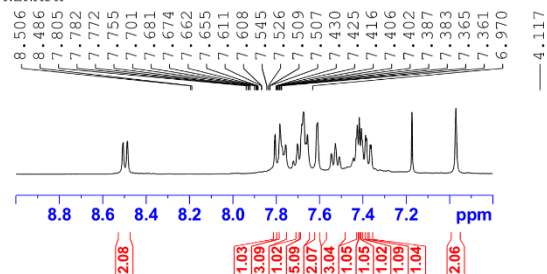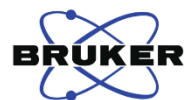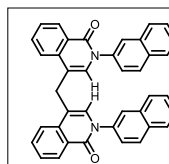

Current Data Parameters  
NAME Dr.GTV290724  
EXPNO 62  
PROCNO 1  
F2 - Acquisition Parameters  
Date\_ 20240729  
Time 15.18 h  
INSTRUM spect  
PROBHD Z108618\_0505 (zg30)  
PULPROG zg30  
TD 65536  
SOLVENT CDCl3  
NS 32  
DS 2  
SWH 8012.820 Hz  
FIDRES 0.244532 Hz  
AQ 4.0894465 sec  
RG 98.85  
DW 62.400 usec  
DE 6.50 usec  
TE 303.6 K  
D1 1.00000000 sec  
TD0 1  
SFO1 400.2604716 MHz  
NUC1 1H  
P1 15.00 usec  
PLW1 15.2139975 W  
F2 - Processing parameters  
SI 65536  
SF 400.2580447 MHz  
WDW EM  
SSB 0  
LB 0.30 Hz  
GB 0  
PC 1.00

## <sup>13</sup>C NMR of 3l

Signature SIF VIT VELLORE  
N2-N

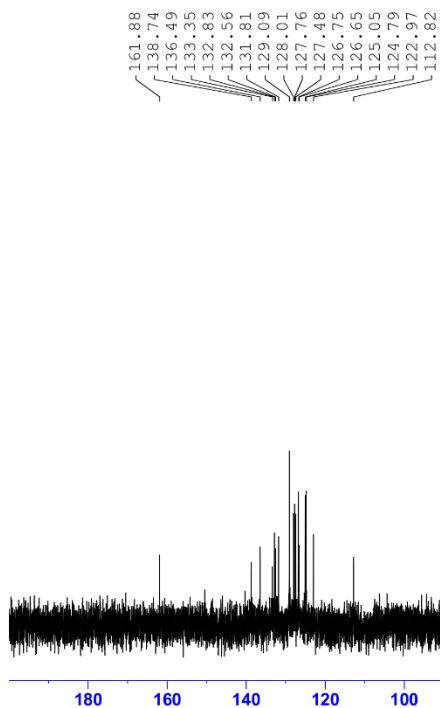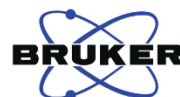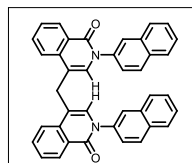

Current Data Parameters  
NAME Dr.REY100824  
EXPNO 16  
PROCNO 1  
F2 - Acquisition Parameters  
Date\_ 20240811  
Time 18.50 h  
INSTRUM spect  
PROBHD Z108618\_0505 (zgpg30)  
PULPROG zgpg30  
TD 65536  
SOLVENT CDCl3  
NS 2000  
DS 4  
SWH 24038.461 Hz  
FIDRES 0.733596 Hz  
AQ 1.3631488 sec  
RG 199.6  
DW 20.800 usec  
DE 6.50 usec  
TE 303.5 K  
D1 2.00000000 sec  
D11 0.03000000 sec  
TD0 1  
SFO1 100.6550186 MHz  
NUC1 13C  
P1 10.00 usec  
PLW1 56.49300003 W  
SFO2 400.2596010 MHz  
NUC2 1H  
CPDPRG2 waltz16  
PCPD2 90.00 usec  
PLW2 15.2139975 W  
PLW12 0.42261001 W  
PLW13 0.21257000 W  
F2 - Processing parameters  
SI 32768  
SF 100.6449542 MHz  
WDW EM  
SSB 0  
LB 1.00 Hz  
GB 0  
PC 1.40

## <sup>1</sup>H NMR of 3m

Signature SIF VIT VELLORE  
N-B-DIMER

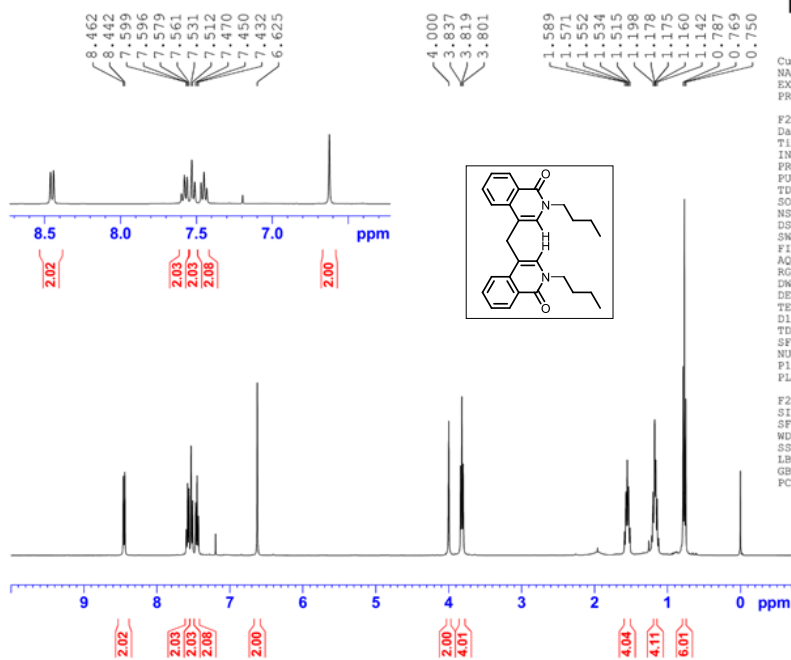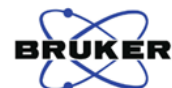

Current Data Parameters  
NAME Dr.GTV240823  
EXPNO 65  
PROCNO 1

F2 - Acquisition Parameters  
Date\_ 20230824  
Time\_ 14.35 h  
INSTRUM spect  
PROBHD Z108618\_0505 (1  
PULPROG zg30  
TD 65536  
SOLVENT CDC13  
NS 32  
DS 2  
SWH 8012.820 Hz  
FIDRES 0.244532 Hz  
AQ 4.0894465 sec  
RG 58.47  
DW 62.400 usec  
DE 6.50 usec  
TE 305.2 K  
D1 1.00000000 sec  
TD0 1  
SFO1 400.2604716 MHz  
NUC1 1H  
P1 15.00 usec  
PLW1 14.95499992 W

F2 - Processing parameters  
SI 65536  
SF 400.2580353 MHz  
WDW EM  
SSB 0  
LB 0.30 Hz  
GB 0  
PC 1.00

## <sup>13</sup>C NMR of 3m

Signature SIF VIT VELLORE  
N-BETYL DEMLA

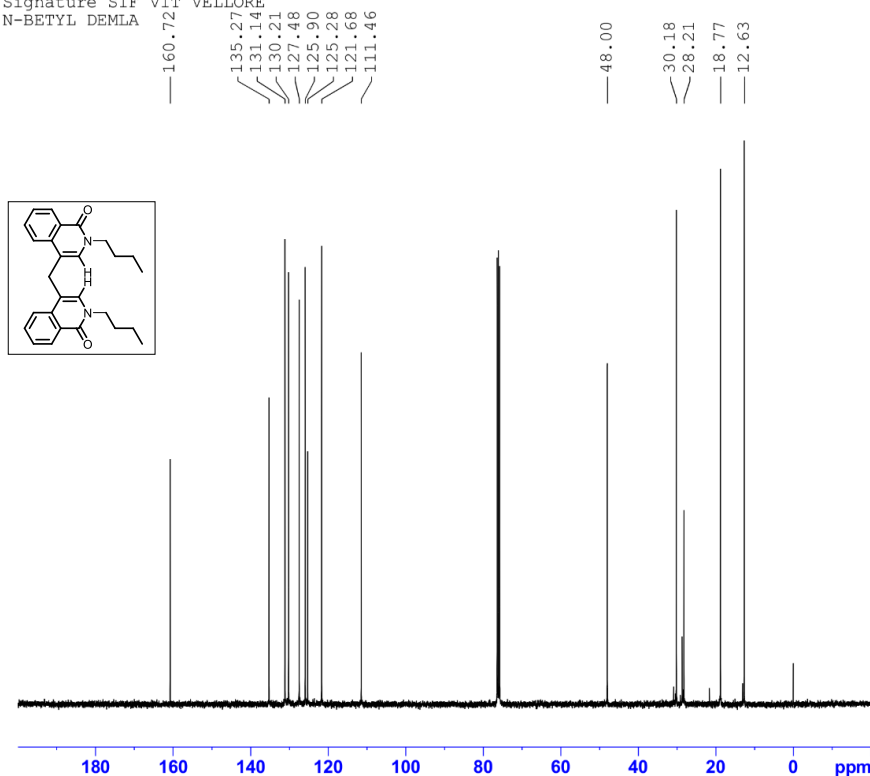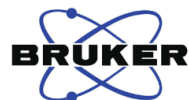

Current Data Parameters  
NAME Dr.NAP250823  
EXPNO 15  
PROCNO 1

F2 - Acquisition Parameters  
Date\_ 20230825  
Time\_ 20.44 h  
INSTRUM spect  
PROBHD Z108618\_0505 (1  
PULPROG zgpg30  
TD 65536  
SOLVENT CDC13  
NS 512  
DS 4  
SWH 24038.461 Hz  
FIDRES 0.733596 Hz  
AQ 1.3631488 sec  
RG 199.6  
DW 20.800 usec  
DE 6.50 usec  
TE 305.8 K  
D1 2.00000000 sec  
D11 0.03000000 sec  
TD0 1  
SFO1 100.6550186 MHz  
NUC1 13C  
P1 10.00 usec  
PLW1 58.22499847 W  
SFO2 400.2596010 MHz  
NUC2 1H  
CPDPRG2 waltz16  
PCPD2 90.00 usec  
PLW2 14.95499992 W  
PLW12 0.41542000 W  
PLW13 0.20895000 W

F2 - Processing parameters  
SI 32768  
SF 100.6450580 MHz  
WDW EM  
SSB 0  
LB 1.00 Hz  
GB 0  
PC 1.40

# <sup>1</sup>H NMR of 3n

Signature SIF VIT VELLORE  
i-2-Me-PROP DIMER

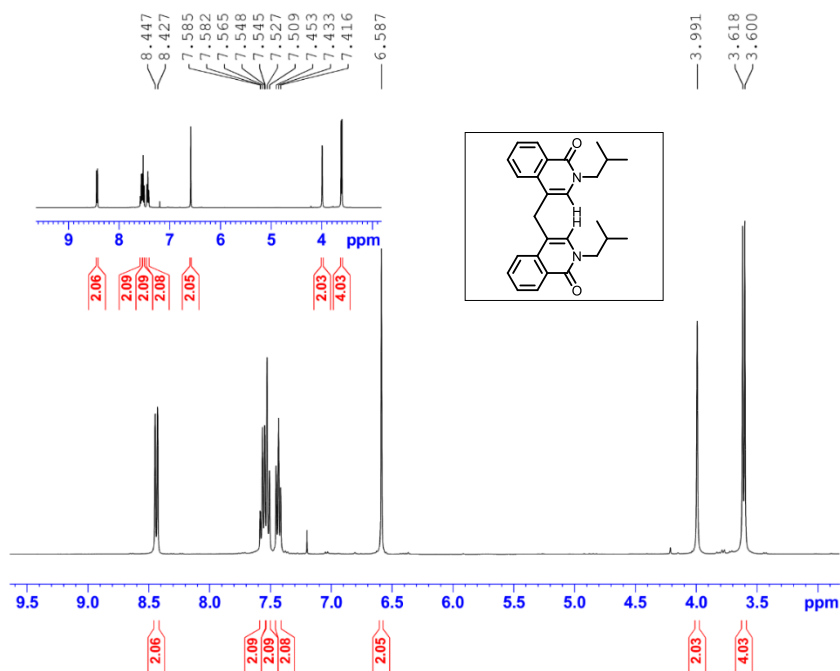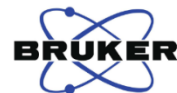

Current Data Parameters  
NAME Dr.GTV040923  
EXPNO 15  
PROCNO 1

F2 - Acquisition Parameters  
Date\_ 20230904  
Time 19.32 h  
INSTRUM spect  
PROBHD Z108618\_0505 (   
PULPROG zg30  
TD 65536  
SOLVENT CDCl3  
NS 32  
DS 2  
SWH 8012.820 Hz  
FIDRES 0.244532 Hz  
AQ 4.0894465 sec  
RG 35.49  
DW 62.400 usec  
DE 6.50 usec  
TE 305.4 K  
D1 1.00000000 sec  
TD0 1  
SFO1 400.2604716 MHz  
NUC1 1H  
P1 15.00 usec  
PLN1 14.95499992 W

F2 - Processing parameters  
SI 65536  
SF 400.2580337 MHz  
WDW EM  
SSB 0  
LB 0.30 Hz  
GB 0  
PC 1.00

# <sup>13</sup>C NMR of 3n

Signature SIF VIT VELLORE  
N-2-Me-PROP DIMER

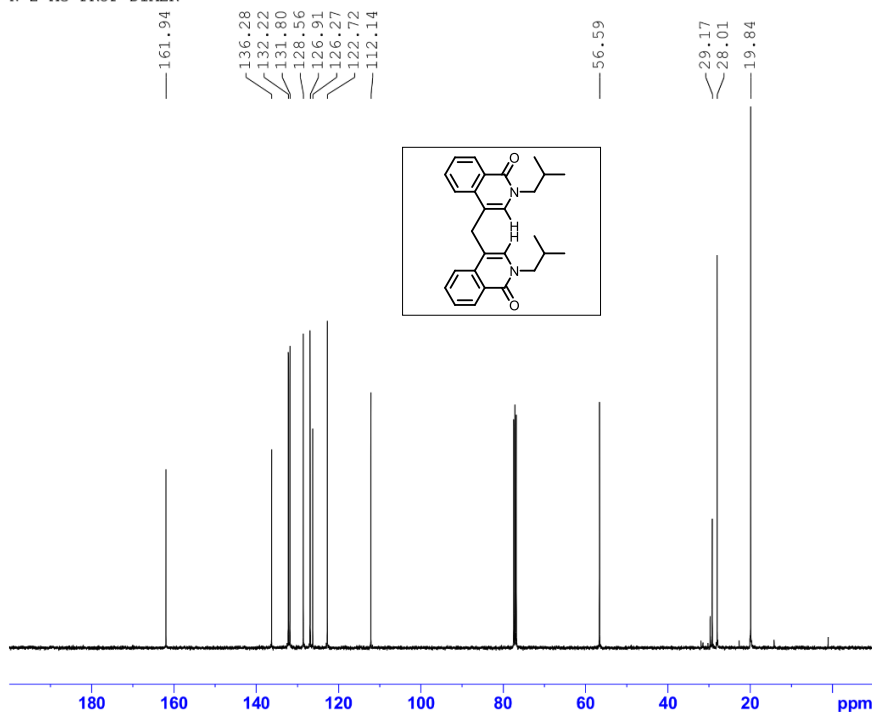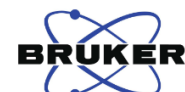

Current Data Parameters  
NAME Dr.GTV040923  
EXPNO 16  
PROCNO 1

F2 - Acquisition Parameters  
Date\_ 20230904  
Time 20.04 h  
INSTRUM spect  
PROBHD Z108618\_0505 (   
PULPROG zgpg30  
TD 65536  
SOLVENT CDCl3  
NS 512  
DS 4  
SWH 24038.461 Hz  
FIDRES 0.733596 Hz  
AQ 1.3631488 sec  
RG 199.6  
DW 20.800 usec  
DE 6.50 usec  
TE 305.8 K  
D1 2.00000000 sec  
D11 0.03000000 sec  
TD0 1  
SFO1 100.6550186 MHz  
NUC1 13C  
P1 10.00 usec  
PLN1 58.22499847 W  
SFO2 400.2596010 MHz  
NUC2 1H  
CPDPRG[2] waltz16  
PCPD2 90.00 usec  
PLN2 14.95499992 W  
PLN12 0.41542000 W  
PLN13 0.20895000 W

F2 - Processing parameters  
SI 32768  
SF 100.6449542 MHz  
WDW EM  
SSB 0  
LB 1.00 Hz  
GB 0  
PC 1.40

## <sup>1</sup>H NMR of 3o

Signature SIF VIT VELLORE  
N-CP-DIMER

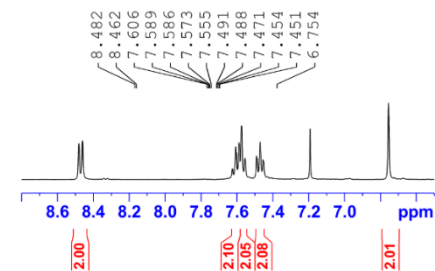

4.043  
3.724  
3.706

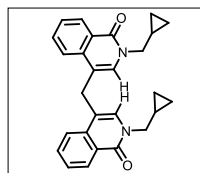

1.185  
0.387  
0.372  
0.354  
0.340  
0.156  
0.143

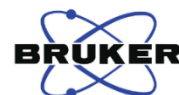

Current Data Parameters  
NAME Dr.GTV090124  
EXPNO 22  
PROCNO 1

F2 - Acquisition Parameters  
Date\_ 20240108  
Time\_ 18.01 h  
INSTRUM spect  
PROBHD Z108618\_0505 (   
PULPROG zg30  
TD 65536  
SOLVENT CDCl3  
NS 32  
DS 2  
SWH 8012.820 Hz  
FIDRES 0.244532 Hz  
AQ 4.0894465 sec  
RG 156.91  
DW 62.400 usec  
DE 6.50 usec  
TE 305.9 K  
D1 1.00000000 sec  
TDO 1  
SFO1 400.2604716 MHz  
NUC1 1H  
P1 15.00 usec  
PLW1 15.21399975 W

F2 - Processing parameters  
SI 65536  
SF 400.2580367 MHz  
WDW EM  
SSB 0  
LB 0.30 Hz  
GB 0  
PC 1.00

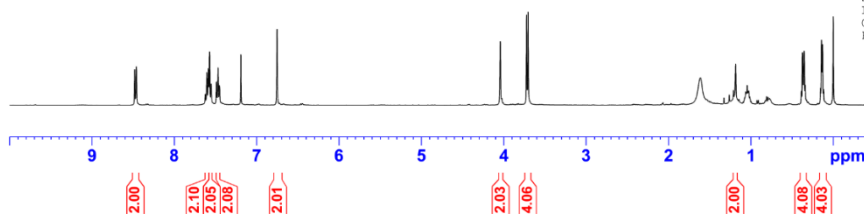

## <sup>13</sup>C NMR of 3o

Signature SIF VIT VELLORE  
N-CP-DIMER

161.90  
136.40  
132.33  
130.92  
128.60  
126.93  
126.29  
122.79  
112.51

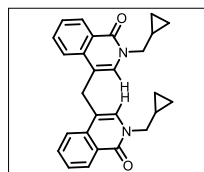

53.04

29.44

10.66

3.67

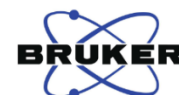

Current Data Parameters  
NAME Dr.GTV090124  
EXPNO 23  
PROCNO 1

F2 - Acquisition Parameters  
Date\_ 20240108  
Time\_ 18.33 h  
INSTRUM spect  
PROBHD Z108618\_0505 (   
PULPROG zgpg30  
TD 65536  
SOLVENT CDCl3  
NS 512  
DS 4  
SWH 24038.461 Hz  
FIDRES 0.733596 Hz  
AQ 1.3631488 sec  
RG 139.6  
DW 20.800 usec  
DE 6.50 usec  
TE 305.6 K  
D1 2.00000000 sec  
D11 0.03000000 sec  
TDO 1  
SFO1 100.6550186 MHz  
NUC1 13C  
P1 10.00 usec  
PLW1 56.49300003 W  
SFO2 400.2596010 MHz  
NUC2 1H  
CPDPRG2 waltz16  
PCPD2 90.00 usec  
PLN2 15.21399975 W  
PLN12 0.42261001 W  
PLN13 0.21257000 W

F2 - Processing parameters  
SI 32768  
SF 100.6449542 MHz  
WDW EM  
SSB 0  
LB 1.00 Hz  
GB 0  
PC 1.40

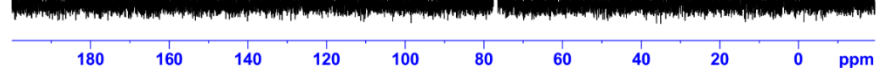

## <sup>1</sup>H NMR of 3p

Signature SIF VIT VELLORE  
UNSYMMETRICAL-S2

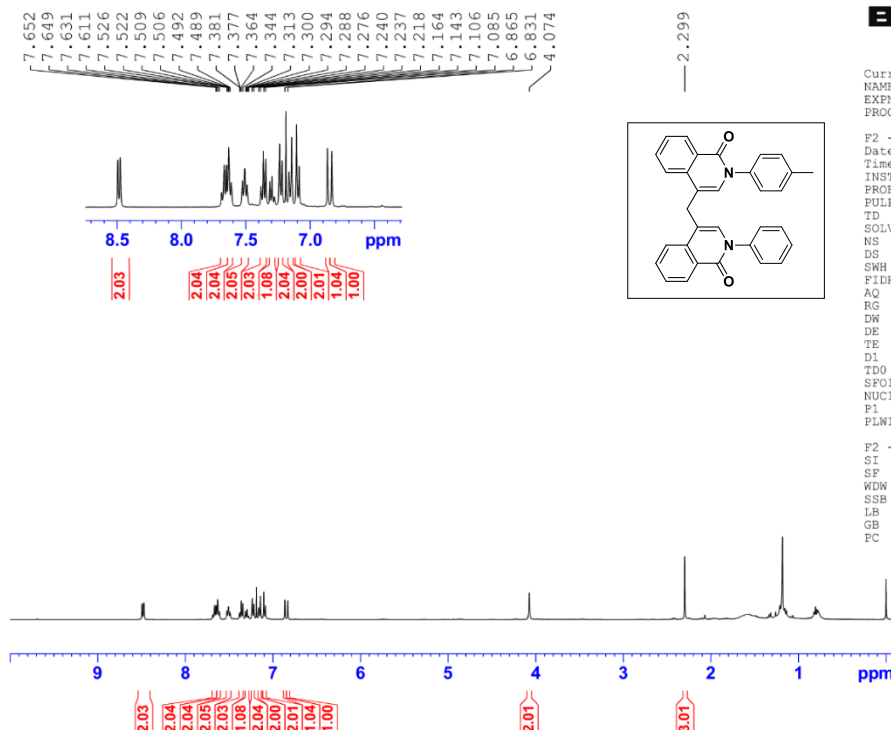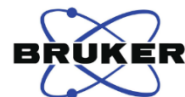

Current Data Parameters  
NAME Dr.GTV161023  
EXPNO 42  
PROCNO 1

F2 - Acquisition Parameters  
Date\_ 20231017  
Time 9.28 h  
INSTRUM spect  
PROBHD Z108618\_0505 ( )  
PULPROG zg30  
TD 65536  
SOLVENT CDCl3  
NS 32  
DS 2  
SWH 8012.820 Hz  
FIDRES 0.244532 Hz  
AQ 4.0894465 sec  
RG 143.73  
DW 62.400 usec  
DE 6.50 usec  
TE 305.9 K  
D1 1.00000000 sec  
TD0 1  
SFO1 400.2604716 MHz  
NUC1 1H  
P1 15.00 usec  
PLW1 14.95499992 W

F2 - Processing parameters  
SI 65536  
SF 400.2580389 MHz  
WDW EM  
SSB 0  
LB 0.30 Hz  
GB 0  
PC 1.00

## <sup>13</sup>C NMR of 3p

Signature SIF VIT VELLORE  
NP-PHENYL-DIMER

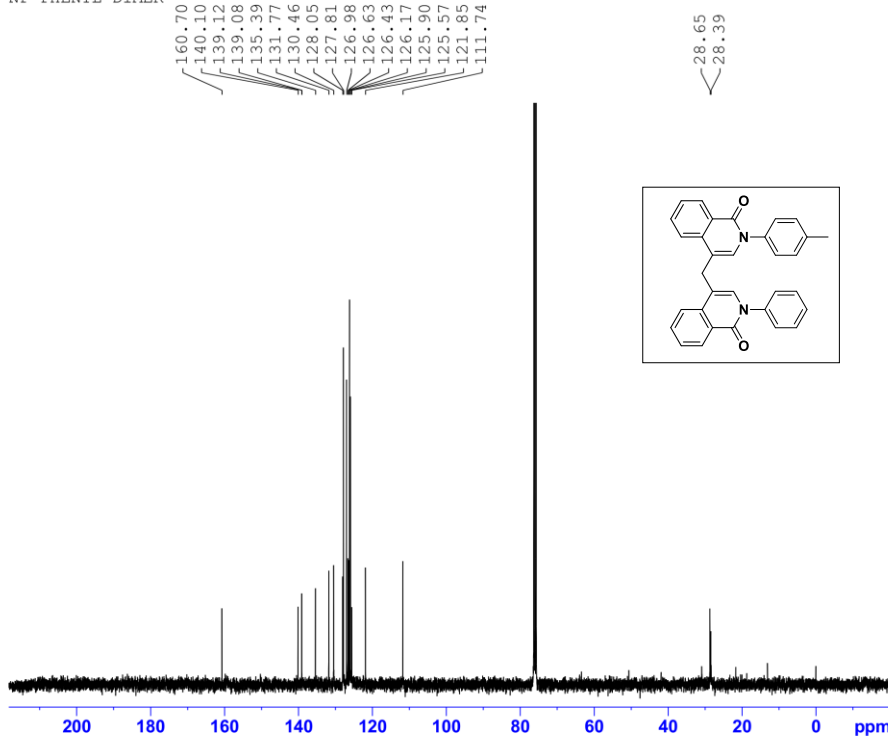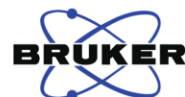

Current Data Parameters  
NAME Dr.MAP201023  
EXPNO 32  
PROCNO 1

F2 - Acquisition Parameters  
Date\_ 20231020  
Time 22.32 h  
INSTRUM spect  
PROBHD Z108618\_0505 ( )  
PULPROG zgpg30  
TD 65536  
SOLVENT CDCl3  
NS 512  
DS 4  
SWH 24038.461 Hz  
FIDRES 0.733596 Hz  
AQ 1.3631488 sec  
RG 199.6  
DW 20.800 usec  
DE 6.50 usec  
TE 306.6 K  
D1 2.00000000 sec  
D11 0.03000000 sec  
TD0 1  
SFO1 100.6550186 MHz  
NUC1 13C  
P1 10.00 usec  
PLW1 58.22499847 W  
SFO2 400.2596010 MHz  
NUC2 1H  
CPDPRG2 waltz16  
PCPD2 90.00 usec  
PLW2 14.95499992 W  
PLW12 0.41542000 W  
PLW13 0.20895000 W

F2 - Processing parameters  
SI 32768  
SF 100.6450606 MHz  
WDW EM  
SSB 0  
LB 1.00 Hz  
GB 0  
PC 1.40

## <sup>1</sup>H NMR of 3q

Signature SIF VIT VELLORE  
N-BUDO-3

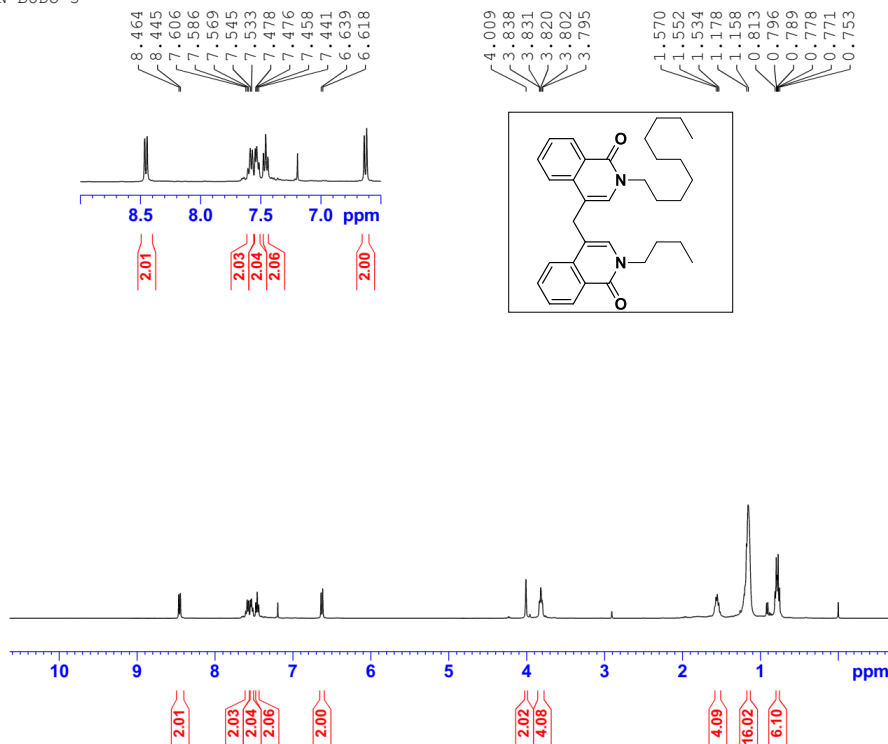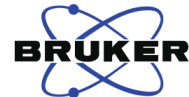

Current Data Parameters  
NAME Dr.GTV070324  
EXPNO 16  
PROCNO 1

F2 - Acquisition Parameters  
Date\_ 20240307  
Time 12.59 h  
INSTRUM spect  
PROBHD Z108618\_0505 (1  
PULPROG zg30  
TD 65536  
SOLVENT CDC13  
NS 32  
DS 2  
SWH 8012.820 Hz  
FIDRES 0.244532 Hz  
AQ 4.0894465 sec  
RG 58.47  
DW 62.400 usec  
DE 6.50 usec  
TE 302.4 K  
D1 1.00000000 sec  
TD0 1  
SFO1 400.2604716 MHz  
NUC1 1H  
P1 15.00 usec  
PLW1 15.21399975 W

F2 - Processing parameters  
SI 65536  
SF 400.2580360 MHz  
WDW EM  
SSB 0  
LB 0.30 Hz  
GB 0  
PC 1.00

## <sup>13</sup>C NMR of 3q

Signature SIF VIT VELLORE  
N-Budo-3

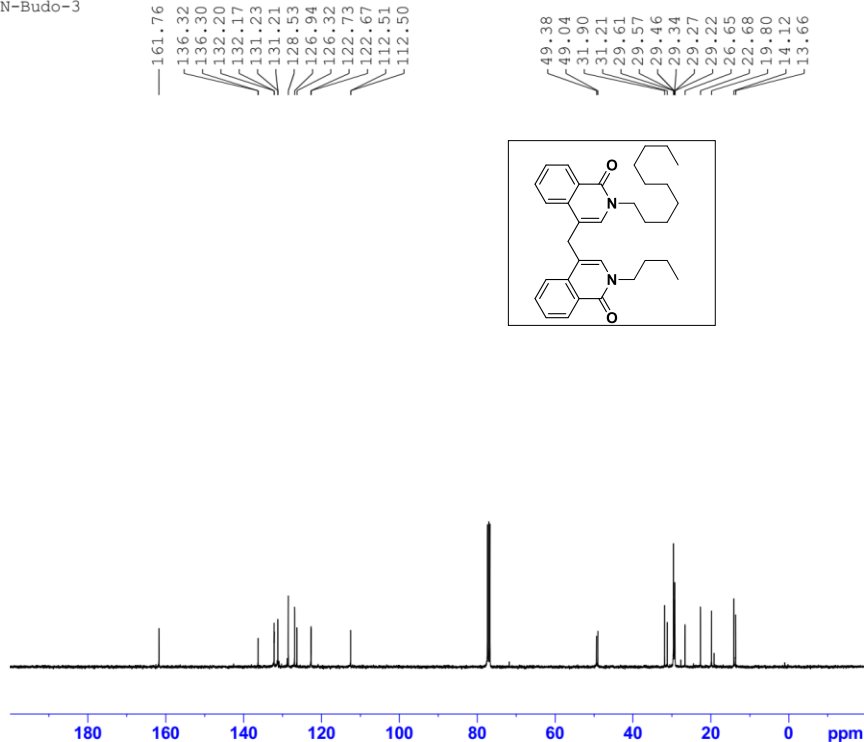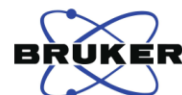

Current Data Parameters  
NAME Dr.GTV040324  
EXPNO 2  
PROCNO 1

F2 - Acquisition Parameters  
Date\_ 20240304  
Time 23.26 h  
INSTRUM spect  
PROBHD Z108618\_0505 (1  
PULPROG zgpg30  
TD 65536  
SOLVENT CDC13  
NS 512  
DS 4  
SWH 24038.461 Hz  
FIDRES 0.733596 Hz  
AQ 1.3631488 sec  
RG 199.6  
DW 20.800 usec  
DE 6.50 usec  
TE 304.1 K  
D1 2.00000000 sec  
D11 0.03000000 sec  
TD0 1  
SFO1 100.6550186 MHz  
NUC1 13C  
P1 10.00 usec  
PLW1 56.49300003 W  
SFO2 400.2596010 MHz  
NUC2 1H  
CPDPRG[2] waltz16  
PCPD2 90.00 usec  
PLW2 15.21399975 W  
PLW12 0.42261001 W  
PLW13 0.21257000 W

F2 - Processing parameters  
SI 32768  
SF 100.6449542 MHz  
WDW EM  
SSB 0  
LB 1.00 Hz  
GB 0  
PC 1.40

## <sup>1</sup>H NMR of 4a

Signature SIF VIT VELLORE  
N-PHEN-ALD

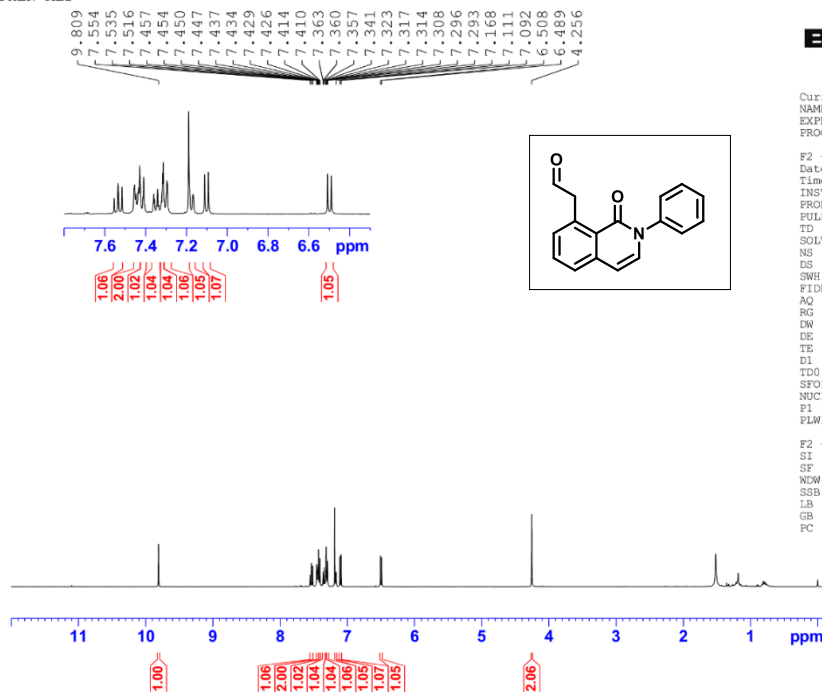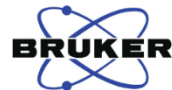

Current Data Parameters  
NAME Dr.GTV131222  
EXPNO 39  
PROCNO 1

F2 - Acquisition Parameters  
Date\_ 20221213  
Time 15.28 h  
INSTRUM spect  
PROBHD Z108618\_0505 (zq30)  
PULPROG 65536  
TD 65536  
SOLVENT CDCl<sub>3</sub>  
NS 32  
DS 2  
SWH 8012.820 Hz  
FIDRES 0.244532 Hz  
AQ 4.0894465 sec  
RG 175.97  
DW 62.400 usec  
DE 6.50 usec  
TE 303.1 K  
D1 1.00000000 sec  
TDO 1  
SFO1 400.2604716 MHz  
NUC1 1H  
P1 15.00 usec  
PLW1 14.95499992 W

F2 - Processing parameters  
SI 65536  
SF 400.2580381 MHz  
WDW EM  
SSB 0  
LB 0.30 Hz  
GB 0  
PC 1.00

## <sup>13</sup>C NMR of 4a

Signature SIF VIT VELLORE  
N-BEN-ALD

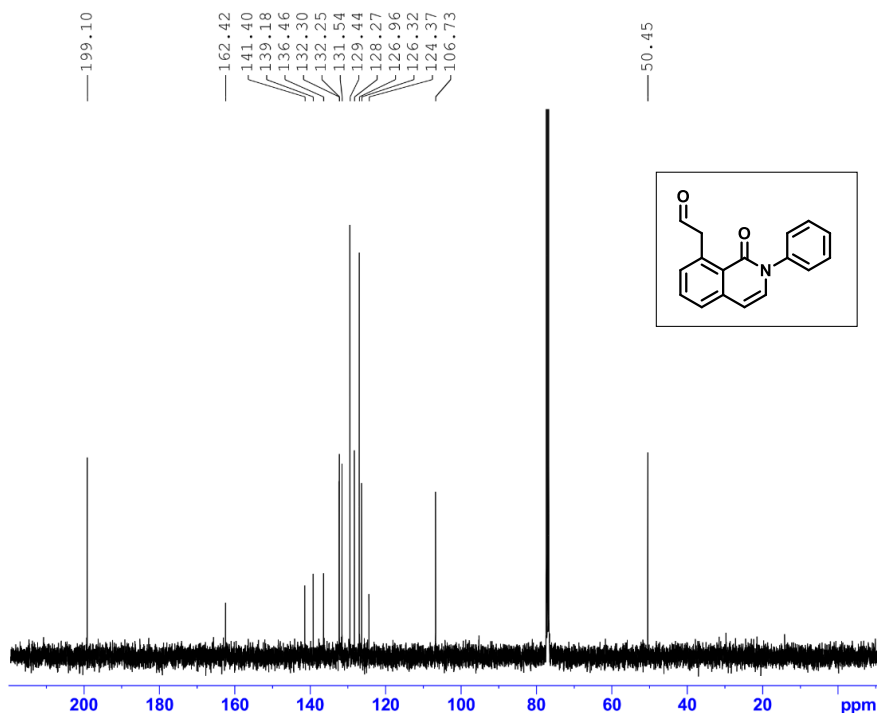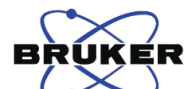

Current Data Parameters  
NAME Dr.GTV141222  
EXPNO 38  
PROCNO 1

F2 - Acquisition Parameters  
Date\_ 20221215  
Time 0.57 h  
INSTRUM spect  
PROBHD Z108618\_0505 (zpgp30)  
PULPROG 65536  
TD 65536  
SOLVENT CDCl<sub>3</sub>  
NS 512  
DS 4  
SWH 24038.461 Hz  
FIDRES 0.733596 Hz  
AQ 1.3631488 sec  
RG 199.6  
DW 20.800 usec  
DE 6.50 usec  
TE 304.9 K  
D1 2.00000000 sec  
D11 0.03000000 sec  
TDO 1  
SFO1 100.6550186 MHz  
NUC1 13C  
P1 10.00 usec  
PLW1 58.22499847 W  
SFO2 400.2596010 MHz  
NUC2 1H  
CPDPRG[2] waltz16  
F2PD2 90.00 usec  
PLW2 14.95499992 W  
PLW12 0.41542000 W  
PLW13 0.20895000 W

F2 - Processing parameters  
SI 32768  
SF 100.6449542 MHz  
WDW EM  
SSB 0  
LB 1.00 Hz  
GB 0  
PC 1.40

## <sup>1</sup>H NMR of 4b

Signature SIF VIT VELLORE  
N-NAPH-ALD

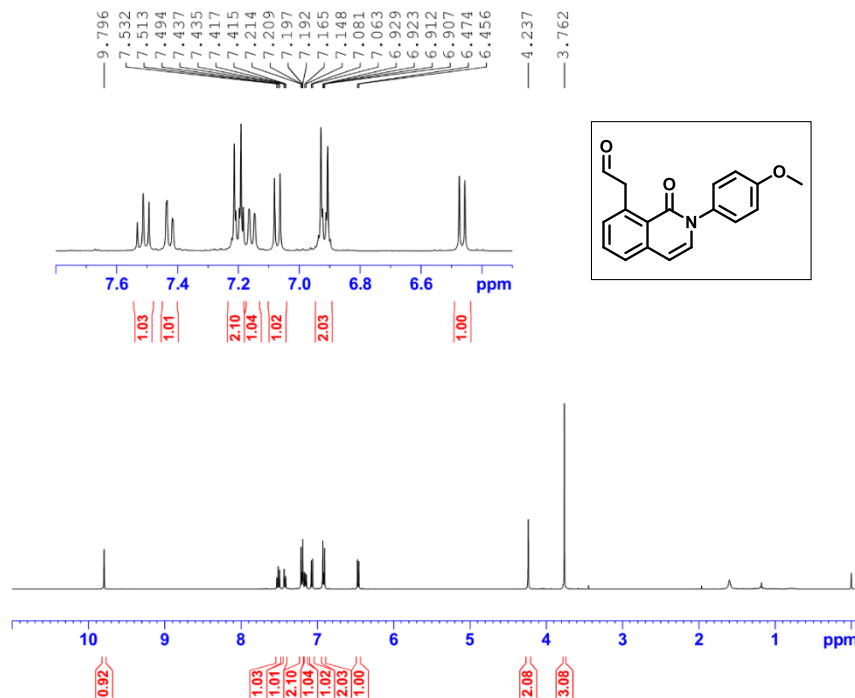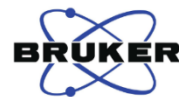

Current Data Parameters  
NAME H1  
EXPNO 67  
PROCNO 1

F2 - Acquisition Parameters  
Date\_ 20221223  
Time 9.54 h  
INSTRUM spect  
PROBHD Z108618\_0505 ( )  
PULPROG zg30  
TD 65536  
SOLVENT CDCl3  
NS 32  
DS 2  
SWH 8012.820 Hz  
FIDRES 0.244532 Hz  
AQ 4.0894465 sec  
RG 98.85  
DW 62.400 usec  
DE 6.50 usec  
TE 304.7 K  
D1 1.00000000 sec  
TDO 1  
SFO1 400.2604716 MHz  
NUC1 1H  
P1 15.00 usec  
PLW1 14.95499992 W

F2 - Processing parameters  
SI 65536  
SF 400.2580399 MHz  
WDW EM  
SSB 0  
LB 0.30 Hz  
GB 0  
PC 1.00

## <sup>13</sup>C NMR of 4b

Signature SIF VIT VELLORE  
N-NAPH-ALD

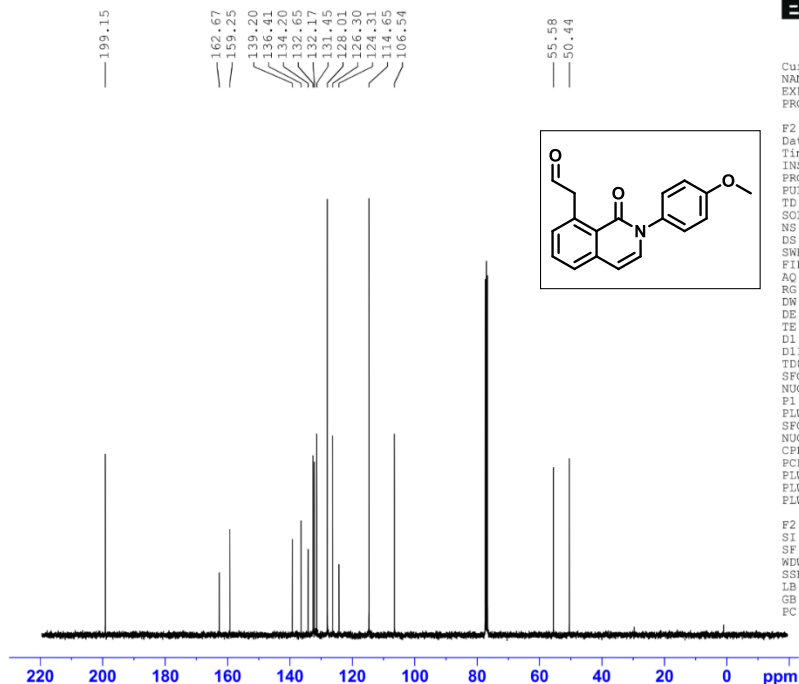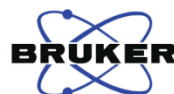

Current Data Parameters  
NAME C13  
EXPNO 74  
PROCNO 1

F2 - Acquisition Parameters  
Date\_ 20221224  
Time 0.11 h  
INSTRUM spect  
PROBHD Z108618\_0505 ( )  
PULPROG zgpg30  
TD 65536  
SOLVENT CDCl3  
NS 512  
DS 4  
SWH 24038.461 Hz  
FIDRES 0.733596 Hz  
AQ 1.3631488 sec  
RG 199.6  
DW 20.800 usec  
DE 6.50 usec  
TE 304.6 K  
D1 2.00000000 sec  
D11 0.03000000 sec  
TDO 1  
SFO1 100.6550186 MHz  
NUC1 13C  
P1 10.00 usec  
PLW1 58.22499847 W  
SFO2 400.2596010 MHz  
NUC2 1H  
CPDPRG[2] waltz16  
PCPD2 90.00 usec  
PLW2 14.95499992 W  
PLW12 0.41542000 W  
PLW13 0.20895000 W

F2 - Processing parameters  
SI 32768  
SF 100.6449542 MHz  
WDW EM  
SSB 0  
LB 1.00 Hz  
GB 0  
PC 1.40

## <sup>1</sup>H NMR of 4c

Signature SIF VIT VELLORE  
JCL1

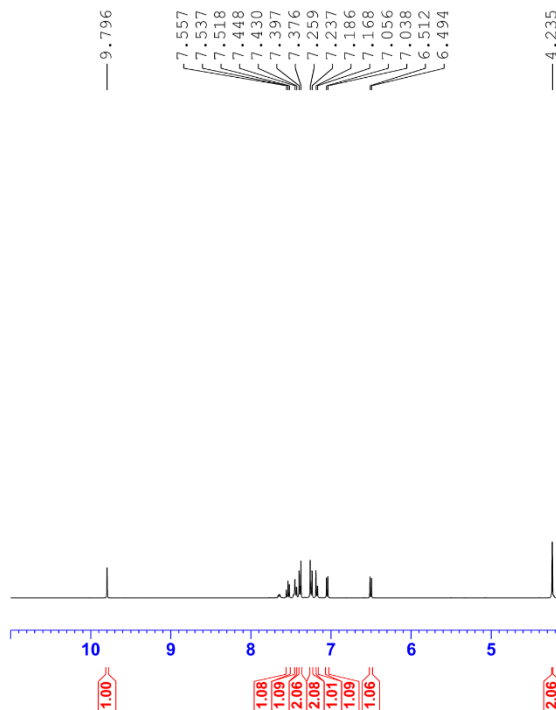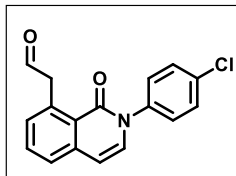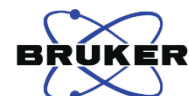

Current Data Parameters  
NAME Dr.GTV090824  
EXPNO 24  
PROCNO 1

F2 - Acquisition Parameters  
Date\_ 20240809  
Time 13.30 h  
INSTRUM spect  
PROBHD z108618\_0505 (zg30)  
TD 65536  
SOLVENT CDCl<sub>3</sub>  
NS 32  
DS 2  
SWH 8012.820 Hz  
FIDRES 0.244532 Hz  
AQ 4.0894465 sec  
RG 98.85  
DW 62.400 usec  
DE 6.50 usec  
TE 303.3 K  
D1 1.00000000 sec  
TD0 1  
SFO1 400.2604716 MHz  
NUC1 1H  
P1 15.00 usec  
PLW1 15.21399975 W

F2 - Processing parameters  
SI 65536  
SF 400.2580391 MHz  
WDW EM  
SSB 0  
LB 0.30 Hz  
GB 0  
PC 1.00

## <sup>13</sup>C NMR of 4c

Signature SIF VIT VELLORE  
4-CL-PHE-ALD

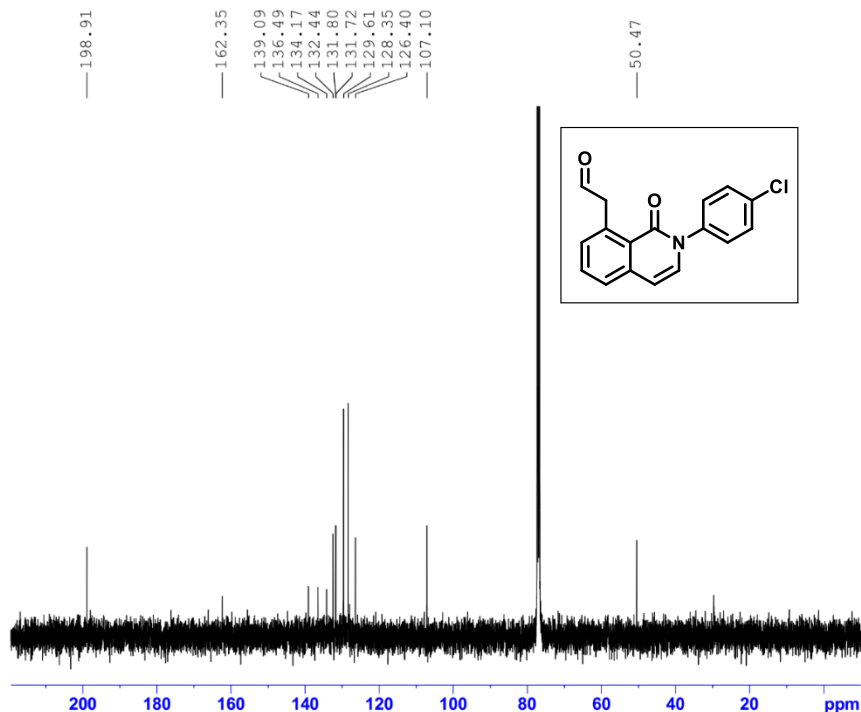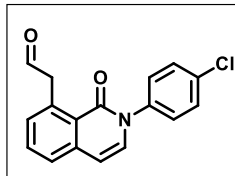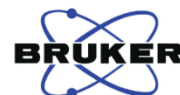

Current Data Parameters  
NAME Dr.GSK10423  
EXPNO 1  
PROCNO 1

F2 - Acquisition Parameters  
Date\_ 20230402  
Time 18.33 h  
INSTRUM spect  
PROBHD z108618\_0505 (zgpg30)  
TD 65536  
SOLVENT CDCl<sub>3</sub>  
NS 2000  
DS 4  
SWH 24038.461 Hz  
FIDRES 0.733596 Hz  
AQ 1.3631488 sec  
RG 112.69  
DW 20.800 usec  
DE 6.50 usec  
TE 304.8 K  
D1 2.00000000 sec  
D11 0.03000000 sec  
TD0 1  
SFO1 100.6550186 MHz  
NUC1 13C  
P1 10.00 usec  
PLW1 58.2249847 W  
SFO2 400.2596010 MHz  
NUC2 1H  
CPDPRG2 waltz16  
PCPD2 90.00 usec  
PLW2 14.95499992 W  
PLW12 0.41542000 W  
PLW13 0.20895000 W

F2 - Processing parameters  
SI 32768  
SF 100.6449542 MHz  
WDW EM  
SSB 0  
LB 1.00 Hz  
GB 0  
PC 1.40

## <sup>1</sup>H NMR of 4d

Signature SIF VIT VELLORE  
4MEALD

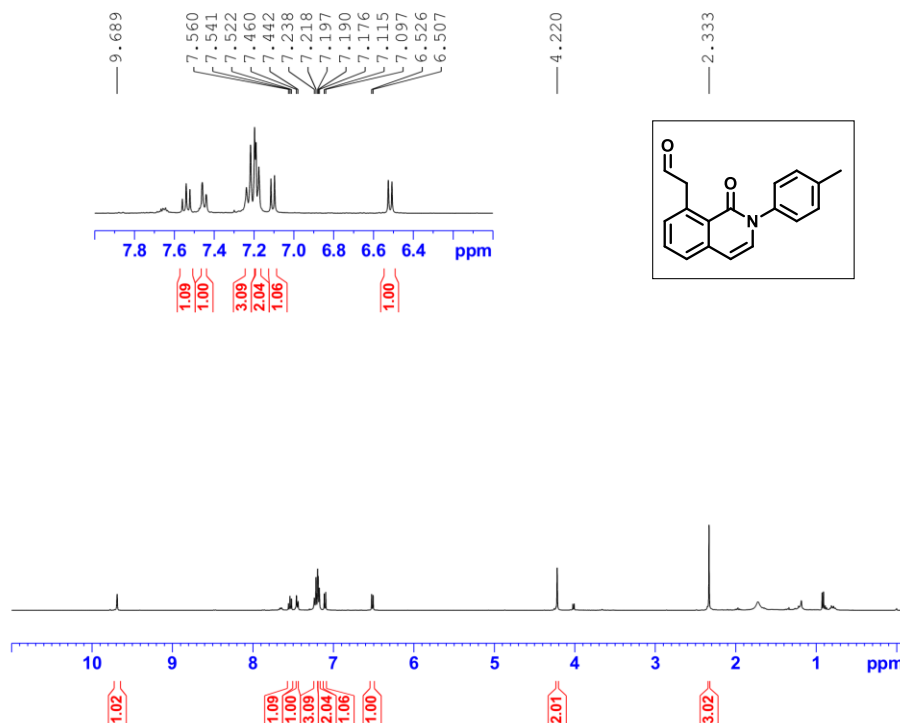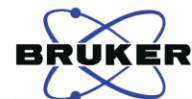

Current Data Parameters  
NAME Dr.GTV250624  
EXPNO 99  
PROCNO 1

F2 - Acquisition Parameters  
Date\_ 20240625  
Time\_ 16.02 h  
INSTRUM spect  
PROBHD Z108618\_0505 (zg30)  
PULPROG zg30  
TD 65536  
SOLVENT CDCl3  
NS 32  
DS 2  
SWH 8012.820 Hz  
FIDRES 0.244532 Hz  
AQ 4.0894465 sec  
RG 156.91  
RG 62.400 usec  
DE 6.50 usec  
TE 303.8 K  
D1 1.00000000 sec  
TD0  
SFO1 400.2604716 MHz  
NUC1 1H  
P1 15.00 usec  
PLW1 15.21399975 W

F2 - Processing parameters  
SI 65536  
SF 400.2580378 MHz  
WDW EM  
SSB 0  
LB 0.30 Hz  
GB 0  
PC 1.00

## <sup>13</sup>C NMR of 4d

Signature SIF VIT VELLORE  
4-Me

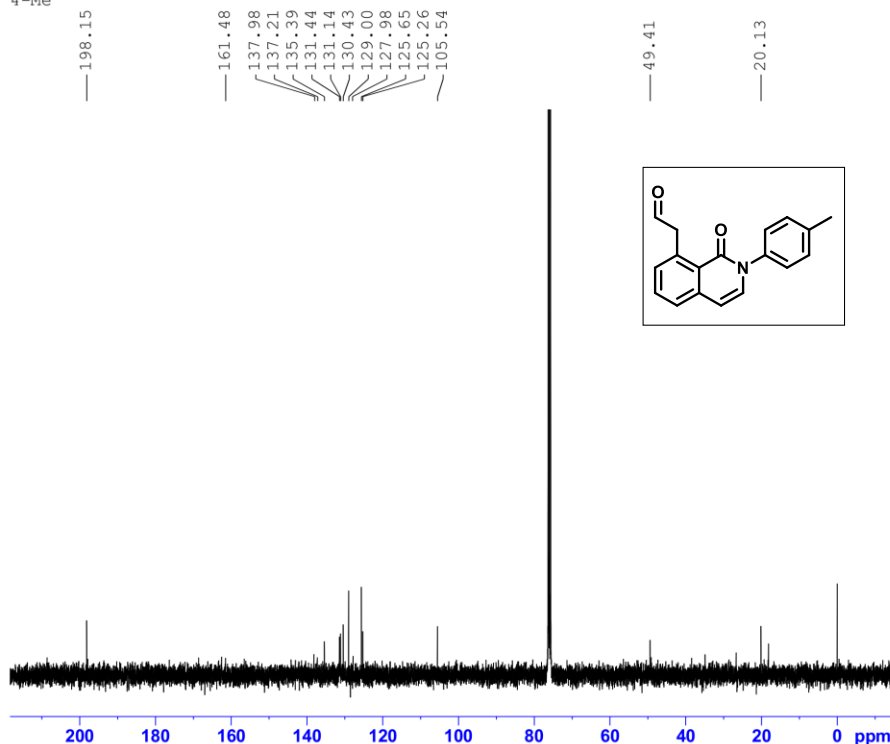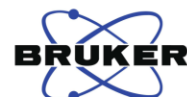

Current Data Parameters  
NAME Dr.GTV120624  
EXPNO 50  
PROCNO 1

F2 - Acquisition Parameters  
Date\_ 20240613  
Time\_ 4.25 h  
INSTRUM spect  
PROBHD Z108618\_0505 (zgpg30)  
PULPROG zgpg30  
TD 65536  
SOLVENT CDCl3  
NS 512  
DS 4  
SWH 24038.461 Hz  
FIDRES 0.733596 Hz  
AQ 1.3631488 sec  
RG 175.97  
RG 20.800 usec  
DE 6.50 usec  
TE 303.4 K  
D1 2.00000000 sec  
D11 0.03000000 sec  
TD0 1  
SFO1 100.6550186 MHz  
NUC1 13C  
P1 10.00 usec  
PLW1 56.49300003 W  
SFO2 400.2596010 MHz  
NUC2 1H  
CPDPRG2 waltz16  
PCPD2 90.00 usec  
PLW2 15.21399975 W  
PLW12 0.42261001 W  
PLW13 0.21257000 W

F2 - Processing parameters  
SI 32768  
SF 100.6450580 MHz  
WDW EM  
SSB 0  
LB 1.00 Hz  
GB 0  
PC 1.40

## <sup>1</sup>H NMR of 4e

Signature SIF VIT VELLORE  
N-PHE-ESTER-ALD

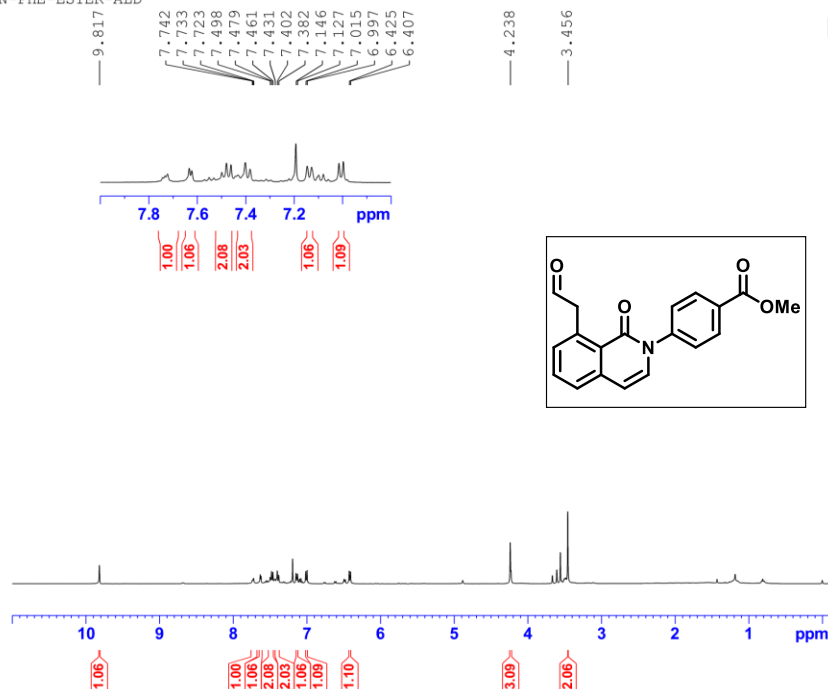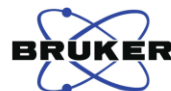

NAME Dr.GTV180123  
EXPNO 45  
PROCNO 1

F2 - Acquisition Parameters  
Date\_ 20230118  
Time 15.38 h  
INSTRUM spect  
PROBHD Z108618\_0505 ( )  
PULPROG zg30  
TD 65536  
SOLVENT CDCl3  
NS 32  
DS 2  
SWH 8012.820 Hz  
FIDRES 0.244532 Hz  
AQ 4.089465 sec  
RG 156.91  
DW 62.400 usec  
DE 6.50 usec  
TE 305.6 K  
D1 1.00000000 sec  
TD0 1  
SFO1 400.2604716 MHz  
NUC1 1H  
P1 15.00 usec  
PLW1 14.95499992 W

F2 - Processing parameters  
SI 65536  
SF 400.2580365 MHz  
WDW EM  
SSB 0  
LB 0.30 Hz  
GB 0  
PC 1.00

## <sup>13</sup>C NMR of 4e

Signature SIF VIT VELLORE  
N-PHE-EST-ALD

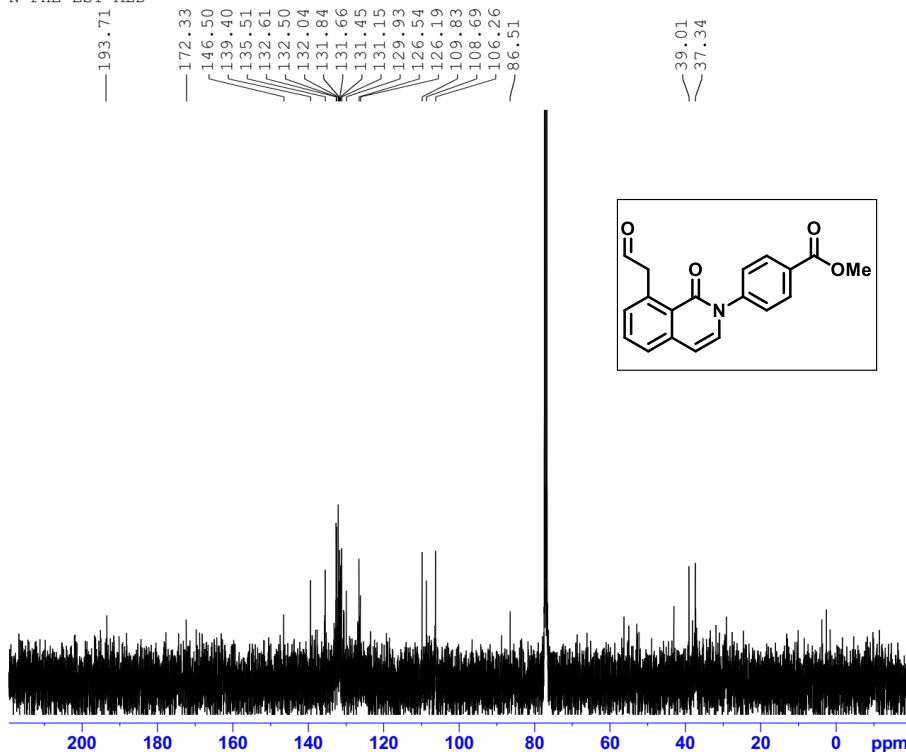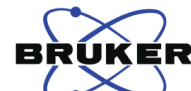

Current Data Parameters  
NAME Dr.GTV190324  
EXPNO 65  
PROCNO 1

F2 - Acquisition Parameters  
Date\_ 20240319  
Time 23.42 h  
INSTRUM spect  
PROBHD Z108618\_0505 ( )  
PULPROG zgpg30  
TD 65536  
SOLVENT CDCl3  
NS 512  
DS 4  
SWH 24038.461 Hz  
FIDRES 0.733596 Hz  
AQ 1.3631488 sec  
RG 199.6  
DW 20.800 usec  
DE 6.50 usec  
TE 306.6 K  
D1 2.00000000 sec  
D11 0.03000000 sec  
TD0 1  
SFO1 100.6550186 MHz  
NUC1 13C  
P1 10.00 usec  
PLW1 56.49300003 W  
SFO2 400.2596010 MHz  
NUC2 1H  
CPDPRG2 waltz16  
PCPD2 90.00 usec  
PLW2 15.21399975 W  
PLW12 0.42261001 W  
PLW13 0.21257000 W

F2 - Processing parameters  
SI 32768  
SF 100.6449542 MHz  
WDW EM  
SSB 0  
LB 1.00 Hz  
GB 0  
PC 1.40

# <sup>1</sup>H NMR of 4f

Signature SIF VIT VELLORE  
NAPH-ACD

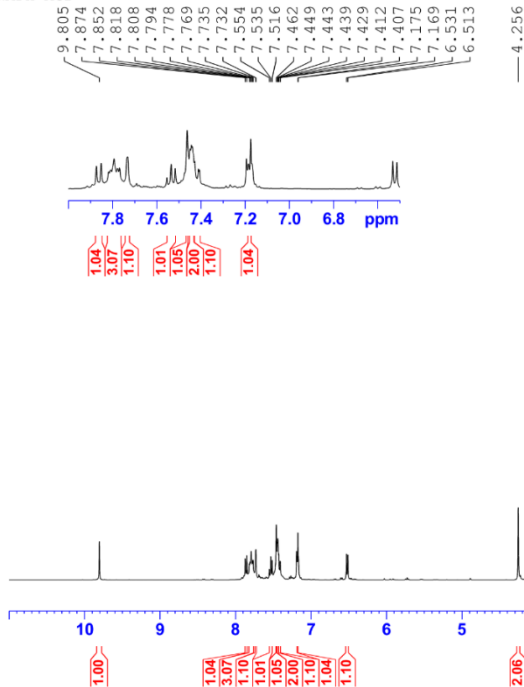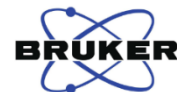

Current Data Parameters  
NAME Dr.NP231222  
EXPNO 23  
PROCNO 1

F2 - Acquisition Parameters  
Date\_ 20221223  
Time\_ 11:54 h  
INSTRUM spect  
PROBHD Z108618\_0505 ( )  
PULPROG zg30  
TD 65536  
SOLVENT CDCl3  
NS 32  
DS 2  
SWH 8012.820 Hz  
FIDRES 0.244532 Hz  
AQ 4.0894465 sec  
RG 98.85  
DW 62.400 usec  
DE 6.50 usec  
TE 304.6 K  
D1 1.00000000 sec  
TD0 1  
SFO1 400.2604716 MHz  
NUC1 1H  
P1 15.00 usec  
PLW1 14.95499992 W

F2 - Processing parameters  
SI 65536  
SF 400.2580438 MHz  
WDW EM  
SSB 0  
LB 0.30 Hz  
GB 0  
PC 1.00

# <sup>13</sup>C NMR of 4f

Signature SIF VIT VELLORE  
N-NAPH-ALD

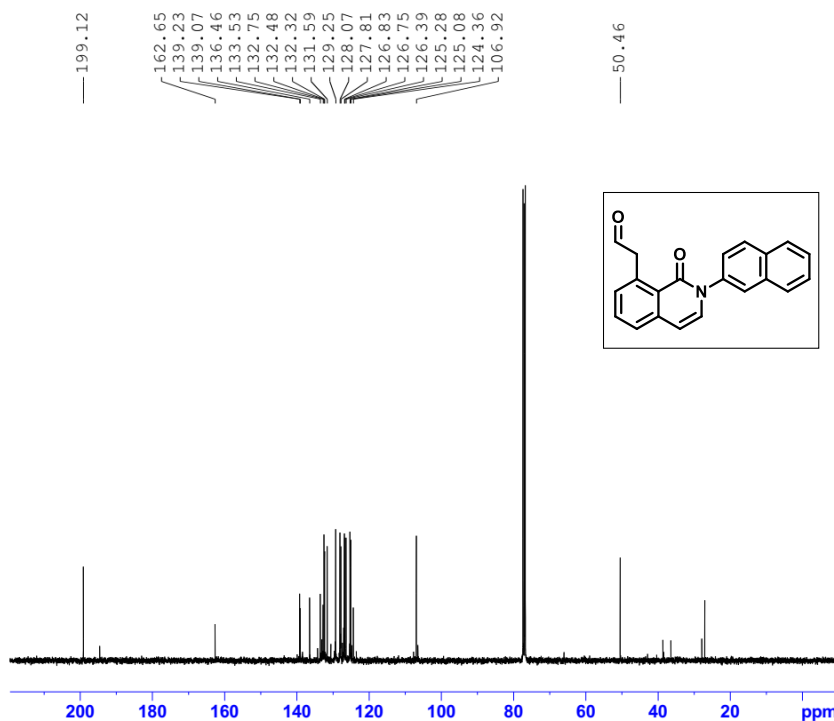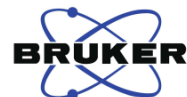

Current Data Parameters  
NAME Dr.GTV040123  
EXPNO 2  
PROCNO 1

F2 - Acquisition Parameters  
Date\_ 20230105  
Time\_ 7:45 h  
INSTRUM spect  
PROBHD Z108618\_0505 ( )  
PULPROG zgpg30  
TD 65536  
SOLVENT CDCl3  
NS 512  
DS 4  
SWH 24038.461 Hz  
FIDRES 0.733596 Hz  
AQ 1.3631488 sec  
RG 199.6  
DW 20.800 usec  
DE 6.50 usec  
TE 305.8 K  
D1 2.00000000 sec  
D11 0.03000000 sec  
TD0 1  
SFO1 100.6550186 MHz  
NUC1 13C  
P1 10.00 usec  
PLW1 58.22499847 W  
SFO2 400.2596010 MHz  
NUC2 1H  
CPDPRG[2] waltz16  
PCPD2 90.00 usec  
PLW2 14.95499992 W  
PLW12 0.41542000 W  
PLW13 0.20895000 W

F2 - Processing parameters  
SI 32768  
SF 100.6449542 MHz  
WDW EM  
SSB 0  
LB 1.00 Hz  
GB 0  
PC 1.40

## 10. References

- [1] SMART (V 5.628), SAINT (V 6.45a), XPREP, SHELXTL; Bruker AXS Inc., Madison, Wisconsin, USA, **2004**.
- [2] G. M. Sheldrick, Siemens Area Detector Absorption Correction Program. University of Göttingen, Göttingen, Germany **2004**.
- [3] A. Altomare, G. Cascarano, C. Giacovazzo, A. Guagliardi, *J. Appl. Crystallogr.* **1993**, 26, 343.
- [4] G. M. Sheldrick, SHELXL-2014, Program for Crystal Structure Solution and Refinement; University of Göttingen, Göttingen, Germany, **2014**.
- [5] L. J. Farrugia, WinGX-A Windows Program for Crystal Structure Analysis, *J. Appl. Crystallogr.* **2012**, 45, 849.
- [6] I. P. Beletskaya, A. V. Cheprakov, *Organometallics*, **2012**, 31, 7753-7808.
